# Supplementary material for: Rationale and design of the improving Care for Cardiovascular Disease in China (CCC) project: a national registry to improve management of atrial fibrillation
Source: PubMed Central journal article supplement — BMJ Open. 2018 Jul 5;8(7):e020968. doi: 10.1136/bmjopen-2017-020968 (PMC6135416; doi:10.1136/bmjopen-2017-020968), 2018-07-05
Supplement: bmjopen-2017-020968.draft_revisions.pdf [file bmjopen-2017-020968.draft_revisions.pdf]

# BMJ Open

BMJ Open is committed to open peer review. As part of this commitment we make the peer review history of every article we publish publicly available.

When an article is published we post the peer reviewers' comments and the authors' responses online. We also post the versions of the paper that were used during peer review. These are the versions that the peer review comments apply to.

The versions of the paper that follow are the versions that were submitted during the peer review process. They are not the versions of record or the final published versions. They should not be cited or distributed as the published version of this manuscript.

BMJ Open is an open access journal and the full, final, typeset and author-corrected version of record of the manuscript is available on our site with no access controls, subscription charges or pay-per-view fees (<http://bmjopen.bmj.com>).

If you have any questions on BMJ Open's open peer review process please email [info.bmjopen@bmj.com](mailto:info.bmjopen@bmj.com)

# BMJ Open

## Rationale and Design of the Improving Care for Cardiovascular Disease in China (CCC) Project: A National Registry to Improve Management of Atrial Fibrillation

|                               |                                                                                                                                                                                                                                                                                                                                                                                                                                                                                                                                                                                                                                                                                                                                                                                                                                                                                                                                                                                                                                                                                                                                                                                                                                                                                                                                                                                                                                                                                                                                                                                                                                                                                                                            |
|-------------------------------|----------------------------------------------------------------------------------------------------------------------------------------------------------------------------------------------------------------------------------------------------------------------------------------------------------------------------------------------------------------------------------------------------------------------------------------------------------------------------------------------------------------------------------------------------------------------------------------------------------------------------------------------------------------------------------------------------------------------------------------------------------------------------------------------------------------------------------------------------------------------------------------------------------------------------------------------------------------------------------------------------------------------------------------------------------------------------------------------------------------------------------------------------------------------------------------------------------------------------------------------------------------------------------------------------------------------------------------------------------------------------------------------------------------------------------------------------------------------------------------------------------------------------------------------------------------------------------------------------------------------------------------------------------------------------------------------------------------------------|
| Journal:                      | <i>BMJ Open</i>                                                                                                                                                                                                                                                                                                                                                                                                                                                                                                                                                                                                                                                                                                                                                                                                                                                                                                                                                                                                                                                                                                                                                                                                                                                                                                                                                                                                                                                                                                                                                                                                                                                                                                            |
| Manuscript ID                 | bmjopen-2017-020968                                                                                                                                                                                                                                                                                                                                                                                                                                                                                                                                                                                                                                                                                                                                                                                                                                                                                                                                                                                                                                                                                                                                                                                                                                                                                                                                                                                                                                                                                                                                                                                                                                                                                                        |
| Article Type:                 | Protocol                                                                                                                                                                                                                                                                                                                                                                                                                                                                                                                                                                                                                                                                                                                                                                                                                                                                                                                                                                                                                                                                                                                                                                                                                                                                                                                                                                                                                                                                                                                                                                                                                                                                                                                   |
| Date Submitted by the Author: | 12-Dec-2017                                                                                                                                                                                                                                                                                                                                                                                                                                                                                                                                                                                                                                                                                                                                                                                                                                                                                                                                                                                                                                                                                                                                                                                                                                                                                                                                                                                                                                                                                                                                                                                                                                                                                                                |
| Complete List of Authors:     | <p>Hao, Yongchen; Beijing An Zhen Hospital, Capital Medical University, Beijing Institute of Heart, Lung and Blood Vessel Diseases, Department of Epidemiology</p> <p>Liu, Jing; Beijing Anzhen Hospital, Capital Medical University; Beijing Institute of Heart, Lung &amp; Blood Vessel Diseases , Department of Epidemiology</p> <p>Smith, Sidney; University of North Carolina, Division of Cardiology</p> <p>Huo, Yong ; Peking University First Hospital, Department of Cardiology</p> <p>Fonarow, Gregg; University of California Los Angeles, Divisions of Cardiology</p> <p>Ge, Junbo; Shanghai Institute of Cardiovascular Diseases, Zhongshan Hospital, Fudan University, Department of Cardiology</p> <p>Liu, Jun; Beijing Anzhen Hospital, Capital Medical University, Beijing Institute of Heart, Lung and Blood Vessel Diseases, Beijing, China, Department of Epidemiology</p> <p>Taubert, Kathryn; American Heart Association, Department of Global Strategies</p> <p>Morgan, Louise; American Heart Association, International Quality Improvement Department</p> <p>Guo, Yang; Beijing Anzhen Hospital, Capital Medical University, Beijing Institute of Heart, Lung and Blood Vessel Diseases, Beijing, China, Department of Epidemiology</p> <p>Zhou, Mengge; Beijing Anzhen Hospital, Capital Medical University, Beijing Institute of Heart, Lung and Blood Vessel Diseases, Beijing, China, Department of Epidemiology</p> <p>Zhao, Dong; Beijing Anzhen Hospital, Capital Medical University; Beijing Institute of Heart, Lung &amp; Blood Vessel Diseases , Department of Epidemiology</p> <p>Ma, Chang-Sheng; Beijing AnZhen Hospital, Capital Medical University, Department of Cardiology</p> |
| Keywords:                     | Atrial fibrillation, quality improvement, healthcare, registry study                                                                                                                                                                                                                                                                                                                                                                                                                                                                                                                                                                                                                                                                                                                                                                                                                                                                                                                                                                                                                                                                                                                                                                                                                                                                                                                                                                                                                                                                                                                                                                                                                                                       |

SCHOLARONE™  
Manuscripts

**Rationale and Design of the Improving Care for Cardiovascular Disease in  
China (CCC) Project:**

**A National Registry to Improve Management of Atrial Fibrillation**

Yongchen Hao,<sup>1</sup> Jing Liu,<sup>1</sup> Sidney C. Smith Jr,<sup>2</sup> Yong Huo,<sup>3</sup> Gregg C. Fonarow,<sup>4</sup>  
Junbo Ge,<sup>5</sup> Jun Liu,<sup>1</sup> Kathryn A. Taubert,<sup>6</sup> Louise Morgan,<sup>7</sup> Yang Guo,<sup>1</sup> Mengge  
Zhou,<sup>1</sup> Dong Zhao,<sup>1</sup> \*Changsheng Ma,<sup>8</sup> on behalf of the CCC-AF Investigators

<sup>1</sup> Department of Epidemiology, Beijing An Zhen Hospital, Capital Medical University,  
Beijing Institute of Heart, Lung and Blood Vessel Diseases, Beijing, China

<sup>2</sup> Division of Cardiology, University of North Carolina, USA

<sup>3</sup> Department of Cardiology, Peking University First Hospital, China

<sup>4</sup> Divisions of Cardiology, University of California, Los Angeles, CA, USA

<sup>5</sup> Department of Cardiology, Shanghai Institute of Cardiovascular Diseases,  
Zhongshan Hospital, Fudan University, China

<sup>6</sup> Department of Global Strategies, American Heart Association, Switzerland

<sup>7</sup> International Quality Improvement Department, American Heart Association, USA

<sup>8</sup> Department of Cardiology, Beijing Anzhen Hospital, Capital Medical University,  
Beijing, China

Short title: Rationale and Design of CCC-AF

1  
2  
3  
4  
5 \* Corresponding author:  
6

7 Dr. Changsheng Ma  
8

9 Department of Cardiology,  
10

11 Beijing Anzhen Hospital, Capital Medical University,  
12

13 No. 2 Anzhen Road, Chaoyang District, Beijing 100029, China.  
14

15 Tel: +86-10-64456412  
16

17 Fax: +86-10-64456078  
18

19 E-mail: chshma@vip.sina.com.  
20  
21  
22  
23  
24  
25  
26  
27  
28  
29  
30  
31  
32  
33  
34  
35  
36  
37  
38  
39  
40  
41  
42  
43  
44  
45  
46  
47  
48  
49  
50  
51  
52  
53  
54  
55  
56  
57  
58  
59  
60

## Abstract

**Introduction:** Inadequate management of patients with atrial fibrillation (AF), the commonest sustained arrhythmia, has been reported in China for anticoagulation therapy and treatment for concomitant diseases. An effective quality improvement program has been lacking to promote the use of evidence-based therapies and improve outcome in patients with AF.

**Methods and analysis:** The Improving Care for Cardiovascular Disease in China (CCC)-AF program is a collaboration of the American Heart Association and the Chinese Society of Cardiology. This program was designed to improve adherence to AF guidelines and clinical outcomes for hospitalized patients with AF in China. Launched in February 2015, 150 hospitals were recruited by geographic-economic regions across 30 provinces in China. Each month, 10-20 inpatients with AF are enrolled in each hospital. A web-based data collection platform is used to collect clinical information for patients with AF, including patients' demographics, admission information, medical history, in-hospital care and outcomes, and discharge medications for managing AF. The quality improvement initiative included monthly benchmarked reports on hospital quality, training sessions, regular webinars, and recognition of hospital quality achievement. Primary analyses will include adherence to performance measures and guidelines. A generalized estimating equation model was used to account for within-hospital correlation when site-specific variance was a concern. As of March 2017, 28 801 AF inpatients have been enrolled.

**Ethics and dissemination:** The study protocol was approved by the Ethics Committee of Beijing Anzhen Hospital, Capital Medical University. Results will be published in peer-reviewed medical journals.

1  
2  
3 **Trial registration:** NCT02309398 (www.clinicaltrials.gov).  
4

5 **Key words:** Atrial fibrillation, quality improvement, healthcare, registry study  
6  
7  
8  
9

10  
11 **Strengths and limitations of this study**  
12

- 13  
14 • CCC-AF is a national hospital-based quality improvement program with unique  
15 tools including monthly benchmarked reports on hospital quality, training  
16 sessions, regular webinars, and recognition of hospital quality achievement.  
17  
18 • Data accuracy and completeness in this study is ensured by training sessions,  
19 standardized web-based data collection platform, onsite quality control and  
20 monitoring of data completeness.  
21  
22 • Experience from this program will help to guide development of the national  
23 health quality improvement system.  
24  
25 • Participation is voluntary and only tertiary hospitals were recruited in the  
26 CCC-AF program.  
27  
28  
29  
30  
31  
32  
33  
34  
35  
36  
37  
38  
39  
40  
41  
42  
43  
44  
45  
46  
47  
48  
49  
50  
51  
52  
53  
54  
55  
56  
57  
58  
59  
60

## INTRODUCTION

Atrial fibrillation (AF) is the commonest sustained arrhythmia and responsible for major morbidity and health care costs. It is associated with a 4–5-fold increased risk for stroke, a 40%–90% increased risk for overall mortality, and impaired quality of life.<sup>1-2</sup> The prevalence of AF is estimated to be 0.77% in China, and more than 5 million Chinese adults aged older than 35 years currently have AF.<sup>3-6</sup> There is wide availability of evidence-based guidelines with effective treatments for improving outcomes of AF.<sup>7-9</sup> However, studies have indicated that there is low compliance with evidence-based therapies in China, including assessment of thromboembolic risk, anticoagulation therapy, heart rate control, rhythm control, and adequate treatment of concomitant diseases.<sup>10,11</sup> Multiple studies using a range of methodologies have consistently documented that over 60% of patients who are candidates for anticoagulant therapy do not receive appropriate risk stratification or therapy.<sup>10-13</sup>

Although previous registries have expanded understanding of clinical practice of AF in China, they have been limited in the representativeness of hospitals and lack of quality improvement components.<sup>10,12,13</sup> To promote the use of guidelines of recommended therapies and to evaluate the effectiveness of quality improvement efforts in China, the American Heart Association (AHA) and the Chinese Society of Cardiology (CSC) launched the Improving Care for Cardiovascular Disease in China (CCC) project – AF program. The CCC-AF was modeled in part of the AHA Get With The Guidelines (GWTG) program.<sup>14</sup> It focuses on quality improvement efforts with timely feedback for care of patients with AF. This program will advance the quality of AF care by providing unique tools for quality improvement, following trends in the adoption of evidence-based therapies in routine clinical practice, and by observational treatment comparisons.

1  
2  
3 The purpose of this paper is to describe the objectives, organizational framework,  
4 recruitment of hospitals and patients, data collection and management, quality control  
5 of data collection, quality improvement tools for AF care, and progress to date of the  
6 CCC-AF program.  
7  
8  
9  
10

## 11 **METHODS AND ANALYSIS**

### 14 **Study objectives**

15  
16  
17 The overall objective of the CCC-AF program is to improve patient care for AF by  
18 development and implementation of quality improvement tools. This program aims to  
19 promote the use of evidence-based guidelines throughout the healthcare system and  
20 improve cardiovascular health, using rapid cycle of data collection, analysis, feedback,  
21 and process improvement. The specific aims of the CCC-AF program are to: (1)  
22 understand the current situation and main problems for management of patients  
23 hospitalized with AF in China; (2) evaluate the effectiveness of the continuous quality  
24 improvement efforts on the quality of care and outcomes of AF; and (3) explore and  
25 optimize quality improvement strategies for care of AF in China. The timing and  
26 dynamic monitoring of AF management will provide an opportunity to identify the  
27 potential needs of further evidence in management of AF. Experience from this  
28 program may also help to guide development of the national health quality  
29 improvement system and provide a blueprint for adaptation to other regions of the  
30 world.  
31  
32  
33  
34  
35  
36  
37  
38  
39  
40  
41  
42  
43  
44  
45  
46  
47  
48  
49  
50

### 51 **Organizational framework**

52  
53  
54 As a collaborative program of the AHA and the CSC, the CCC-AF is implemented by  
55 the Beijing Institute of Heart, Lung and Blood Vessel Diseases. AHA secures the  
56  
57  
58  
59  
60



1  
2  
3 project funding and CSC provided hospital network for CCC-AF. As a continues  
4  
5 quality improvement program launched in February 2015, CCC-AF has secured its  
6  
7 funding up to December 2018 currently. This program consists of a senior  
8  
9 management group (SMG) and a project management group. The senior management  
10  
11 group comprises 6 volunteer senior clinician leaders from AHA (Prof. Smith, Prof.  
12  
13 Fonarow and Prof. Taubert) and CSC (Prof. Huo, Prof. Ge and Prof. Ma). The SMG  
14  
15 members communicate frequently via teleconference, emails and face-to-face meeting  
16  
17 to ensure the scientific integrity and supervise the implementation of CCC-AF  
18  
19 program. The project management group is led by an international director (Ms.  
20  
21 Morgan) and a national director (Prof. Zhao), and oversees the day-to-day  
22  
23 development and implementation of the program. There are 4 subgroups under the  
24  
25 management of a project coordinator (Prof. Jing Liu), including day-to-day  
26  
27 management (Ms. Jun Liu and Ms. Zhou), data (Dr. Hao and Ms. Guo), and advisory  
28  
29 and education groups. Data collection and analysis are managed by day-to-day  
30  
31 management group and data group, with guidance from SMG.  
32  
33  
34  
35

### 36 **Hospital recruitment**

37  
38 Because hospital volumes and clinical capacities differ among geographic and  
39  
40 economic regions, we recruited hospitals that are stratified by geographic-economic  
41  
42 regions<sup>15</sup>. Mainland China includes 7 geographical regions: Northern, Northeast,  
43  
44 Eastern, Central, Southern, Southwest, and Eastern China. In each geographical region,  
45  
46 provinces are grouped into low, medium-low, medium-high, and high levels according  
47  
48 to gross domestic product per capita. A detailed hospital sampling frame is shown in  
49  
50 Supplemental Table 1. In each geographic-economic region, 10% of the tertiary  
51  
52 hospitals were recruited for our study in a voluntary manner, with a total of 150  
53  
54 hospitals. We prioritized tertiary hospitals that met specific criteria as follows: (1) the  
55  
56  
57  
58  
59  
60

1  
2  
3 average AF inpatient number per month was no less than 10; and (2) the director of the  
4 Cardiology Department was willing to participate in the program. Traditional Chinese  
5 medicine hospitals and specialized hospitals without cardiology wards were not  
6 included in CCC-AF program. The 150 hospitals were recruited in 2 phases. Hospitals  
7 that were recruited in phases 1 and 2 are listed in Supplemental Table 2 and  
8 Supplemental Table 3.

### 16 **Patient recruitment**

19 In each hospital, the first 10-20 AF inpatient cases of each month were consecutively  
20 enrolled in the study, as identified based on discharge diagnosis through review of the  
21 inpatient list. Study inclusion of AF was based on electrocardiograph results, which  
22 were documented by 12-lead electrocardiogram, 24-hour Holter monitoring, or other  
23 cardiac rhythm monitors. Patients with AF secondary to reversible condition (eg,  
24 untreated thyroid disease and pulmonary embolism) were excluded from the study.

32 Clinical data elements were collected based on American College of Cardiology  
33 (ACC)/AHA recommendations on the clinical data standard for AF.<sup>16,17</sup> As a quality  
34 improvement initiative, the CCC-AF program has high priority for collection of data  
35 elements that are involved in assessment for quality of care. Moreover, additional data  
36 elements were gathered to facilitate in-depth analysis. Data elements included  
37 patients' demographics, admission information, medical history, in-hospital care and  
38 outcomes, and discharge medications for management of AF. The case report form is  
39 shown in Supplemental Table 4 (online only data supplement). Participating hospitals  
40 were instructed to submit data for consecutive eligible patients to the CCC-AF  
41 database via a web-based data collection platform (Oracle Clinical Remote Data  
42 Capture, Oracle Corporation). Each hospital assigned a data abstractor who was  
43 responsible for data collection and entering the data elements abstracted from medical  
44  
45  
46  
47  
48  
49  
50  
51  
52  
53  
54  
55  
56  
57  
58  
59  
60

1  
2  
3 charts. Online data entry for cases that were recruited for a particular month was  
4  
5 finished before the middle of the following month.  
6  
7

### 8 **Quality control of data collection**

9  
10 Similar to the CCC-Acute Coronary Syndrome (ACS) program,<sup>18</sup> data accuracy and  
11  
12 completeness of the CCC-AF program were ensured by the following 4 strategies. (1)  
13  
14 Training sessions were held before the launch of the program with item-by-item  
15  
16 explanations for all data elements. (2) The standardized web-based data collection  
17  
18 platform has automatic data checks and queries. (3) Data accuracy was also secured  
19  
20 by onsite quality control by third-party clinical research associates. Recruited cases  
21  
22 were compared with the inpatient list to ensure that cases were reported  
23  
24 consecutively rather than selectively, and 5% of reported cases were randomly  
25  
26 selected and compared with the original medical records. (4) Data completeness was  
27  
28 calculated as number of data elements filled in the database divided by number of  
29  
30 data elements that should be filled. Each month, data completeness was monitored  
31  
32 and reports were provided as feedback to hospitals. For hospitals with data  
33  
34 completeness less than 90%, local investigators were contacted to improve quality of  
35  
36 data.  
37  
38  
39  
40

### 41 **Performance measures**

42  
43 Performance measures were developed to evaluate the quality of care for inpatients  
44  
45 with AF in the CCC-AF program. These performance measures were constructed  
46  
47 based on the statement of the ACC/AHA on AF performance measures<sup>19-21</sup>  
48  
49 integrating recommendations from the most updated ACC/AHA guideline and  
50  
51 Chinese statement for AF.<sup>7,22</sup> The quality of care presented in the monthly reports  
52  
53 was defined as primary and secondary performance measures. There are 6 primary  
54  
55  
56  
57  
58  
59  
60

1  
2  
3 performance measures, including assessment of thromboembolic risk, anticoagulant  
4 drug at discharge, prothrombin time (PT)/ international normalized ratio (INR)  
5  
6 planned follow-up, angiotensin-converting enzyme inhibitor (ACEI)/ angiotensin  
7  
8 receptor blocker (ARB) at discharge, beta-blockers at discharge, and statins at  
9  
10 discharge in AF inpatients with indications (Table 1). The full measure specifications  
11  
12 are shown in Supplemental Table 5. Eight secondary performance measures are  
13  
14 shown in Table 2 with their full measure specifications shown in Supplemental Table  
15  
16 6. Measure-specific inclusion and exclusion criteria were applied so that only eligible  
17  
18 patients without documented intolerance or other contraindications for that specific  
19  
20 measure were included in the denominator.  
21  
22  
23  
24

25 The hospital composite score for primary performance measures was calculated in  
26  
27 an opportunity-based manner. This score was defined as the sum of total instances for  
28  
29 correct care given divided by the total number of eligible opportunities based on the 6  
30  
31 primary measures.<sup>23</sup> Each patient at a CCC-AF hospital contributes care opportunities  
32  
33 to the relevant hospital's composite performance scores. In the same way, the  
34  
35 composite score for secondary performance measures was calculated based on 8  
36  
37 secondary performance measures.  
38  
39  
40

41 The CCC team will update the performance measures and keep them aligned with  
42  
43 the new or updated clinical guidelines for management of AF when necessary. After  
44  
45 the new or updated AF guidelines are released, clinical experts will evaluate whether  
46  
47 applying these changes in guidelines to CCC-AF performance measures and data  
48  
49 elements associated with them in the case report form is necessary. When changes are  
50  
51 adopted in the performance measures, hospitals have a transition period that allows  
52  
53 them to have flexibility in meeting recognition criteria for the updated performance  
54  
55 measures.  
56  
57  
58  
59  
60

## **Quality improvement tools**

Improvement in adherence to guideline recommendations was facilitated through monthly hospital quality reports, recognition of hospitals for achievement, training programs, and online educational materials.

### ***Monthly hospital quality reports***

Each month, hospitals received quality reports on performance measures for AF via online platform, accessed with a username and password. The content of hospital quality reports included individual and composite scores for primary and secondary performance measures, as well as data completeness of the reported AF cases. Hospital-specific data were summarized and compared against a variety of internal and external benchmarks. Internal benchmarks included the trend of performance measures over time. External benchmarks provided reasonable national performance thresholds to help identify areas for potential improvement of performance. Two external benchmarks were provided: overall national benchmarks and an achievable benchmark of care that describes the composite guideline-recommended treatment provided at top-performing hospitals (e.g., the top 15%). These benchmarking quality reports helped hospitals to identify areas for improvement and refine treatment processes to ensure they are in line with the guidelines. Frequencies of website visits and downloads were tracked to evaluate engagement of each participating hospital.

### ***Regional workshops***

Regional workshops corresponding with CSC regional meetings occurred once or twice per year to summarize progress, share experiences, discuss the problems that may be encountered, and introduce state-of-the-art evidence-based medicine and clinical guidelines. These face-to-face meetings served as venues where the

1  
2  
3 knowledge were shared, with discussion forums enabling delegates to identify  
4 personal and local actions needed to improve clinical practice for AF. Educational  
5 materials, such as flyers, pamphlets, or pocket guidelines, and measures with  
6 CCC-AF program branding were distributed to participating hospitals.  
7  
8  
9  
10

### 11 ***Hospital recognition***

12  
13  
14 Hospitals demonstrating best practice received recognition through an announcement  
15 ceremony at CSC annual meetings. There were 6 levels of recognition: gold, silver,  
16 and bronze medals for AF performance measures, and awards for data reports,  
17 progress, and active participation. Qualification criteria for recognition were the  
18 same as those in the CCC-ACS program.<sup>18</sup> Hospitals with best practice shared their  
19 processes behind the achievement of good clinical practice for AF.  
20  
21  
22  
23  
24  
25  
26  
27

### 28 ***Online educational materials***

29  
30  
31 The CCC websites provided a variety of online educational materials in the education  
32 source center for healthcare professionals in the participating hospitals to view and  
33 download. These web-based training materials included updated clinical guidelines  
34 and scientific statements for AF and webinars.  
35  
36  
37  
38  
39

### 40 ***Data management***

41  
42  
43 All data were treated as protected health information and securely stored in a  
44 password-protected computer system at the coordinating center. Ongoing data  
45 cleaning was performed systematically. Data managers regularly queried data for  
46 invalid and illogical values, identifying potential invalid values by searching for  
47 outliers in continuous data distributions. When a potential error was detected, data  
48 managers traced and reviewed the relevant records to resolve the issue.  
49  
50  
51  
52  
53  
54  
55  
56  
57

### Statistical considerations

Recruitment of 1500 patients (10 in each of the 150 hospitals) with AF per month will detect an improvement in the primary composite score from 45% at baseline to an expected score of 51%, with 91% power at a significance level of 0.05 at a two-sided test. The projected 6% improvement (from 45% to 51%) in primary composite score means that more 6% guideline recommended treatments will be correctly given for AF patients. Continuous variables were expressed as mean  $\pm$  SD or median (interquartile range) and categorical variables as frequency and percentage. Missing data were addressed on an analysis-specific basis. The chi-square trend test was performed to evaluate the temporal trend of performance measures. Univariate and multivariable approaches were used to identify factors associated with measures of interest, including the use of guideline-indicated therapies and in-hospital clinical outcomes. Associations between patients' characteristics and outcomes of interest were reported with odds ratios and 95% confidence intervals using logistic regression. Multivariable adjustments were used to limit the influence of confounding factors. Additionally, a generalized estimating equation model was used to account for within-hospital correlation when site-specific variance was a concern. A two-sided *P* value  $< 0.05$  was considered statistically significant. Statistical analyses were performed by SAS 9.2 (SAS Institute, Inc., Cary, NC)

### Progress to date

In total, 150 public tertiary hospitals were recruited into the program, with 75 centers in each of the 2 phases. Among them, 96 (64%) hospitals were from provincial capitals and municipalities, while the other 54 (36%) were from prefecture level cities (regional cities). The locations of participating centers are displayed in Figure 1.

1  
2  
3 A total of 28,801 AF inpatients were recruited from February 2015 to March 2017.  
4  
5 Table 3 shows the baseline demographic and clinical characteristics of the overall  
6  
7 population. The mean age of the population was 68.6 years and 15,738 (54.6%) were  
8  
9 men. Hypertension was the most prevalent concomitant disease, with a prevalence of  
10  
11 65.4%, followed by coronary artery disease (31.4%), heart failure (20.1%), and  
12  
13 diabetes mellitus (17.9%).  
14  
15

16  
17 The overall quality of care for the cohort of patients enrolled to date by the  
18  
19 composite performance measure score was 46.8%. The quality of care varied  
20  
21 between hospitals (Figure 2), with a wide range of composite scores ranging from  
22  
23 8.2% to 89.4% for primary performance measures. The composite score of the AF  
24  
25 secondary performance measures for all hospitals was 51.4%, with a wide range of  
26  
27 1.8%–96.2% (Figure 3). Adherence rates to each of the primary and secondary  
28  
29 performance measures are presented in Table 1 and Table 2. Data for quality reports  
30  
31 were exported for analysis each month, and quality reports were uploaded on the  
32  
33 CCC website ([www.ccc-heart.com](http://www.ccc-heart.com)). AF quality reports for February 2015 to March  
34  
35 2017 have been uploaded to the website.  
36  
37

## 38 **DISCUSSION**

39  
40 The growing AF population and increased recognition of mortality, morbidity,  
41  
42 diminished quality of life, and high healthcare costs associated with AF have led to  
43  
44 development of more effective treatments for AF and its complications. Currently,  
45  
46 there are several evidence-based, highly effective, guidelines of recommended  
47  
48 therapies that can significantly improve long-term care outcomes. The AHA, ACC,  
49  
50 and European Society of Cardiology (ESC) have compiled these therapies into  
51  
52 published guidelines.<sup>7,8</sup> Despite the wide availability of these guidelines, studies have  
53  
54 indicated that there is low compliance with evidence-based therapies in China, even  
55  
56  
57  
58  
59  
60



1  
2 among tertiary hospitals.<sup>10,11</sup> Reasons for low compliance to guideline-based therapies  
3 include a lack of timely feedback, poor communication, and a lack of knowledge,  
4  
5 financial resource, or time.<sup>24,25</sup>  
6  
7  
8  
9

10 Accordingly, a variety of methods for increasing adherence to guidelines have  
11 been initiated. Among them, three methods are widely used, which are increasing  
12 reporting of the data, providing incentives to improve guideline adherence, and  
13 providing hospitals and physicians with the tools and infrastructure that necessary to  
14 increase adherence.<sup>26</sup> In 2008, the National Health and Family Planning Commission  
15 of China launched a project for quality management of single diseases for acute  
16 myocardial infarction, heart failure, and coronary artery bypass grafting. This project  
17 aimed to enhance the reporting of these diseases and promote improvement in  
18 quality.<sup>27</sup> However, reporting without timely feedback and a lack of necessary  
19 infrastructure for quality improvement prevented quality management of this single  
20 diseases program from effective improvement in care.  
21  
22  
23  
24  
25  
26  
27  
28  
29  
30  
31  
32  
33

34 Previous registry studies have provided information on treatment and outcomes  
35 for patients with AF in China (Table 4)<sup>10,12,13,28-31</sup> and worldwide.<sup>31-35</sup> Zhang et al  
36 enrolled 2016 patients with AF in 20 hospitals from 2008 to 2011.<sup>10</sup> Among patients  
37 with non-valvular AF, only 12.7% of those with a CHADS<sub>2</sub> score of  $\geq 2$  were  
38 prescribed oral anticoagulants, and this percentage was much lower than that in  
39 developed countries reported by international registries.<sup>32,36-39</sup> As an ongoing registry,  
40 the Chinese Atrial Fibrillation Registry was launched in 2011 with an enrollment goal  
41 of 20,000 patients with AF in 32 hospitals in Beijing, with a follow-up of every 6  
42 months until 2020.<sup>12</sup> Although these registries have expanded understanding for  
43 clinical practice and long-term outcomes of AF, they have been limited in a finite  
44 number of hospitals and lack of quality improvement components.  
45  
46  
47  
48  
49  
50  
51  
52  
53  
54  
55  
56  
57  
58  
59  
60

1  
2  
3 In 2014, the AHA and CSC launched the CCC-AF program, aiming to improve  
4 quality of care for AF with timely feedback and quality improvement tools. The  
5 CCC-AF program is similar to the CCC-acute coronary syndrome program.<sup>18</sup> This  
6 program will provide important national data for the characteristics and care of AF  
7 inpatients. Through iterative assessment of guideline-based care, the CCC-AF  
8 program provides opportunities for improving adherence to clinical practice  
9 guidelines and other performance measures at a hospital level. Performance feedback  
10 reports may help hospitals to identify opportunities to improve patient care across a  
11 broad range of performance measures. This program provides specific resources, such  
12 as webinars and regional workshops to address the identified gaps. The CCC-AF  
13 program will also help in tracking the rate of diffusion of new knowledge and the  
14 adoption of new guideline recommendations, highlighting areas for further quality  
15 improvement.

16  
17  
18  
19  
20  
21  
22  
23  
24  
25  
26  
27  
28  
29  
30  
31 The CCC-AF program aims to improve adherence to guideline recommendations  
32 through monthly benchmarked hospital quality reports, recognition of achievement of  
33 hospital quality, training programs, and regular webinars. As shown in the improve  
34 treatment with oral anticoagulants in atrial fibrillation (IMPACT-AF) study,  
35 multifaceted educational intervention significantly increased the proportion of patients  
36 treated with oral anticoagulants and has the potential to improve stroke prevention for  
37 patients with AF.<sup>40</sup> Currently, guideline-based therapies for AF mainly focus on  
38 antithrombotic management, rate and rhythm control, and therapy of concomitant  
39 cardiac diseases. For antithrombotic management, risk stratification is an essential  
40 step for recognizing candidate patients for therapy and deciding which patients have  
41 sufficient risk to warrant oral anticoagulation. Quality improvement tools of the  
42 CCC-AF program are designed to prompt assessment of thromboembolic risk based

1  
2  
3 on easily used risk stratification scores, as well as the use of anticoagulant drugs at  
4 discharge, PT/INR planned follow-up, and therapy of concomitant cardiac diseases  
5 using ACEIs/ARBs, beta-blockers, and statins at discharge in patients with AF and  
6 indications. Because patients with AF are usually admitted with concomitant  
7 cardiovascular diseases, careful consideration of co-prescription of anticoagulants  
8 with antiplatelet therapy is warranted, balancing the bleeding risk and stroke risk. The  
9 CCC-AF program will provide important insight for patterns of current clinical practice  
10 for patients with AF and concomitant cardiovascular diseases (e.g., ACS) and  
11 procedures (e.g., percutaneous coronary intervention).  
12  
13  
14  
15  
16  
17  
18  
19  
20  
21  
22

23 The CCC-AF program is distinguished by its unique resources, which include a  
24 large hospital network and an international research team. These will facilitate the  
25 translation of study findings to improvement of quality care for AF. Tertiary hospitals  
26 provide the highest level of medical care in China, and affect secondary hospitals and  
27 primary care centers. Improvement in the quality of care for AF among these tertiary  
28 hospitals may lead to spreading their experience to secondary hospitals and primary  
29 care centers and enhance the dissemination of evidence-based interventions.  
30  
31  
32  
33  
34  
35  
36  
37

38 There are several limitations that should be mentioned. Participation is voluntary  
39 and only tertiary hospitals were recruited in the CCC-AF program. The current  
40 participating hospital profile tends to be that larger centers may have better baseline  
41 performance than smaller centers possessing fewer resources. While participating  
42 hospitals are instructed to include all consecutive AF admissions, identifying patients  
43 with AF uniformly and accurately can be challenging, so there is the potential for  
44 selection bias. Patient data are collected by medical chart review and thus dependent  
45 on the quality, accuracy, and completeness of documentation. The inpatient focus of  
46 the CCC-AF program is a further limitation. The ability to track patients over time is  
47  
48  
49  
50  
51  
52  
53  
54  
55  
56  
57

1  
2  
3 necessary to develop a more thorough understanding of downstream resource use, as  
4 well as outcomes associated with specific therapies and procedures. Collection of  
5 follow-up information and linking with administrative outcome databases will further  
6  
7 promote research on effectiveness of this project for improving quality. Also, results  
8  
9 presented here are preliminary and should be interpreted with caution.  
10  
11  
12

13  
14 As a national hospital-based quality improvement program, CCC-AF aims to  
15 provide an opportunity to improve adherence to clinical practice guidelines for  
16 managing AF. This program has unique tools for quality improvement which could  
17 improve patients' outcomes.  
18  
19  
20  
21

### 22 23 **Ethics and dissemination**

24  
25 Central institutional review board (IRB) approval was granted for the aggregate  
26 dataset for research and quality improvement by the Ethics Committee of Beijing  
27 Anzhen Hospital, Capital Medical University. Participating sites were granted a  
28 waiver of patient consent under the common rule. One hundred and eleven hospitals  
29 accepted central ethics approval and the other 39 sites applied IRB approval from  
30 their own ethics committees. The study is listed at [www.clinicaltrials.gov](http://www.clinicaltrials.gov)  
31  
32 (NCT02309398). Results will be published in peer-reviewed medical journals.  
33  
34  
35  
36  
37  
38  
39  
40

### 41 42 **Acknowledgments**

43  
44 The authors acknowledge all participating hospitals for their contribution to the  
45 program. Complete lists of participating hospitals and principal investigators are  
46 provided in Supplemental Tables 2 and 3.  
47  
48  
49  
50  
51  
52  
53  
54  
55  
56  
57  
58  
59  
60

**REFERENCES**

1. Wolf PA, Abbott RD, Kannel WB. Atrial fibrillation as an independent risk factor for stroke: the Framingham Study. *Stroke*. 1991;22:983-988.
2. Benjamin EJ, Wolf PA, D'Agostino RB, Silbershatz H, Kannel WB, Levy D. Impact of atrial fibrillation on the risk of death: the Framingham Heart Study. *Circulation*. 1998;98(10):946-952.
3. Hu D, Sun Y. Epidemiology, risk factors for stroke, and management of atrial fibrillation in China. *J Am Coll Cardiol*. 2008;52:865-868.
4. Zhou Z, Hu D, Chen J, Zhang R, Li K, Zhao X. An epidemiological survey of atrial fibrillation in China. *Chinese Journal of Internal Medicine*. 2004;43:491-494.
5. Li Y, Wu YF, Chen KP, et al. Prevalence of atrial fibrillation in China and its risk factors. *Biomed Environ Sci*. 2013;26(9):709-716.
6. Guo Y, Tian Y, Wang H, Si Q, Wang Y, Lip GY. Prevalence, incidence, and lifetime risk of atrial fibrillation in China: new insights into the global burden of atrial fibrillation. *Chest*. 2015;147(1):109-119.
7. January CT, Wann LS, Alpert JS, et al. 2014 AHA/ACC/HRS guideline for the management of patients with atrial fibrillation: executive summary: a report of the American College of Cardiology/American Heart Association Task Force on practice guidelines and the Heart Rhythm Society. *Circulation*. 2014;130:2071- 2104.
8. Camm AJ, Kirchhof P, Lip GY, et al. Guidelines for the management of atrial fibrillation: the Task Force for the Management of Atrial Fibrillation of the European Society of Cardiology (ESC). *Europace*. 2010;12(10):1360-1420.
9. Kirchhof P, Benussi S, Kotecha D, et al. 2016 ESC Guidelines for the management of atrial fibrillation developed in collaboration with EACTS: The Task Force for the management of atrial fibrillation of the European Society of Cardiology (ESC) Developed with the special contribution of the European Heart Rhythm Association (EHRA) of the ESC Endorsed by the European Stroke Organization (ESO). *Eur*

- 1  
2  
3 *Heart J.* 2016; 37: 2893–2962
- 4  
5 10. Zhang H, Yang Y, Zhu J, et al. Baseline characteristics and management of patients  
6 with atrial fibrillation/flutter in the emergency department: results of a prospective,  
7 multicentre registry in China. *Intern Med J.* 2014;44:742-748.
- 8  
9  
10  
11 11. Zhang S. Atrial fibrillation in mainland China: epidemiology and current  
12 management. *Heart.* 2009;95:1052-1055.
- 13  
14  
15 12. Chang SS, Dong JZ, Ma CS, et al. Current Status and Time Trends of Oral  
16 Anticoagulation Use Among Chinese Patients With Nonvalvular Atrial Fibrillation:  
17 The Chinese Atrial Fibrillation Registry Study. *Stroke.* 2016; 47:1803-1810
- 18  
19  
20  
21 13. Xiong Q, Shantsila A, Lane DA, et al. Sex differences in clinical characteristics and  
22 inpatient outcomes among 2442 hospitalized Chinese patients with nonvalvular atrial  
23 fibrillation: The Nanchang Atrial Fibrillation Project. *Int J Cardiol.*  
24  
25 2015;201:195-199.
- 26  
27  
28  
29 14. Ellrodt AG, Fonarow GC, Schwamm LH, et al. Synthesizing lessons learned from get  
30 with the guidelines: the value of disease-based registries in improving quality and  
31 outcomes. *Circulation.* 2013;128:2447-2460.
- 32  
33  
34  
35 15. National Bureau of Statistics of China. China Statistical Year book 2013. *China*  
36  
37 *Statistics Press. Beijing, China.* 2013.
- 38  
39  
40  
41 16. McNamara RL, Brass LM, Drozda Jr JP, et al. ACC/AHA key data elements and  
42 definitions for measuring the clinical management and outcomes of patients with  
43 atrial fibrillation: A report of the American College of Cardiology/American Heart  
44 Association Task Force on clinical data standards (writing committee to develop data  
45 standards on atrial fibrillation). *Journal of the American College of Cardiology.*  
46  
47 2004;44:475-495.
- 48  
49  
50  
51 17. Buxton AE, Calkins H, Callans DJ, et al. ACC/AHA/HRS 2006 key data elements  
52 and definitions for electrophysiological studies and procedures: a report of the  
53 American College of Cardiology/American Heart Association Task Force on Clinical  
54 Data Standards (ACC/AHA/HRS Writing Committee to Develop Data Standards on  
55  
56  
57  
58  
59  
60

- 1  
2  
3 Electrophysiology). *J Am Coll Cardiol*. 2006;48:2360-2396.
- 4  
5 18. Hao Y, Liu J, Liu J, et al. Rationale and Design of the Improving Care for  
6  
7 Cardiovascular Disease in China (CCC) Project: a National Effort to Prompt Quality  
8  
9 Enhancement for Acute Coronary Syndrome. *American Heart Journal*. 2016  
10  
11 ;179:107-15
- 12  
13 19. Spertus JA, Eagle KA, Krumholz HM, Mitchell KR, Normand SL. American College  
14  
15 of Cardiology and American Heart Association methodology for the selection and  
16  
17 creation of performance measures for quantifying the quality of cardiovascular care.  
18  
19 *Circulation*. 2005;111:1703-1712.
- 20  
21 20. Estes NA, 3rd, Halperin JL, Calkins H, et al. ACC/AHA/Physician Consortium 2008  
22  
23 clinical performance measures for adults with nonvalvular atrial fibrillation or atrial  
24  
25 flutter: a report of the American College of Cardiology/American Heart Association  
26  
27 Task Force on Performance Measures and the Physician Consortium for Performance  
28  
29 Improvement (Writing Committee to Develop Clinical Performance Measures for  
30  
31 Atrial Fibrillation): developed in collaboration with the Heart Rhythm Society.  
32  
33 *Circulation*. 2008;117(8):1101-1120.
- 34  
35 21. Bonow RO, Douglas PS, Buxton AE, et al. ACCF/AHA methodology for the  
36  
37 development of quality measures for cardiovascular technology: a report of the  
38  
39 American College of Cardiology Foundation/American Heart Association Task Force  
40  
41 on Performance Measures. *Circulation*. 2011;124:1483-1502.
- 42  
43 22. Huang C, Zhang S, Huang D, et al. Current knowledge and management  
44  
45 recommendations of atrial fibrillation: 2015. *Chinese Journal of Cardiac*  
46  
47 *Arrhythmias*. 2015(5):321-385.
- 48  
49 23. Eapen ZJ, Fonarow GC, Dai D, et al. Comparison of composite measure  
50  
51 methodologies for rewarding quality of care: an analysis from the American Heart  
52  
53 Association's Get With The Guidelines program. *Circ Cardiovasc Qual Outcomes*.  
54  
55 2011;4:610-618.
- 56  
57 24. Cabana MD, Rand CS, Powe NR, et al. Why don't physicians follow clinical practice

- 1  
2  
3 guidelines? A framework for improvement. *JAMA*. 1999;282:1458-1465.
- 4  
5 25. Berthiaume JT, Tyler PA, Ng-Osorio J, LaBresh KA. Aligning financial incentives  
6 with "Get With The Guidelines" to improve cardiovascular care. *Am J Manag Care*.  
7 2004;10:501-504.
- 8  
9  
10 26. Lewis WR, Peterson ED, Cannon CP, et al. An organized approach to improvement  
11 in guideline adherence for acute myocardial infarction: results with the Get With The  
12 Guidelines quality improvement program. *Arch Intern Med*. 2008;168:1813-1819.
- 13  
14  
15 27. Chinese Hospital Association. Manual of single disease quality management.  
16 *Scientific and technical documentation press, Beijing, China*. 2008.
- 17  
18  
19 28. Sun Y, Wang Y, Jiang J, Wang L, Hu D. Renal Dysfunction, CHADS2 Score, and  
20 Adherence to the Anticoagulant Treatment in Nonvalvular Atrial Fibrillation: A  
21 Cross-Sectional Study in Mainland China. *Clin Appl Thromb Hemost*. 2015.
- 22  
23  
24 29. Sun Y, Hu D, Li K, Zhou Z. Predictors of stroke risk in native Chinese with  
25 nonrheumatic atrial fibrillation: retrospective investigation of hospitalized patients.  
26 *Clin Cardiol*. 2009;32:76-81.
- 27  
28  
29 30. Lip GYH, Rushton-Smith SK, Goldhaber SZ, et al. Does Sex Affect Anticoagulant  
30 Use for Stroke Prevention in Nonvalvular Atrial Fibrillation?: The Prospective Global  
31 Anticoagulant Registry in the FIELD-Atrial Fibrillation. *Circulation: Cardiovascular  
32 Quality and Outcomes*. 2015;8:S12-S20.
- 33  
34  
35 31. Huisman MV, Rothman KJ, Paquette M, et al. Antithrombotic Treatment Patterns in  
36 Patients with Newly Diagnosed Nonvalvular Atrial Fibrillation: The GLORIA-AF  
37 Registry, Phase II. *Am J Med*. 2015;128:1306-1313 e1301.
- 38  
39  
40 32. Lip GY, Laroche C, Ioachim PM, et al. Prognosis and treatment of atrial fibrillation  
41 patients by European cardiologists: one year follow-up of the EURObservational  
42 Research Programme-Atrial Fibrillation General Registry Pilot Phase (EORP-AF  
43 Pilot registry). *Eur Heart J*. 2014;35:3365-3376.
- 44  
45  
46 33. Lewis WR, Piccini JP, Turakhia MP, et al. Get With The Guidelines AFIB: novel  
47 quality improvement registry for hospitalized patients with atrial fibrillation. *Circ*



- 1  
2  
3 *Cardiovasc Qual Outcomes*. 2014;7:770-777.
- 4  
5 34. Kakkar AK, Mueller I, Bassand JP, et al. International longitudinal registry of  
6 patients with atrial fibrillation at risk of stroke: Global Anticoagulant Registry in the  
7 FIELD (GARFIELD). *Am Heart J*. 2012;163:13-19 e11.
- 8  
9  
10 35. Piccini JP, Fraulo ES, Ansell JE, et al. Outcomes registry for better informed  
11 treatment of atrial fibrillation: Rationale and design of ORBIT-AF. *American Heart*  
12 *Journal*. 2011;162:606-612.e601.
- 13  
14  
15 36. Lamberts M, Gislason GH, Olesen JB, et al. Oral anticoagulation and antiplatelets in  
16 atrial fibrillation patients after myocardial infarction and coronary intervention. *J Am*  
17 *Coll Cardiol*. 2013;62:981-989.
- 18  
19  
20 37. Piccini JP, Hernandez AF, Zhao X, et al. Quality of care for atrial fibrillation among  
21 patients hospitalized for heart failure. *J Am Coll Cardiol*. 2009;54:1280-1289.
- 22  
23  
24 38. Steinberg BA, Kim S, Piccini JP, et al. Use and associated risks of concomitant  
25 aspirin therapy with oral anticoagulation in patients with atrial fibrillation: insights  
26 from the Outcomes Registry for Better Informed Treatment of Atrial Fibrillation  
27 (ORBIT-AF) Registry. *Circulation*. 2013;128:721-728.
- 28  
29  
30 39. Wieloch M, Sjalander A, Frykman V, Rosenqvist M, Eriksson N, Svensson PJ.  
31 Anticoagulation control in Sweden: reports of time in therapeutic range, major  
32 bleeding, and thrombo-embolic complications from the national quality registry. *Eur*  
33 *Heart J*. 2011;32:2282-2289.
- 34  
35  
36 40. Vinereanu D, Lopes RD, Bahit MC, et al. A multifaceted intervention to improve  
37 treatment with oral anticoagulants in atrial fibrillation (IMPACT-AF): an  
38 international, cluster-randomised trial. *Lancet*. 2017 (in press)  
39 [https://doi.org/10.1016/S0140-6736\(17\)32165-7](https://doi.org/10.1016/S0140-6736(17)32165-7)
- 40  
41  
42  
43  
44  
45  
46  
47  
48  
49  
50  
51  
52  
53  
54  
55  
56  
57  
58  
59  
60

**Authors' contributions:**

The manuscript was prepared on behalf of the CCC-AF Investigators. SS, Y Huo, GF, JG, KT, CM and DZ conceived the study idea. Jing L, Jun L, LM, YG and MZ made substantial contributions to the development of the study protocol. Y Hao drafted the manuscript and all authors contributed to critical revisions of the paper. This final manuscript was read and approved by all authors.

**Funding**

The CCC project is a collaborative program of the AHA and the CSC. The AHA was funded by Pfizer for the quality improvement initiative through an independent grant for learning and change. Pfizer provided no oversight on the goals, execution, or publication of the program. The authors are solely responsible for the design and conduct of this study, all study analyses, the drafting and editing of the manuscript, and its final contents.

**Disclosures**

The authors declare that they have no competing interests.

1  
2  
3 Figure Legends  
4  
5

6 Figure 1. Distribution of hospitals for the CCC-AF program.  
7

8 Numerals on the map indicate the number of hospitals in the area. Adapted from  
9  
10 reference 18.  
11  
12  
13

14 Figure 2. Distribution of CCC-AF composite scores of primary performance measures  
15 across hospitals from February 2015 to March 2017.  
16  
17

18 The composite scores were calculated based on the 6 primary performance measures,  
19 using the sum of total instances when a required measure was performed (correct care  
20 provided) divided by the total number of eligible opportunities.  
21  
22  
23  
24  
25  
26  
27

28 Figure 3. Distribution of CCC-AF composite scores of secondary performance  
29 measures across hospitals from February 2015 to March 2017.  
30  
31

32 The composite scores were calculated based on 8 secondary performance measures,  
33 using the sum of total instances when a required measure was performed (correct care  
34 provided) divided by the total number of eligible opportunities.  
35  
36  
37  
38  
39  
40  
41  
42  
43  
44  
45  
46  
47  
48  
49  
50  
51  
52  
53  
54  
55  
56  
57  
58  
59  
60

1 Table 1. Primary Performance Measures for the CCC-AF Project

| Title of Performance Measure                                                                         | Proportion,%<br>(Numerator/ denominator) |
|------------------------------------------------------------------------------------------------------|------------------------------------------|
| Proportion of patients with nonvalvular AF in whom assessment of thromboembolic risk                 | 23.6 (5384/22864)                        |
| <sup>a</sup> Proportion of AF patients with indication prescribed an anticoagulant drug at discharge | 42.3 (6413/15150)                        |
| Proportion of patients discharged on warfarin who have PT/INR follow-up planned at discharge         | 87.2 (7721/8857)                         |
| <sup>b</sup> Proportion of AF patients with indications receiving ACEI/ARB at discharge              | 53.1 (1794/3382)                         |
| <sup>c</sup> Proportion of AF patients with indication prescribed a beta blocker at discharge        | 57.0 (1245/2184)                         |
| <sup>d</sup> Proportion of AF patients with indication prescribed a statin at discharge              | 61.2 (8524/13925)                        |
| Composite scores of primary performance measures                                                     | 46.8 (31081/66362)                       |

2 PT, prothrombin time; INR, international normalized ratio; ACEI, angiotensin-converting enzyme inhibitor; ARB, angiotensin receptor blocker.

3 <sup>a</sup> indications refer to nonvalvular AF patients with CHA<sub>2</sub>DS<sub>2</sub>-VASc $\geq$ 2

4 <sup>b</sup> indications refer to AF patients with AMI; or coronary heart disease with comorbidity of hypertension, diabetes mellitus or chronic kidney

1  
2  
3  
4  
5  
6  
7  
8  
9  
10  
11  
12  
13  
14  
15  
16  
17  
18  
19  
20  
21  
22  
23  
24  
25  
26  
27  
28  
29  
30  
31  
32  
33  
34  
35  
36  
37  
38  
39  
40  
41  
42  
43  
44  
45  
46  
47

1 disease; or LVEF<40% according to the case records.

2 <sup>c</sup> indications refer to AF patients with heart failure

3 <sup>d</sup> indications refer to AF patients with coronary heart disease, ischemic stroke/TIA, peripheral vascular disease or diabetes mellitus.

For peer review only

1 Table 2. Secondary Performance Measures for the CCC-AF Project

| Title of Performance Measure                                                                          | Proportion,%<br>(Numerator/ denominator) |
|-------------------------------------------------------------------------------------------------------|------------------------------------------|
| Proportion of nonvalvular AF patients who had a CHADS <sub>2</sub> score reported                     | 15.0 (3422/22864)                        |
| Proportion of nonvalvular AF patients who had a CHA <sub>2</sub> DS <sub>2</sub> -VASc score reported | 19.2 (4397/22864)                        |
| Proportion of AF patients who have a documented resting heart rate of <80 bpm closest to discharge    | 65.0 (7140/10989)                        |
| Proportion of AF patients that receiving anticoagulation therapy education                            | 89.4 (10941/12243)                       |
| Proportion of AF patients that receiving conventional medical education                               | 88.3 (25547/28615)                       |
| <sup>a</sup> Proportion of AF patients with indication prescribed aldosterone antagonist at discharge | 72.2 (888/1230)                          |
| Proportion valvular AF patients prescribed warfarin at discharge                                      | 52.4 (2010/3838)                         |
| Proportion of AF patients who are given smoking cessation advice or counseling                        | 22.5 (1263/5623)                         |
| Composite scores of primary performance measures                                                      | 51.4 (55608/108266)                      |

2 AF, atrial fibrillation

3 <sup>a</sup> indications refer to AMI patients with LVEF<40% or heart failure or diabetes mellitus; or the heart failure patients with LVEF<35%.

1 Table 3. Characteristics of Enrolled Patients with AF

|                                    | <b>Men</b>     | <b>Women</b>   | <b>Overall</b> |
|------------------------------------|----------------|----------------|----------------|
|                                    | <b>n=15738</b> | <b>n=13063</b> | <b>n=28801</b> |
| <b>Age</b>                         |                |                |                |
| mean (SD), y                       | 67.0(12.7)     | 70.6(11.2)     | 68.6 (12.1)    |
| <b>Age group, n (%)</b>            |                |                |                |
| <65 y                              | 6528(41.5)     | 3823(29.3)     | 10351(35.9)    |
| 65-74 y                            | 4512(28.7)     | 4079(31.2)     | 8591(29.8)     |
| ≥75 y                              | 4698(29.9)     | 5161(39.5)     | 9859(34.2)     |
| <b>Healthcare insurance, n (%)</b> |                |                |                |
| Urban employees-basic insurance    | 6823(43.4)     | 5045(38.6)     | 11868(41.2)    |
| Urban residents-basic insurance    | 2817(17.9)     | 2782(21.3)     | 5599(19.4)     |
| New rural cooperative insurance    | 2696(17.1)     | 2830(21.7)     | 5526(19.2)     |
| Self-paying                        | 1654(10.5)     | 1186(9.1)      | 2840(9.9)      |
| Others                             | 1748(11.1)     | 1220(9.3)      | 2968(10.3)     |
| <b>Medical history, n (%)</b>      |                |                |                |
| Hypertension                       | 9973(63.4)     | 8874(67.9)     | 18847(65.4)    |
| CAD                                | 5050(32.1)     | 3991(30.6)     | 9041(31.4)     |
| Heart failure                      | 2994(19.0)     | 2788(21.3)     | 5782(20.1)     |
| Diabetes mellitus                  | 2694(17.1)     | 2473(18.9)     | 5167(17.9)     |
| Stroke/TIA                         | 2187(13.9)     | 1843(14.1)     | 4030(14)       |
| PAD                                | 1647(10.5)     | 915(7.0)       | 2562(8.9)      |
| Myocardial infarction              | 1191(7.6)      | 551(4.2)       | 1742(6.0)      |
| Previous bleeding                  | 96(0.6)        | 74(0.6)        | 170(0.6)       |

|                 |            |            |             |
|-----------------|------------|------------|-------------|
| Current smoker  | 5241(33.3) | 413(3.2)   | 5654(19.6)  |
| AF type         |            |            |             |
| Newly diagnosed | 1742(11.1) | 1330(10.2) | 3072(10.7)  |
| Paroxysmal      | 6143(39.0) | 5053(38.7) | 11196(38.9) |
| Persistent      | 4256(27.0) | 3405(26.1) | 7661(26.6)  |
| Permanent       | 2447(15.5) | 2327(17.8) | 4774(16.6)  |
| Unknown         | 1150(7.3)  | 948(7.3)   | 2098(7.3)   |

- 1 AF, atrial fibrillation; SD, standard deviation; CVD, cardiovascular disease; CAD,
- 2 coronary artery disease; PCI, percutaneous coronary intervention; TIA, transient
- 3 ischemic attack; PAD, peripheral artery disease.



1 Table 4. Characteristics of AF Registries Involving Sites in China

| Studies                           | Countries  | Sites | Population           | Sample size | QI measure | Follow up  | Study period  |
|-----------------------------------|------------|-------|----------------------|-------------|------------|------------|---------------|
| Sun Y et al. 2015 <sup>28</sup>   | China only | 50    | Outpatient           | 3017        | No         | No         | 2012          |
| CAFR <sup>12</sup>                | China only | 32    | Outpatient/inpatient | 11496       | No         | Up to 2020 | 2011- present |
| GLORIA-AF II <sup>31</sup>        | 42         | 736   | Outpatient           | 10871       | No         | 2 year     | 2011- present |
| Nanchang AF Project <sup>13</sup> | China only | 1     | Inpatient            | 2442        | No         | No         | 2011-2013     |
| GARFIELD-AF <sup>30</sup>         | 30         | 858   | Outpatient/inpatient | 17184       | No         | 1 year     | 2010-2013     |
| Chinese AF registry <sup>10</sup> | China only | 20    | Emergency department | 2016        | No         | 1 year     | 2008-2011     |
| Sun et al. <sup>29</sup>          | China only | 18    | Inpatient            | 3425        | No         | No         | 2000-2004     |

2 CAFR, Chinese Atrial Fibrillation Registry Study; GLORIA-AF, Global Registry on Long-term Oral Antithrombotic Treatment in Patients with  
 3 Atrial Fibrillation; GARFIELD-AF, Global Anticoagulant Registry in the FIELD-Atrial Fibrillation; QI, quality improvement.

1 Figure 1

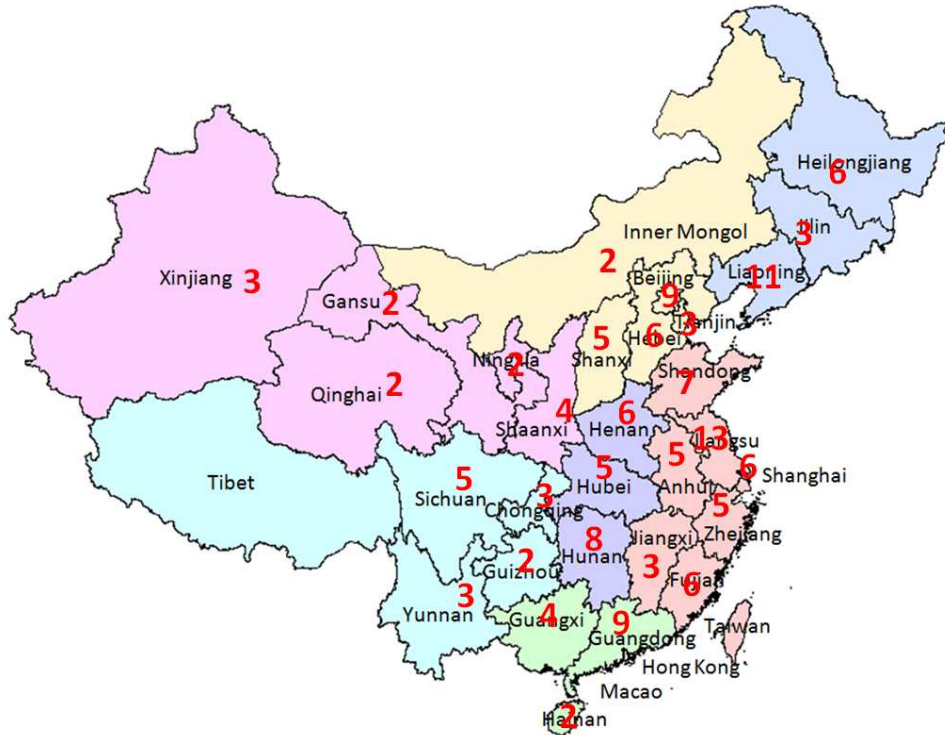

2

3

eviw only

1  
2  
3  
4  
5  
6  
7  
8  
9  
10  
11  
12  
13  
14  
15  
16  
17  
18  
19  
20  
21  
22  
23  
24  
25  
26  
27  
28  
29  
30  
31  
32  
33  
34  
35  
36  
37  
38  
39  
40  
41  
42  
43  
44  
45  
46  
47  
48  
49  
50  
51  
52  
53  
54  
55  
56  
57  
58  
59  
60

1 Figure 2  
2

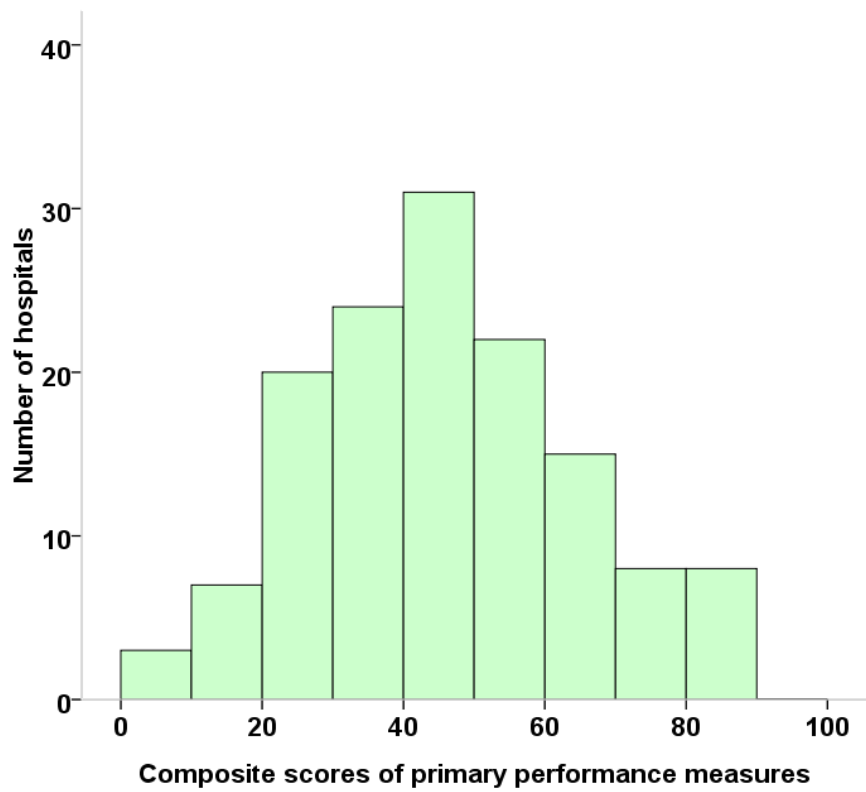

3

view only

1 Figure 3.  
2

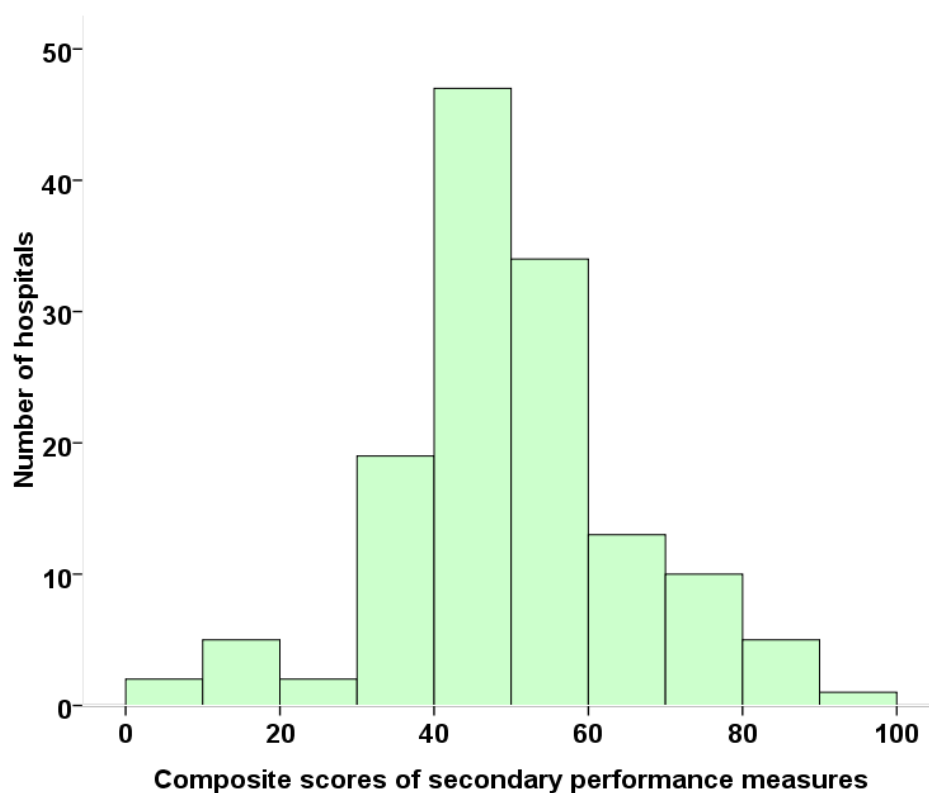

3

# BMJ Open

## Rationale and Design of the Improving Care for Cardiovascular Disease in China (CCC) Project: A National Registry to Improve Management of Atrial Fibrillation

|                                 |                                                                                                                                                                                                                                                                                                                                                                                                                                                                                                                                                                                                                                                                                                                                                                                                                                                                                                                                                                                                                                                                                                                                                                                                                                                                                                                                                                                                                                                                                                                                                                                                                                                                                                                            |
|---------------------------------|----------------------------------------------------------------------------------------------------------------------------------------------------------------------------------------------------------------------------------------------------------------------------------------------------------------------------------------------------------------------------------------------------------------------------------------------------------------------------------------------------------------------------------------------------------------------------------------------------------------------------------------------------------------------------------------------------------------------------------------------------------------------------------------------------------------------------------------------------------------------------------------------------------------------------------------------------------------------------------------------------------------------------------------------------------------------------------------------------------------------------------------------------------------------------------------------------------------------------------------------------------------------------------------------------------------------------------------------------------------------------------------------------------------------------------------------------------------------------------------------------------------------------------------------------------------------------------------------------------------------------------------------------------------------------------------------------------------------------|
| Journal:                        | <i>BMJ Open</i>                                                                                                                                                                                                                                                                                                                                                                                                                                                                                                                                                                                                                                                                                                                                                                                                                                                                                                                                                                                                                                                                                                                                                                                                                                                                                                                                                                                                                                                                                                                                                                                                                                                                                                            |
| Manuscript ID                   | bmjopen-2017-020968.R1                                                                                                                                                                                                                                                                                                                                                                                                                                                                                                                                                                                                                                                                                                                                                                                                                                                                                                                                                                                                                                                                                                                                                                                                                                                                                                                                                                                                                                                                                                                                                                                                                                                                                                     |
| Article Type:                   | Protocol                                                                                                                                                                                                                                                                                                                                                                                                                                                                                                                                                                                                                                                                                                                                                                                                                                                                                                                                                                                                                                                                                                                                                                                                                                                                                                                                                                                                                                                                                                                                                                                                                                                                                                                   |
| Date Submitted by the Author:   | 03-Mar-2018                                                                                                                                                                                                                                                                                                                                                                                                                                                                                                                                                                                                                                                                                                                                                                                                                                                                                                                                                                                                                                                                                                                                                                                                                                                                                                                                                                                                                                                                                                                                                                                                                                                                                                                |
| Complete List of Authors:       | <p>Hao, Yongchen; Beijing An Zhen Hospital, Capital Medical University, Beijing Institute of Heart, Lung and Blood Vessel Diseases, Department of Epidemiology</p> <p>Liu, Jing; Beijing Anzhen Hospital, Capital Medical University; Beijing Institute of Heart, Lung &amp; Blood Vessel Diseases , Department of Epidemiology</p> <p>Smith, Sidney; University of North Carolina, Division of Cardiology</p> <p>Huo, Yong ; Peking University First Hospital, Department of Cardiology</p> <p>Fonarow, Gregg; University of California Los Angeles, Divisions of Cardiology</p> <p>Ge, Junbo; Shanghai Institute of Cardiovascular Diseases, Zhongshan Hospital, Fudan University, Department of Cardiology</p> <p>Liu, Jun; Beijing Anzhen Hospital, Capital Medical University, Beijing Institute of Heart, Lung and Blood Vessel Diseases, Beijing, China, Department of Epidemiology</p> <p>Taubert, Kathryn; American Heart Association, Department of Global Strategies</p> <p>Morgan, Louise; American Heart Association, International Quality Improvement Department</p> <p>Guo, Yang; Beijing Anzhen Hospital, Capital Medical University, Beijing Institute of Heart, Lung and Blood Vessel Diseases, Beijing, China, Department of Epidemiology</p> <p>Zhou, Mengge; Beijing Anzhen Hospital, Capital Medical University, Beijing Institute of Heart, Lung and Blood Vessel Diseases, Beijing, China, Department of Epidemiology</p> <p>Zhao, Dong; Beijing Anzhen Hospital, Capital Medical University; Beijing Institute of Heart, Lung &amp; Blood Vessel Diseases , Department of Epidemiology</p> <p>Ma, Chang-Sheng; Beijing AnZhen Hospital, Capital Medical University, Department of Cardiology</p> |
| <b>Primary Subject Heading</b>: | Cardiovascular medicine                                                                                                                                                                                                                                                                                                                                                                                                                                                                                                                                                                                                                                                                                                                                                                                                                                                                                                                                                                                                                                                                                                                                                                                                                                                                                                                                                                                                                                                                                                                                                                                                                                                                                                    |
| Secondary Subject Heading:      | Epidemiology                                                                                                                                                                                                                                                                                                                                                                                                                                                                                                                                                                                                                                                                                                                                                                                                                                                                                                                                                                                                                                                                                                                                                                                                                                                                                                                                                                                                                                                                                                                                                                                                                                                                                                               |
| Keywords:                       | Atrial fibrillation, quality improvement, healthcare, registry study                                                                                                                                                                                                                                                                                                                                                                                                                                                                                                                                                                                                                                                                                                                                                                                                                                                                                                                                                                                                                                                                                                                                                                                                                                                                                                                                                                                                                                                                                                                                                                                                                                                       |
|                                 |                                                                                                                                                                                                                                                                                                                                                                                                                                                                                                                                                                                                                                                                                                                                                                                                                                                                                                                                                                                                                                                                                                                                                                                                                                                                                                                                                                                                                                                                                                                                                                                                                                                                                                                            |

1  
2  
3  
4  
5  
6  
7  
8  
9  
10  
11  
12  
13  
14  
15  
16  
17  
18  
19  
20  
21  
22  
23  
24  
25  
26  
27  
28  
29  
30  
31  
32  
33  
34  
35  
36  
37  
38  
39  
40  
41  
42  
43  
44  
45  
46  
47  
48  
49  
50  
51  
52  
53  
54  
55  
56  
57  
58  
59  
60

SCHOLARONE™  
Manuscripts

For peer review only

**Rationale and Design of the Improving Care for Cardiovascular Disease in  
China (CCC) Project:**

**A National Registry to Improve Management of Atrial Fibrillation**

Yongchen Hao,<sup>1</sup> Jing Liu,<sup>1</sup> Sidney C. Smith Jr,<sup>2</sup> Yong Huo,<sup>3</sup> Gregg C. Fonarow,<sup>4</sup>  
Junbo Ge,<sup>5</sup> Jun Liu,<sup>1</sup> Kathryn A. Taubert,<sup>6</sup> Louise Morgan,<sup>7</sup> Yang Guo,<sup>1</sup> Mengge  
Zhou,<sup>1</sup> Dong Zhao,<sup>1</sup> \*Changsheng Ma,<sup>8</sup> on behalf of the CCC-AF Investigators

<sup>1</sup> Department of Epidemiology, Beijing An Zhen Hospital, Capital Medical  
University, Beijing Institute of Heart, Lung and Blood Vessel Diseases, Beijing,  
China

<sup>2</sup> Division of Cardiology, University of North Carolina, Chapel Hill, NC, USA

<sup>3</sup> Department of Cardiology, Peking University First Hospital, Beijing, China

<sup>4</sup> Divisions of Cardiology, Geffen School of Medicine at University of California, Los  
Angeles, CA, USA

<sup>5</sup> Department of Cardiology, Shanghai Institute of Cardiovascular Diseases,  
Zhongshan Hospital, Fudan University, Shanghai, China

<sup>6</sup> Department of Global Strategies, American Heart Association, Basel, Switzerland

<sup>7</sup> International Quality Improvement Department, American Heart Association,  
Dallas, TX, USA

<sup>8</sup> Department of Cardiology, Beijing Anzhen Hospital, Capital Medical University,  
Beijing, China

Short title: Rationale and Design of CCC-AF

1  
2  
3 \* Corresponding author:  
4

5 Dr. Changsheng Ma  
6

7 Department of Cardiology,  
8

9 Beijing Anzhen Hospital, Capital Medical University,  
10

11 No. 2 Anzhen Road, Chaoyang District, Beijing 100029, China.  
12

13 Tel: +86-10-64456412  
14

15 Fax: +86-10-64456078  
16

17 E-mail: chshma@vip.sina.com.  
18  
19  
20  
21  
22  
23  
24  
25  
26  
27  
28  
29  
30  
31  
32  
33  
34  
35  
36  
37  
38  
39  
40  
41  
42  
43  
44  
45  
46  
47  
48  
49  
50  
51  
52  
53  
54  
55  
56  
57  
58  
59  
60



## Abstract

**Introduction:** Inadequate management of patients with atrial fibrillation (AF) has been reported in China for anticoagulation therapy and treatment for concomitant diseases. An effective quality improvement program has been lacking to promote the use of evidence-based treatments and improve outcome in patients with AF.

**Methods and analysis:** The Improving Care for Cardiovascular Disease in China (CCC)-AF program is a collaboration of the American Heart Association and the Chinese Society of Cardiology. This program is designed to promote adherence to AF guideline recommendations and outcomes for inpatients with AF. Launched in February 2015, 150 hospitals are recruited by geographic-economic regions across 30 provinces in China. Each month, 10-20 inpatients with AF are enrolled in each hospital. A web-based data collection platform is used to collect clinical information for patients with AF, including patients' demographics, admission information, medical history, in-hospital care and outcomes, and discharge medications for managing AF. The quality improvement initiative includes monthly benchmarked reports on hospital quality, training sessions, regular webinars, and recognitions of hospital quality achievement. Primary analyses will include adherence to performance measures and guidelines. To address intra-hospital correlation, generalized estimating equation models will be applied. As of March 2017, 28 801 AF inpatients have been enrolled.

**Ethics and dissemination:** This study protocol was approved by the Ethics Committee of Beijing Anzhen Hospital, Capital Medical University. Results will be published in peer-reviewed medical journals.

**Trial registration:** NCT02309398 ([www.clinicaltrials.gov](http://www.clinicaltrials.gov)).

1  
2  
3 **Key words:** Atrial fibrillation, quality improvement, healthcare, registry study  
4  
5  
6  
7

8 **Strengths and limitations of this study**  
9

- 10  
11 • CCC-AF is a nationwide quality improvement project with tools including  
12 monthly benchmarked reports on hospital quality, training sessions, regular  
13 webinars, and recognition for quality achievement.  
14  
15  
16  
17 • Data accuracy and completeness of this study is ensured by training sessions,  
18 standardized web-based data collection tool, onsite quality control and  
19 monitoring of data completeness.  
20  
21  
22  
23  
24 • Experience from this program will help to guide development of the national  
25 health quality improvement system.  
26  
27  
28 • Participation is voluntary and only tertiary hospitals are recruited in the CCC-AF  
29 program, which may not be able to represent the care quality for the China  
30 overall.  
31  
32  
33  
34  
35  
36  
37  
38  
39  
40  
41  
42  
43  
44  
45  
46  
47  
48  
49  
50  
51  
52  
53  
54  
55  
56  
57  
58  
59  
60

## INTRODUCTION

As the commonest sustained arrhythmia, atrial fibrillation (AF) is responsible for major morbidity and health care costs. It is associated with a 4–5-fold increased risk for stroke, a 40%–90% increased risk for overall mortality, and impaired quality of life.<sup>1-2</sup> The prevalence of AF is estimated to be 0.77% in China, and more than 5 million Chinese adults aged older than 35 years currently have AF.<sup>3-6</sup> There is wide availability of evidence-based guidelines with effective treatments for improving outcomes of AF.<sup>7-9</sup> However, poor compliance with evidence-based therapies have been reported in China, including assessment of thromboembolic risk, anticoagulation therapy, heart rate control, rhythm control, and adequate treatment of concomitant diseases.<sup>10,11</sup> Several studies with diversified methodologies have reported that more than 60% of patients with AF that eligible for anticoagulant treatment receive no risk stratification for stroke or therapy.<sup>10-13</sup>

Although previous registries have expanded understanding of clinical practice of AF in China, they have been limited in the representativeness of hospitals and lack of quality improvement components.<sup>10,12,13</sup> To promote the use of guidelines of recommended therapies and to assess the performance of quality improvement efforts, the Chinese Society of Cardiology (CSC) and the American Heart Association (AHA) initiated the Improving Care for Cardiovascular Disease in China (CCC) project – AF program. The CCC-AF is on the Get With The Guidelines (GWTG) initiative of AHA.<sup>14</sup> As a quality improvement initiative with timely feedback for care of patients with AF, CCC-AF will enhance the quality of care for AF through furnishing specially designed tools for quality improvement.

This paper aims to present the objectives, organizational framework and governance, hospital and patient enrollment, data collection, quality improvement

1  
2  
3 tools for AF care, and current progress of the CCC-AF program.  
4

## 5 **METHODS**

### 6 **Study objectives**

7  
8  
9  
10 The CCC-AF program aims to promote implementation of guideline-recommended  
11 therapies for AF patients using rapid cycle of data collection, analysis, feedback, and  
12 process improvement. The objectives of the CCC-AF program include understand the  
13 current situation and main problems for management of AF inpatients , assess the  
14 performance of the current strategy on quality improvement for AF management, as  
15 well as explore and refine the optimal approach to improve clinical management of  
16 AF. The timing and dynamic monitoring of AF management will provide an  
17 opportunity to identify the potential needs of further evidence in management of AF.  
18 Experience from this program may also help to guide development of the national  
19 health quality improvement system and provide a blueprint for adaptation to other  
20 regions of the world.  
21  
22  
23  
24  
25  
26  
27  
28  
29  
30  
31  
32  
33  
34

### 35 **Organizational framework and governance**

36  
37  
38 As a collaborative project of the CSC and the AHA , the CCC-AF is conducted by the  
39 Beijing Institute of Heart, Lung and Blood Vessel Diseases. AHA secured the initial  
40 project funding and CSC provided hospital network for CCC-AF. As a continuous  
41 quality improvement program launched in February 2015, CCC-AF has secured its  
42 funding up to December 2018. This program consists of a senior management group  
43 (SMG) and a project management group (Figure S1). Six senior clinician volunteers  
44 from AHA (Prof. Smith, Prof. Fonarow and Prof. Taubert) and CSC (Prof. Huo, Prof.  
45 Ge and Prof. Ma) in the SMG communicate frequently via teleconferences, emails  
46 and face-to-face meetings to ensure the scientific integrity and supervise the  
47  
48  
49  
50  
51  
52  
53  
54  
55  
56  
57  
58  
59  
60

1  
2  
3 implementation of the CCC-AF program. Under the leadership of the international  
4 and national directors (Ms. Morgan and Prof. Zhao), the project management group  
5 oversees the operation of the CCC-AF project. The project coordinator (Prof. Jing  
6 Liu) supervises for functional groups, namely daily routine management (Ms. Jun Liu  
7 and Ms. Zhou), data (Dr. Hao and Ms. Guo), and advisory and education groups. Data  
8 collection and analysis are managed by daily routine management group and data  
9 group, with guidance from SMG. Researchers from SMG, daily routine management  
10 group and participating hospitals have the access to analysis the data for publications.  
11  
12  
13  
14  
15  
16  
17  
18  
19

### 20 **Hospital recruitment**

21  
22  
23 Hospitals were recruited by geographic-economic regions<sup>15</sup> and the detailed hospital  
24 sampling frame is shown in Supplemental Table 1. A total of 150 hospitals were  
25 recruited, accounting for about 10% of the tertiary hospitals in China. Tertiary  
26 hospitals in the CCC- AF program meet following criteria: (1) the annual number of  
27 patients hospitalized with AF was over 120; and (2) the director of the Cardiology  
28 Department agreed to join the program. Traditional Chinese medicine hospitals and  
29 specialized hospitals without cardiology wards were not included in CCC-AF  
30 program. Supplemental Table 2 and Supplemental Table 3 provide the information of  
31 the 150 CCC - AF hospitals recruited in phases one and two.  
32  
33  
34  
35  
36  
37  
38  
39  
40  
41  
42

### 43 **Patient recruitment**

44  
45  
46 In each hospital, the first 10-20 hospitalized patients with AF are enrolled in a  
47 consecutive manner. Study inclusion of AF is based on electrocardiograph results,  
48 which are recorded by 12-lead electrocardiography (ECG), 24-hour Holter ECG , or  
49 other cardiac rhythm monitors. Patients with AF secondary to reversible condition  
50 (e.g., untreated thyroid disease and pulmonary embolism) are excluded from the  
51  
52  
53  
54  
55  
56  
57  
58  
59  
60

1  
2  
3 study.

4  
5 Clinical data elements are collected referring to American College of Cardiology  
6 (ACC)/AHA recommendations on the data standards for clinical research of AF.<sup>16,17</sup>  
7  
8 As a quality improvement initiative, the CCC-AF program has high priority for  
9 collection of data elements that are involved in assessment for quality of care.  
10  
11 Moreover, additional data elements are gathered to facilitate in-depth analysis. Data  
12 elements include patients' demographics, admission information, medical history, in-  
13 hospital care and outcomes, and discharge medications for management of AF, as  
14 presented in the case report form (Supplemental Table 4). Collection of personal  
15 identifiers allows the potential for linking our dataset to other health records including  
16 death and hospitalization data in the future. Eligible patients with AF are reported to  
17 the database using Oracle Clinical Remote Data Capture system (Oracle Corporation).  
18 Each participating center assigns a data abstractor responsible for data collection. The  
19 data abstractor collects the clinical information from medical records and enter it into  
20 the online data reporting system before middle of the month after discharge of the  
21 patient.  
22  
23  
24  
25  
26  
27  
28  
29  
30  
31  
32  
33  
34  
35  
36  
37

### 38 **Quality control of data collection**

39  
40 Similar to the CCC-Acute Coronary Syndrome (ACS) program,<sup>18</sup> four approaches  
41 are adopted to secure the accuracy and completeness of data in the CCC-AF  
42 program. (1) Face-to-face training workshops are conducted prior to the data entry,  
43 with interpretations for each data item. (2) The standardized online reporting tool  
44 checks the data automatically for invalid values and sends the system generated error  
45 messages to data abstractor for validation. (3) Onsite quality control from the third  
46 party is performed to ensure the data accuracy. Recruited cases are compared with  
47 the inpatient list to make sure that cases are reported in a consecutive manner, and  
48  
49  
50  
51  
52  
53  
54  
55  
56  
57

1  
2  
3 five percent of the records are chosen at random for comparison with the medical  
4 charts. (4) Data completeness is calculated as number of data elements filled in the  
5 database divided by number of data elements that should be filled. Each month, data  
6 completeness is inspected and sent to participating sites as feedback in the monthly  
7 reports. For hospitals with data completeness less than 90%, local investigators are  
8 contacted to improve quality of data.  
9  
10  
11  
12  
13  
14

### 15 16 **Performance measures**

17  
18 Primary and secondary performance measures are designed to evaluate the quality of  
19 care for patients hospitalized with AF in the CCC-AF program. They are constructed  
20 referring to the ACC/AHA statements on AF performance measures<sup>19-21</sup> integrating  
21 recommendations from the most updated ACC/AHA guideline and Chinese statement  
22 for AF.<sup>7,22</sup> The six primary performance measures are assessment of thromboembolic  
23 risk, anticoagulant drug at discharge, prothrombin time (PT)/ international  
24 normalized ratio (INR) planned follow-up, angiotensin-converting enzyme inhibitor  
25 (ACEI)/ angiotensin receptor blocker (ARB), statins and beta-blockers at discharge  
26 in AF inpatients with indications (Table 1). The full measure specifications are  
27 shown in Supplemental Table 5. Eight secondary performance measures are shown in  
28 Table 2 with their full measure specifications shown in Supplemental Table 6. For  
29 each performance measure, specialized inclusion and exclusion criteria are utilized  
30 and only appropriate tolerable patients with no contraindications are counted as  
31 denominators.  
32  
33  
34  
35  
36  
37  
38  
39  
40  
41  
42  
43  
44  
45  
46  
47  
48

49  
50 The hospital composite scores of primary performance measure are constructed  
51 using an opportunity-based method. These scores are defined as the total number of  
52 treatments correctly given divided by the sum of eligible opportunity of treatments  
53  
54  
55  
56  
57  
58  
59  
60

1  
2  
3 among the six primary performance measures.<sup>23</sup> Patients at a CCC-AF hospital  
4 contribute eligible opportunities for care to the composite performance scores of this  
5 hospital. In the same way, the composite score for secondary performance measures is  
6 constructed using the eight secondary performance measures.  
7  
8  
9  
10

11  
12 The CCC team will update the performance measures and keep them aligned with  
13 the new or updated clinical guidelines for management of AF when necessary. After  
14 the new or updated AF guidelines are released, clinical experts will evaluate whether  
15 applying these changes in guidelines to CCC-AF performance measures and data  
16 elements associated with them in the case report form is necessary. When changes are  
17 adopted in the performance measures, hospitals have a transition period that allows  
18 them to have flexibility in meeting recognition criteria for the update.  
19  
20  
21  
22  
23  
24  
25  
26  
27

### 28 **Quality improvement tools**

29  
30 Several quality improvement tools are designed to promote the adherence to AF  
31 guidelines including monthly hospital quality report, annual hospital recognition,  
32 training session, as well as online educational materials.  
33  
34  
35  
36  
37

#### 38 ***Monthly hospital quality report***

39  
40 Each month, hospitals receive site-specific feedback reports on quality of care for AF  
41 through the CCC website. The content of hospital quality report includes individual  
42 and composite scores for primary and secondary performance measures, as well as  
43 data completeness of the reported AF cases. External and internal benchmarks are  
44 provided and compared with the hospital-specific data in the report. External  
45 benchmarks are designed to present rational nation level of performance thresholds  
46 and help to find out the areas for further enhancement of performance. The monthly  
47 hospital quality report provides two external benchmarks: the nation-level  
48  
49  
50  
51  
52  
53  
54  
55  
56



1  
2  
3 benchmark and the attainable benchmark of performance describing the composite  
4 performance of care delivered by the 15% hospitals with top-performing. Internal  
5 benchmark presents the time trend of performance measures using hospital specific  
6 data. These benchmarking quality reports help hospitals to identify areas for  
7 improvement and refine treatment processes to ensure they are in line with the  
8 guidelines. Frequencies of website visit and download are recorded to assess  
9 involvement of these participating hospitals.  
10  
11  
12  
13  
14  
15  
16

### 17 ***Regional workshop***

18  
19  
20  
21 Regional workshops in line with CSC meetings occur once or twice each year to  
22 outline the project update, exchange experience, consult the obstacles confronted,  
23 and share the most recent advances in therapies of AF. These face-to-face meetings  
24 serve as venues where the knowledge are shared, with discussion forums enabling  
25 delegates to identify personal and local actions needed to improve clinical practice  
26 for AF. Recourses for education of AF healthcare professionals, including handout,  
27 bulletin, pocket guideline and booklet are delivered to attendees.  
28  
29  
30  
31  
32  
33  
34  
35  
36

### 37 ***Hospital recognition***

38  
39  
40 Participating hospitals with best practice are awarded during the annual scientific  
41 sessions of CSC. Six types of awards are issued each year, including gold, silver, and  
42 bronze prizes for AF performance measures, and recognitions for active  
43 participation, progress, and data quality. Recognition criteria are the same as those in  
44 the CCC-ACS program.<sup>18</sup> Hospitals with best practice share their processes behind  
45 the achievement of good clinical practice for AF.  
46  
47  
48  
49  
50  
51  
52

### 53 ***Online educational materials***

54  
55  
56 The CCC website provides a variety of online educational materials in the education  
57  
58  
59  
60

1  
2  
3 source center for healthcare professionals in the participating hospitals to view and  
4  
5 download. These web-based training materials include updated clinical guidelines and  
6  
7 scientific statements for AF and webinars. Webinars are specially designed by clinical  
8  
9 experts, focusing on the areas with gaps between clinical practice and guideline  
10  
11 recommendations identified in the program.  
12

### 13 14 **Data management**

15  
16 Data reported by hospitals is reserved at the central office in solidly protected  
17  
18 computer systems. Data managers perform regular data cleaning inspecting for the  
19  
20 potential illogical and invalid values. Invalid values are defined as outliers in numeric  
21  
22 variables and unexpected values in character variables. Once the data manager detect  
23  
24 the illogical and invalid values, they will review the related observations and trace to  
25  
26 solve the potential errors.  
27  
28

### 29 30 **Statistical considerations**

31  
32 Recruitment of 1500 patients (10 in each of the 150 hospitals) with AF per month will  
33  
34 detect an improvement in the primary composite score from 45% at baseline to an  
35  
36 expected score of 51%, with 91% power in a two-sided test with a significant level of  
37  
38 0.05. The projected 6% improvement (from 45% to 51%) in primary composite score  
39  
40 means that more 6% guideline recommended treatments will be correctly given for  
41  
42 AF patients. Researchers from SMG, project management group and participating  
43  
44 hospitals have the access to analysis the data in a de-identified way, in both hospital  
45  
46 level and patient level. Categorical variables are presented as frequencies and  
47  
48 percentages and continuous variables are as means and standard deviations or  
49  
50 medians and interquartile ranges. Missing data are managed based on the purpose of  
51  
52 the study and analysis method used. The chi-square trend test is performed to evaluate  
53  
54  
55  
56  
57

1  
2  
3 the temporal trend of performance measures. Univariate and multi-variable analysis  
4 are performed to recognize the element related with outcomes concerned, e.g. the  
5 implement of specific treatments and in-hospital events. To address intra-hospital  
6 correlation, generalized estimating equation models will be applied. All statistical  
7 analyses are performed by SAS version 9.2 (SAS Institute, Inc., Cary, North  
8 Carolina). Two-sided  $P$  values  $< 0.05$  are considered statistically significant.

### 16 **Progress to date**

19 A total of 150 tertiary hospitals were recruited into the program in two phases, with  
20 96 (64%) sites in municipalities or provincial capitals, and 54 (36%) in regional  
21 cities. The locations of participating centers are displayed in Figure 1. A total of 28  
22 801 AF inpatients were recruited from February 2015 to March 2017. The  
23 demographic and clinical information of the overall population is presented in Table  
24 3. The mean age of the population was 68.6 years and 15 738 (54.6%) were men.  
25 These patients had high prevalence of the concomitant diseases, including  
26 hypertension (65.4%), coronary artery disease (31.4%), heart failure (20.1%) and  
27 diabetes mellitus (17.9%).

29  
30  
31  
32  
33  
34  
35  
36  
37  
38  
39 The composite score for primary performance measures was 46.8% in the AF  
40 patients recruited (Figure 2). There were remarkable variations in composite scores  
41 for AF across centers, ranging from 8.2% to 89.4%. The composite score of the AF  
42 secondary performance measures for all hospitals was 51.4%, with a wide range of  
43 1.8%–96.2% (Figure 3). Table 1 and Table 2 present the adherence rates to each of  
44 the primary and secondary performance measures. Hospital-specific AF monthly  
45 quality reports between February 2015 and March 2017 are deposited on the website  
46 ([www.ccc-heart.com](http://www.ccc-heart.com)).

### **Patient and public involvement**

Public and patients have not been engaged in proposal of the research question, design, recruitment and implement of the study. The results will be dispersed to study participants by public reporting.

### **DISCUSSION**

The growing population with AF and expanded awareness of AF related mortality, morbidity and impaired quality of life lead to development of further therapies for AF. Currently, there are several evidence-based, highly effective, guidelines of recommended therapies that can significantly improve long-term care outcomes. The ACC, AHA and European Society of Cardiology have compiled these treatments into clinical practice guidelines.<sup>7,8</sup> Although these guidelines are widely available, studies have suggested that the compliance with guideline-recommended treatments is low in China, even among tertiary hospitals.<sup>10,11</sup> Reasons for low compliance to guideline-based therapies include a lack of timely feedback, poor communication, and a lack of knowledge, financial resource, or time.<sup>24,25</sup>

Accordingly, multiple strategies for improving adherence for clinical guideline are developed. Among them, three strategies are widely used, which are increasing reporting of the data, offering incentives to increase adherence for guideline, and providing hospitals and healthcare professionals with framework and instruments which are essential for adherence improvement.<sup>26</sup> In 2008, the National Health and Family Planning Commission of China (currently known as National Health Commission) launched a project for quality management of single diseases for heart failure, acute myocardial infarction and coronary artery bypass grafting. This project aimed to enhance the reporting of these diseases and promote improvement in

1  
2  
3 quality.<sup>27</sup> However, reporting without timely feedback and a lack of necessary  
4  
5 infrastructure for quality improvement prevented quality management of this single  
6  
7 diseases program from effective improvement in care.  
8  
9

10 Previous registry studies have provided information on clinical management of  
11  
12 patients with AF in China (Table 4)<sup>10,12,13,28-31</sup> and worldwide.<sup>31-35</sup> Zhang et al  
13  
14 enrolled 2016 patients with AF in 20 hospitals from 2008 to 2011.<sup>10</sup> Among patients  
15  
16 with non-valvular AF, only 12.7% of those with a CHADS<sub>2</sub> score of  $\geq 2$  received  
17  
18 treatments with oral anticoagulants, which was much lower than that in developed  
19  
20 countries reported by international registries.<sup>32,36-39</sup> As an ongoing registry, the  
21  
22 Chinese Atrial Fibrillation Registry was launched in 2011 with an enrollment goal of  
23  
24 20,000 patients with AF in Beijing from 32 hospitals, with a follow-up of every six  
25  
26 months up to 2020.<sup>12</sup> Although these registries have expanded understanding for  
27  
28 clinical practice and long-term outcomes of AF, they have been limited in a finite  
29  
30 number of hospitals and lack of quality improvement components.  
31  
32  
33

34 In 2014, the AHA and CSC launched the CCC-AF program, aiming to promote  
35  
36 the quality of care for AF using timely feedback and quality improvement tools. The  
37  
38 CCC-AF program is similar to the CCC-ACS program.<sup>18</sup> This program will contribute  
39  
40 essential nationwide information regarding characteristic, management and in-hospital  
41  
42 outcomes of AF inpatients. It supports hospitals for improvement in use of guideline-  
43  
44 recommended treatments with providing hospital-specific monthly quality reports.  
45  
46 Targeted tools, including regional workshops and webinars, can further help to  
47  
48 narrow the gaps identified between clinical practice and guideline recommendations.  
49  
50 As an ongoing registry, the CCC-AF program have the potential to track the  
51  
52 expansion of new evidence-based therapies and highlight the fields calling for  
53  
54 additional quality improvement efforts.  
55  
56  
57

1  
2  
3 The CCC-AF program aims to improve implement of guideline-recommended  
4 therapies for AF with multiple quality improvement tools. As shown in the improve  
5 treatment with oral anticoagulants in atrial fibrillation (IMPACT-AF) study,  
6  
7 educational intervention with integrative education increased the percentage of  
8  
9 patients receiving oral anticoagulant treatments and can potentially improve stroke  
10  
11 prevention for patients with AF.<sup>40</sup> Currently, guideline-based therapies for AF mainly  
12  
13 focus on antithrombotic management, rate and rhythm control, and therapy of  
14  
15 concomitant cardiac diseases. For antithrombotic management, risk stratification is an  
16  
17 essential step for recognizing candidate patients for therapy and deciding which  
18  
19 patients have sufficient risk to warrant oral anticoagulation. Quality improvement  
20  
21 tools of the CCC-AF program are designed to prompt assessment of thromboembolic  
22  
23 risk based on easily used risk stratification scores, as well as the use of anticoagulant  
24  
25 drugs at discharge, PT/INR planned follow-up, and therapy of concomitant cardiac  
26  
27 diseases using ACEIs/ARBs, beta-blockers, and statins at discharge in AF patients  
28  
29 with indications. Because AF patients are usually admitted with concomitant  
30  
31 cardiovascular diseases, careful consideration of co-prescription of anticoagulant and  
32  
33 antiplatelet therapies is warranted, balancing the risk of stroke and bleeding. The  
34  
35 CCC-AF program will provide important insight for patterns of current clinical  
36  
37 practice for patients with AF and concomitant cardiovascular diseases (e.g., ACS) and  
38  
39 procedures (e.g., percutaneous coronary intervention).  
40  
41  
42  
43  
44  
45

46 The CCC-AF program has several strengths, including involvement of  
47  
48 international research team and nationwide network of tertiary hospitals. It helps to  
49  
50 translate the research findings into action of quality improvement for care of AF. In  
51  
52 China, tertiary hospitals deliver top-level healthcare and affect clinical practice in  
53  
54 primary and secondary healthcare facilities. Quality improvement in these tertiary  
55  
56  
57  
58  
59  
60

1  
2  
3 hospitals will lead to spreading the experience to healthcare facilities of other levels  
4 and promote the diffusion of guideline-recommended therapies. Moreover, data  
5 quality of our study is ensured by multiple strategies including training, standardized  
6 data collection platform, onsite quality control and monitoring of data completeness.  
7  
8  
9  
10

11  
12 There are several limitations of CCC-AF program that should be mentioned.  
13  
14 Participation is voluntary and only tertiary hospitals are enrolled in this study. These  
15 centers tend to be bigger hospitals possessing more resources, which may  
16 overestimate the care quality. While participating centers are trained to report the  
17 eligible AF patients consecutively, selection bias may exist as it is challenging to  
18 identify all AF patients in an accurate and uniform manner. As clinical information are  
19 abstracted from inpatient records, quality of documentation has potential impact on  
20 the current study. Moreover, CCC-AF program only collects information during  
21 hospitalization, future work tracking patients after discharge will promote further  
22 researches regarding effectiveness of specific treatments on long-term outcomes.  
23 Also, results presented here are preliminary and should be interpreted with caution.  
24  
25  
26  
27  
28  
29  
30  
31  
32  
33  
34  
35

36 As a nationwide quality improvement program, CCC-AF aims to provide an  
37 opportunity to improve implement of guideline-recommended therapies in managing  
38 AF. This program has diversified tools for quality improvement which could improve  
39 patients' outcomes.  
40  
41  
42  
43  
44

#### 45 **Ethics and dissemination**

46  
47 This study has been approved by the by the Ethics Committee of Beijing Anzhen  
48 Hospital, with the waiver of patient consent. One hundred and eleven hospitals  
49 accepted central ethics approval and the other 39 sites applied IRB approval from  
50 their own ethics committees. The protocol is listed on [www.clinicaltrials.gov](http://www.clinicaltrials.gov)  
51  
52  
53  
54  
55  
56  
57

1  
2  
3 (NCT02309398). Results will be published in peer-reviewed medical journals.  
4

5  
6 **Acknowledgments**  
7

8 We thank all the researchers from 150 participating centers. Names of the principal  
9  
10 investigators and participating centers are presented in Supplemental Table 2 and  
11  
12 Supplemental Table 3.  
13  
14  
15  
16  
17  
18  
19  
20  
21  
22  
23  
24  
25  
26  
27  
28  
29  
30  
31  
32  
33  
34  
35  
36  
37  
38  
39  
40  
41  
42  
43  
44  
45  
46  
47  
48  
49  
50  
51  
52  
53  
54  
55  
56  
57  
58  
59  
60

For peer review only



**REFERENCES**

1. Wolf PA, Abbott RD, Kannel WB. Atrial fibrillation as an independent risk factor for stroke: the Framingham Study. *Stroke*. 1991;22:983-988.
2. Benjamin EJ, Wolf PA, D'Agostino RB, Silbershatz H, Kannel WB, Levy D. Impact of atrial fibrillation on the risk of death: the Framingham Heart Study. *Circulation*. 1998;98(10):946-952.
3. Hu D, Sun Y. Epidemiology, risk factors for stroke, and management of atrial fibrillation in China. *J Am Coll Cardiol*. 2008;52:865-868.
4. Zhou Z, Hu D, Chen J, Zhang R, Li K, Zhao X. An epidemiological survey of atrial fibrillation in China. *Chinese Journal of Internal Medicine*. 2004;43:491-494.
5. Li Y, Wu YF, Chen KP, et al. Prevalence of atrial fibrillation in China and its risk factors. *Biomed Environ Sci*. 2013;26(9):709-716.
6. Guo Y, Tian Y, Wang H, Si Q, Wang Y, Lip GY. Prevalence, incidence, and lifetime risk of atrial fibrillation in China: new insights into the global burden of atrial fibrillation. *Chest*. 2015;147(1):109-119.
7. January CT, Wann LS, Alpert JS, et al. 2014 AHA/ACC/HRS guideline for the management of patients with atrial fibrillation: executive summary: a report of the American College of Cardiology/American Heart Association Task Force on practice guidelines and the Heart Rhythm Society. *Circulation*. 2014;130:2071- 2104.
8. Camm AJ, Kirchhof P, Lip GY, et al. Guidelines for the management of atrial fibrillation: the Task Force for the Management of Atrial Fibrillation of the European Society of Cardiology (ESC). *Europace*. 2010;12(10):1360-1420.
9. Kirchhof P, Benussi S, Kotecha D, et al. 2016 ESC Guidelines for the management of atrial fibrillation developed in collaboration with EACTS: The Task Force for the management of atrial fibrillation of the European Society of Cardiology (ESC) Developed with the special contribution of the European Heart Rhythm Association (EHRA) of the ESC Endorsed by the European Stroke Organization (ESO). *Eur*

- 1  
2  
3 *Heart J.* 2016; 37: 2893-2962
- 4  
5 10. Zhang H, Yang Y, Zhu J, et al. Baseline characteristics and management of patients  
6 with atrial fibrillation/flutter in the emergency department: results of a prospective,  
7 multicentre registry in China. *Intern Med J.* 2014;44:742-748.
- 8  
9  
10  
11 11. Zhang S. Atrial fibrillation in mainland China: epidemiology and current  
12 management. *Heart.* 2009;95:1052-1055.
- 13  
14  
15 12. Chang SS, Dong JZ, Ma CS, et al. Current Status and Time Trends of Oral  
16 Anticoagulation Use Among Chinese Patients With Nonvalvular Atrial Fibrillation:  
17 The Chinese Atrial Fibrillation Registry Study. *Stroke.* 2016; 47:1803-1810
- 18  
19  
20  
21 13. Xiong Q, Shantsila A, Lane DA, et al. Sex differences in clinical characteristics and  
22 inpatient outcomes among 2442 hospitalized Chinese patients with nonvalvular atrial  
23 fibrillation: The Nanchang Atrial Fibrillation Project. *Int J Cardiol.* 2015;201:195-  
24 199.
- 25  
26  
27  
28 14. Ellrodt AG, Fonarow GC, Schwamm LH, et al. Synthesizing lessons learned from get  
29 with the guidelines: the value of disease-based registries in improving quality and  
30 outcomes. *Circulation.* 2013;128:2447-2460.
- 31  
32  
33  
34 15. National Bureau of Statistics of China. China Statistical Year book 2013. *China*  
35 *Statistics Press. Beijing, China.* 2013.
- 36  
37  
38  
39 16. McNamara RL, Brass LM, Drozda Jr JP, et al. ACC/AHA key data elements and  
40 definitions for measuring the clinical management and outcomes of patients with  
41 atrial fibrillation: A report of the American College of Cardiology/American Heart  
42 Association Task Force on clinical data standards (writing committee to develop data  
43 standards on atrial fibrillation). *Journal of the American College of Cardiology.*  
44 2004;44:475-495.
- 45  
46  
47  
48  
49  
50 17. Buxton AE, Calkins H, Callans DJ, et al. ACC/AHA/HRS 2006 key data elements  
51 and definitions for electrophysiological studies and procedures: a report of the  
52 American College of Cardiology/American Heart Association Task Force on Clinical  
53 Data Standards (ACC/AHA/HRS Writing Committee to Develop Data Standards on  
54 Data Standards (ACC/AHA/HRS Writing Committee to Develop Data Standards on  
55  
56  
57  
58  
59  
60

- 1  
2  
3 Electrophysiology). *J Am Coll Cardiol*. 2006;48:2360-2396.
- 4  
5 18. Hao Y, Liu J, Liu J, et al. Rationale and Design of the Improving Care for  
6  
7 Cardiovascular Disease in China (CCC) Project: a National Effort to Prompt Quality  
8  
9 Enhancement for Acute Coronary Syndrome. *American Heart Journal*. 2016  
10  
11 ;179:107-15
- 12  
13 19. Spertus JA, Eagle KA, Krumholz HM, Mitchell KR, Normand SL. American College  
14  
15 of Cardiology and American Heart Association methodology for the selection and  
16  
17 creation of performance measures for quantifying the quality of cardiovascular care.  
18  
19 *Circulation*. 2005;111:1703-1712.
- 20  
21 20. Estes NA, 3rd, Halperin JL, Calkins H, et al. ACC/AHA/Physician Consortium 2008  
22  
23 clinical performance measures for adults with nonvalvular atrial fibrillation or atrial  
24  
25 flutter: a report of the American College of Cardiology/American Heart Association  
26  
27 Task Force on Performance Measures and the Physician Consortium for Performance  
28  
29 Improvement (Writing Committee to Develop Clinical Performance Measures for  
30  
31 Atrial Fibrillation): developed in collaboration with the Heart Rhythm Society.  
32  
33 *Circulation*. 2008;117(8):1101-1120.
- 34  
35 21. Bonow RO, Douglas PS, Buxton AE, et al. ACCF/AHA methodology for the  
36  
37 development of quality measures for cardiovascular technology: a report of the  
38  
39 American College of Cardiology Foundation/American Heart Association Task Force  
40  
41 on Performance Measures. *Circulation*. 2011;124:1483-1502.
- 42  
43 22. Huang C, Zhang S, Huang D, et al. Current knowledge and management  
44  
45 recommendations of atrial fibrillation: 2015. *Chinese Journal of Cardiac*  
46  
47 *Arrhythmias*. 2015(5):321-385.
- 48  
49 23. Eapen ZJ, Fonarow GC, Dai D, et al. Comparison of composite measure  
50  
51 methodologies for rewarding quality of care: an analysis from the American Heart  
52  
53 Association's Get With The Guidelines program. *Circ Cardiovasc Qual Outcomes*.  
54  
55 2011;4:610-618.
- 56  
57 24. Cabana MD, Rand CS, Powe NR, et al. Why don't physicians follow clinical practice

- 1  
2  
3 guidelines? A framework for improvement. *JAMA*. 1999;282:1458-1465.
- 4  
5 25. Berthiaume JT, Tyler PA, Ng-Osorio J, LaBresh KA. Aligning financial incentives  
6  
7 with "Get With The Guidelines" to improve cardiovascular care. *Am J Manag Care*.  
8  
9 2004;10:501-504.
- 10  
11 26. Lewis WR, Peterson ED, Cannon CP, et al. An organized approach to improvement  
12  
13 in guideline adherence for acute myocardial infarction: results with the Get With The  
14  
15 Guidelines quality improvement program. *Arch Intern Med*. 2008;168:1813-1819.
- 16  
17 27. Chinese Hospital Association. Manual of single disease quality management.  
18  
19 *Scientific and technical documentation press, Beijing, China*. 2008.
- 20  
21 28. Sun Y, Wang Y, Jiang J, Wang L, Hu D. Renal Dysfunction, CHADS2 Score, and  
22  
23 Adherence to the Anticoagulant Treatment in Nonvalvular Atrial Fibrillation: A  
24  
25 Cross-Sectional Study in Mainland China. *Clin Appl Thromb Hemost*. 2015.
- 26  
27 29. Sun Y, Hu D, Li K, Zhou Z. Predictors of stroke risk in native Chinese with  
28  
29 nonrheumatic atrial fibrillation: retrospective investigation of hospitalized patients.  
30  
31 *Clin Cardiol*. 2009;32:76-81.
- 32  
33 30. Lip GYH, Rushton-Smith SK, Goldhaber SZ, et al. Does Sex Affect Anticoagulant  
34  
35 Use for Stroke Prevention in Nonvalvular Atrial Fibrillation?: The Prospective Global  
36  
37 Anticoagulant Registry in the FIELD-Atrial Fibrillation. *Circulation: Cardiovascular*  
38  
39 *Quality and Outcomes*. 2015;8:S12-S20.
- 40  
41 31. Huisman MV, Rothman KJ, Paquette M, et al. Antithrombotic Treatment Patterns in  
42  
43 Patients with Newly Diagnosed Nonvalvular Atrial Fibrillation: The GLORIA-AF  
44  
45 Registry, Phase II. *Am J Med*. 2015;128:1306-1313 e1301.
- 46  
47 32. Lip GY, Laroche C, Ioachim PM, et al. Prognosis and treatment of atrial fibrillation  
48  
49 patients by European cardiologists: one year follow-up of the EURObservational  
50  
51 Research Programme-Atrial Fibrillation General Registry Pilot Phase (EORP-AF  
52  
53 Pilot registry). *Eur Heart J*. 2014;35:3365-3376.
- 54  
55 33. Lewis WR, Piccini JP, Turakhia MP, et al. Get With The Guidelines AFIB: novel  
56  
57 quality improvement registry for hospitalized patients with atrial fibrillation. *Circ*

- 1  
2  
3 *Cardiovasc Qual Outcomes*. 2014;7:770-777.
- 4  
5 34. Kakkak AK, Mueller I, Bassand JP, et al. International longitudinal registry of  
6 patients with atrial fibrillation at risk of stroke: Global Anticoagulant Registry in the  
7 FIELD (GARFIELD). *Am Heart J*. 2012;163:13-19 e11.
- 8  
9  
10 35. Piccini JP, Fraulo ES, Ansell JE, et al. Outcomes registry for better informed  
11 treatment of atrial fibrillation: Rationale and design of ORBIT-AF. *American Heart*  
12 *Journal*. 2011;162:606-612.e601.
- 13  
14  
15 36. Lamberts M, Gislason GH, Olesen JB, et al. Oral anticoagulation and antiplatelets in  
16 atrial fibrillation patients after myocardial infarction and coronary intervention. *J Am*  
17 *Coll Cardiol*. 2013;62:981-989.
- 18  
19  
20 37. Piccini JP, Hernandez AF, Zhao X, et al. Quality of care for atrial fibrillation among  
21 patients hospitalized for heart failure. *J Am Coll Cardiol*. 2009;54:1280-1289.
- 22  
23  
24 38. Steinberg BA, Kim S, Piccini JP, et al. Use and associated risks of concomitant  
25 aspirin therapy with oral anticoagulation in patients with atrial fibrillation: insights  
26 from the Outcomes Registry for Better Informed Treatment of Atrial Fibrillation  
27 (ORBIT-AF) Registry. *Circulation*. 2013;128:721-728.
- 28  
29  
30 39. Wieloch M, Sjalander A, Frykman V, Rosenqvist M, Eriksson N, Svensson PJ.  
31 Anticoagulation control in Sweden: reports of time in therapeutic range, major  
32 bleeding, and thrombo-embolic complications from the national quality registry. *Eur*  
33 *Heart J*. 2011;32:2282-2289.
- 34  
35  
36 40. Vinereanu D, Lopes RD, Bahit MC, et al. A multifaceted intervention to improve  
37 treatment with oral anticoagulants in atrial fibrillation (IMPACT-AF): an  
38 international, cluster-randomised trial. *Lancet*. 2017;390:1737-1746.
- 39  
40  
41  
42  
43  
44  
45  
46  
47  
48  
49  
50  
51  
52  
53  
54  
55  
56  
57  
58  
59  
60

**Authors' contributions:**

The manuscript was prepared on behalf of the CCC-AF Investigators. SS, Y Huo, GF, JG, KT, CM and DZ conceived the study idea. Jing L, Jun L, LM, YG and MZ made substantial contributions to the development of the study protocol. Y Hao drafted the manuscript and all authors contributed to critical revisions of the paper. This final manuscript was read and approved by all authors.

**Funding**

The CCC project is a collaborative program of the AHA and the CSC. The AHA was funded by Pfizer for the quality improvement initiative through an independent grant for learning and change. Pfizer provided no oversight on the goals, execution, or publication of the program. The authors are solely responsible for the design and conduct of this study, all study analyses, the drafting and editing of the manuscript, and its final contents.

**Disclosures**

The authors declare that they have no competing interests.

## Figure Legends

Figure 1. Distribution of hospitals for the CCC-AF program.

Numerals on the map indicate the number of hospitals in the area. From Hao Y, Liu J, Liu J, et al: Rationale and Design of the Improving Care for Cardiovascular Disease in China (CCC) Project: a National Effort to Prompt Quality Enhancement for Acute Coronary Syndrome. *American Heart Journal*. 2016 ;179:107-15.

Figure 2. Distribution of CCC-AF composite scores of primary performance measures across hospitals from February 2015 to March 2017.

The composite scores were calculated based on the 6 primary performance measures, using the sum of total instances when a required measure was performed (correct care provided) divided by the total number of eligible opportunities.

Figure 3. Distribution of CCC-AF composite scores of secondary performance measures across hospitals from February 2015 to March 2017.

The composite scores were calculated based on 8 secondary performance measures, using the sum of total instances when a required measure was performed (correct care provided) divided by the total number of eligible opportunities.

Table 1. Primary Performance Measures for the CCC-AF Project

| Reference | Title of Performance Measure                                                                         | Proportion,%<br>(Numerator/ denominator) |
|-----------|------------------------------------------------------------------------------------------------------|------------------------------------------|
| 7, 22     | Proportion of patients with nonvalvular AF in whom assessment of thromboembolic risk                 | 23.6 (5384/22864)                        |
| 7, 22     | <sup>a</sup> Proportion of AF patients with indication prescribed an anticoagulant drug at discharge | 42.3 (6413/15150)                        |
| 7, 22     | Proportion of patients discharged on warfarin who have PT/INR follow-up planned at discharge         | 87.2 (7721/8857)                         |
| 7, 22     | <sup>b</sup> Proportion of AF patients with indications receiving ACEI/ARB at discharge              | 53.1 (1794/3382)                         |
| 7, 22     | <sup>c</sup> Proportion of AF patients with indication prescribed a beta blocker at discharge        | 57.0 (1245/2184)                         |
| 7         | <sup>d</sup> Proportion of AF patients with indication prescribed a statin at discharge              | 61.2 (8524/13925)                        |
| --        | Composite scores of primary performance measures                                                     | 46.8 (31081/66362)                       |

AF, atrial fibrillation; PT, prothrombin time; INR, international normalized ratio; ACEI, angiotensin-converting enzyme inhibitor; ARB, angiotensin receptor blocker.

<sup>a</sup> indications refer to nonvalvular AF patients with CHA<sub>2</sub>DS<sub>2</sub>-VASc<sub>≥</sub>2.



1  
2  
3  
4  
5  
6 <sup>b</sup> indications refer to AF patients with acute myocardial infarction; or coronary heart disease with comorbidity of hypertension, diabetes mellitus  
7  
8 or chronic kidney disease; or left ventricular ejection fraction <40% according to the case records.  
9

10  
11 <sup>c</sup> indications refer to AF patients with heart failure.  
12

13  
14 <sup>d</sup> indications refer to AF patients with coronary heart disease, ischemic stroke/transient ischemic attack, peripheral vascular disease or diabetes  
15  
16 mellitus.  
17  
18  
19  
20  
21  
22  
23  
24  
25  
26  
27  
28  
29  
30  
31  
32  
33  
34  
35  
36  
37  
38  
39  
40  
41  
42  
43  
44  
45  
46  
47

Table 2. Secondary Performance Measures for the CCC-AF Project

| Reference | Title of Performance Measure                                                                          | Proportion,%<br>(Numerator/ denominator) |
|-----------|-------------------------------------------------------------------------------------------------------|------------------------------------------|
| 22        | Proportion of nonvalvular AF patients who had a CHADS <sub>2</sub> score reported                     | 15.0 (3422/22864)                        |
| 7, 22     | Proportion of nonvalvular AF patients who had a CHA <sub>2</sub> DS <sub>2</sub> -VASc score reported | 19.2 (4397/22864)                        |
| 7, 22     | Proportion of AF patients who have a documented resting heart rate of <80 bpm closest to discharge    | 65.0 (7140/10989)                        |
| 7, 22     | Proportion of AF patients that receiving anticoagulation therapy education                            | 89.4 (10941/12243)                       |
| 7, 22     | Proportion of AF patients that receiving conventional medical education                               | 88.3 (25547/28615)                       |
| 20        | <sup>a</sup> Proportion of AF patients with indication prescribed aldosterone antagonist at discharge | 72.2 (888/1230)                          |
| 7, 22     | Proportion valvular AF patients prescribed warfarin at discharge                                      | 52.4 (2010/3838)                         |
| 20        | Proportion of AF patients who are given smoking cessation advice or counseling                        | 22.5 (1263/5623)                         |
|           | Composite scores of secondary performance measures                                                    | 51.4 (55608/108266)                      |

AF, atrial fibrillation.

<sup>a</sup> indications refer to acute myocardial infarction patients with left ventricular ejection fraction (LVEF)<40% or heart failure or diabetes mellitus; or the heart failure patients with LVEF<35%.

Table 3. Characteristics of Enrolled Patients with AF enrolled from February 2015 to March 2017

|                                    | <b>Men</b>     | <b>Women</b>   | <b>Overall</b> |
|------------------------------------|----------------|----------------|----------------|
|                                    | <b>n=15738</b> | <b>n=13063</b> | <b>n=28801</b> |
| <b>Age</b>                         |                |                |                |
| mean (SD), y                       | 67.0(12.7)     | 70.6(11.2)     | 68.6 (12.1)    |
| <b>Age group, n (%)</b>            |                |                |                |
| <65 y                              | 6528(41.5)     | 3823(29.3)     | 10351(35.9)    |
| 65-74 y                            | 4512(28.7)     | 4079(31.2)     | 8591(29.8)     |
| ≥75 y                              | 4698(29.9)     | 5161(39.5)     | 9859(34.2)     |
| <b>Healthcare insurance, n (%)</b> |                |                |                |
| Urban employees-basic insurance    | 6823(43.4)     | 5045(38.6)     | 11868(41.2)    |
| Urban residents-basic insurance    | 2817(17.9)     | 2782(21.3)     | 5599(19.4)     |
| New rural cooperative insurance    | 2696(17.1)     | 2830(21.7)     | 5526(19.2)     |
| Self-paying                        | 1654(10.5)     | 1186(9.1)      | 2840(9.9)      |
| Others                             | 1748(11.1)     | 1220(9.3)      | 2968(10.3)     |
| <b>Medical history, n (%)</b>      |                |                |                |
| Hypertension                       | 9973(63.4)     | 8874(67.9)     | 18847(65.4)    |
| CAD                                | 5050(32.1)     | 3991(30.6)     | 9041(31.4)     |
| Heart failure                      | 2994(19.0)     | 2788(21.3)     | 5782(20.1)     |
| Diabetes mellitus                  | 2694(17.1)     | 2473(18.9)     | 5167(17.9)     |
| Stroke/TIA                         | 2187(13.9)     | 1843(14.1)     | 4030(14)       |
| PAD                                | 1647(10.5)     | 915(7.0)       | 2562(8.9)      |
| Myocardial infarction              | 1191(7.6)      | 551(4.2)       | 1742(6.0)      |

|                   |            |            |             |
|-------------------|------------|------------|-------------|
| Previous bleeding | 96(0.6)    | 74(0.6)    | 170(0.6)    |
| Current smoker    | 5241(33.3) | 413(3.2)   | 5654(19.6)  |
| AF type           |            |            |             |
| Newly diagnosed   | 1742(11.1) | 1330(10.2) | 3072(10.7)  |
| Paroxysmal        | 6143(39.0) | 5053(38.7) | 11196(38.9) |
| Persistent        | 4256(27.0) | 3405(26.1) | 7661(26.6)  |
| Permanent         | 2447(15.5) | 2327(17.8) | 4774(16.6)  |
| Unknown           | 1150(7.3)  | 948(7.3)   | 2098(7.3)   |

AF, atrial fibrillation; SD, standard deviation; CVD, cardiovascular disease; CAD, coronary artery disease; PCI, percutaneous coronary intervention; TIA, transient ischemic attack; PAD, peripheral artery disease.

Table 4. Characteristics of AF Registries Involving Sites in China

| Studies                           | Countries  | Sites | Population           | Sample size | QI measure | Follow up  | Study period  |
|-----------------------------------|------------|-------|----------------------|-------------|------------|------------|---------------|
| Sun Y et al. 2015 <sup>28</sup>   | China only | 50    | Outpatient           | 3017        | No         | No         | 2012          |
| CAFR <sup>12</sup>                | China only | 32    | Outpatient/inpatient | 11496       | No         | Up to 2020 | 2011- present |
| GLORIA-AF II <sup>31</sup>        | 42         | 736   | Outpatient           | 10871       | No         | 2 year     | 2011- present |
| Nanchang AF Project <sup>13</sup> | China only | 1     | Inpatient            | 2442        | No         | No         | 2011-2013     |
| GARFIELD-AF <sup>30</sup>         | 30         | 858   | Outpatient/inpatient | 17184       | No         | 1 year     | 2010-2013     |
| Chinese AF registry <sup>10</sup> | China only | 20    | Emergency department | 2016        | No         | 1 year     | 2008-2011     |
| Sun et al. <sup>29</sup>          | China only | 18    | Inpatient            | 3425        | No         | No         | 2000-2004     |

CAFR, Chinese Atrial Fibrillation Registry Study; GLORIA-AF, Global Registry on Long-term Oral Antithrombotic Treatment in Patients with Atrial Fibrillation; GARFIELD-AF, Global Anticoagulant Registry in the FIELD-Atrial Fibrillation; QI, quality improvement.

1  
2  
3  
4  
5  
6  
7  
8  
9  
10  
11  
12  
13  
14  
15  
16  
17  
18  
19  
20  
21  
22  
23  
24  
25  
26  
27  
28  
29  
30  
31  
32  
33  
34  
35  
36  
37  
38  
39  
40  
41  
42  
43  
44  
45  
46  
47  
48  
49  
50  
51  
52  
53  
54  
55  
56  
57  
58  
59  
60

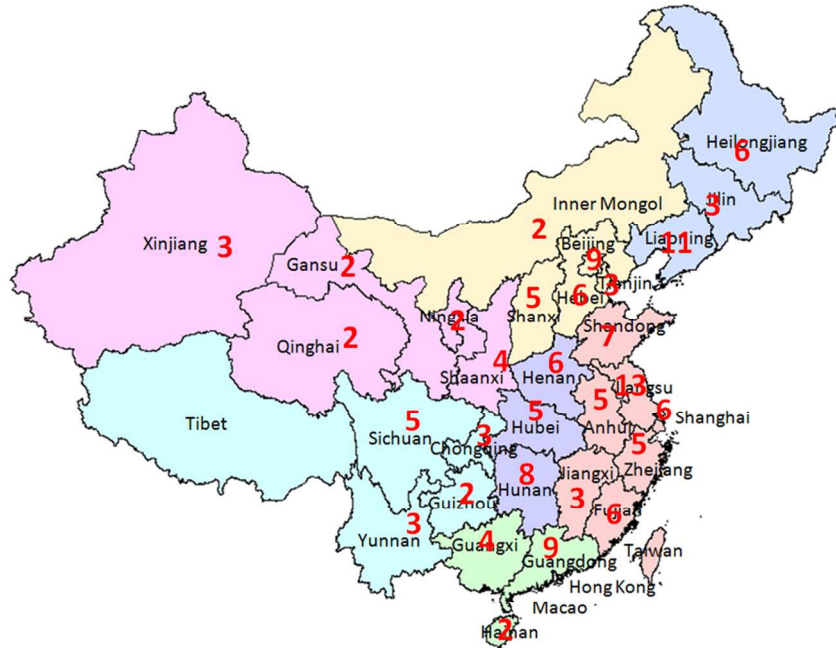

Figure 1. Distribution of hospitals for the CCC-AF program. Numerals on the map indicate the number of hospitals in the area. Adapted from reference 18.

102x76mm (300 x 300 DPI)

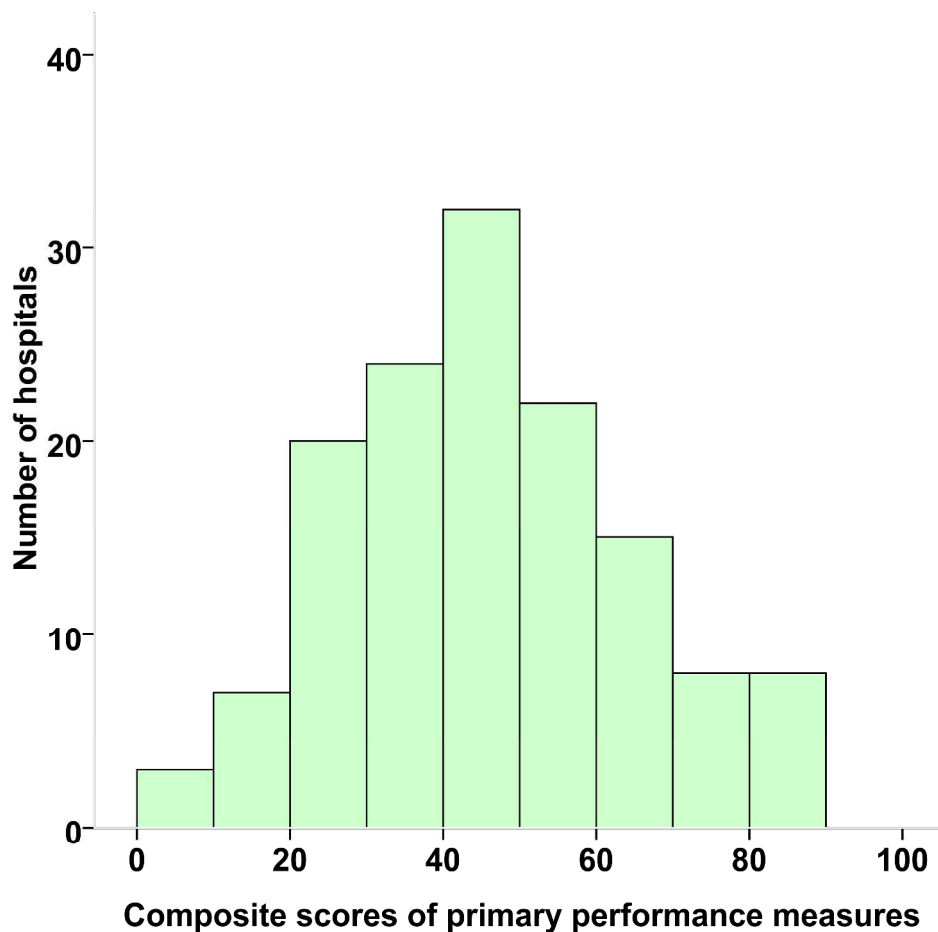

Figure 2. Distribution of CCC-AF composite scores of primary performance measures across hospitals from February 2015 to March 2017.

The composite scores were calculated based on the 6 primary performance measures, using the sum of total instances when a required measure was performed (correct care provided) divided by the total number of eligible opportunities.

554x521mm (300 x 300 DPI)

1  
2  
3  
4  
5  
6  
7  
8  
9  
10  
11  
12  
13  
14  
15  
16  
17  
18  
19  
20  
21  
22  
23  
24  
25  
26  
27  
28  
29  
30  
31  
32  
33  
34  
35  
36  
37  
38  
39  
40  
41  
42  
43  
44  
45  
46  
47  
48  
49  
50  
51  
52  
53  
54  
55  
56  
57  
58  
59  
60

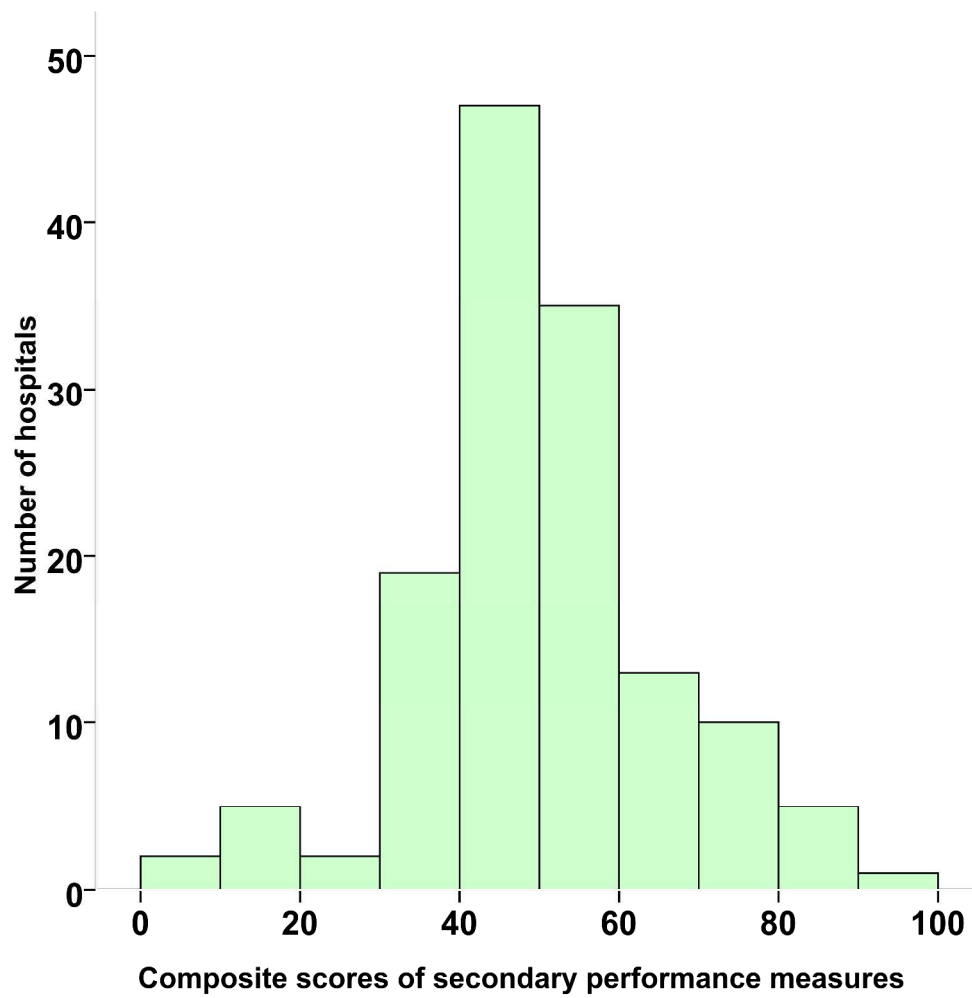

Figure 3. Distribution of CCC-AF composite scores of secondary performance measures across hospitals from February 2015 to March 2017.

The composite scores were calculated based on 8 secondary performance measures, using the sum of total instances when a required measure was performed (correct care provided) divided by the total number of eligible opportunities.

536x543mm (300 x 300 DPI)



## **SUPPLEMENTAL MATERIAL**

### **Contents**

#### **Supplemental Tables**

|                                                             |           |
|-------------------------------------------------------------|-----------|
| Table S1. Hospital Sampling Frame of CCC-AF.....            | <b>2</b>  |
| Table S2. List of Hospitals for Phase One .....             | <b>3</b>  |
| Table S3. List of Hospitals for Phase Two .....             | <b>7</b>  |
| Table S4. Case Report Form of CCC-AF .....                  | <b>11</b> |
| Table S5. Definition of Primary Performance Measures.....   | <b>18</b> |
| Table S6. Definition of Secondary Performance Measures..... | <b>29</b> |

#### **Supplemental Figures**

|                                                                                |           |
|--------------------------------------------------------------------------------|-----------|
| Figure S1. Organizational Framework and Governance of the CCC-AF Program ..... | <b>40</b> |
|--------------------------------------------------------------------------------|-----------|

Table S1. Hospital Sampling Frame of CCC-AF

| Territories <sup>&amp;</sup> | GDP per capital <sup>*</sup> | Provinces                        | No. of hospitals in the area <sup>#</sup> | No. of hospitals needed (10%) | Enrolled hospitals in Phase 1 | Enrolled hospitals in Phase 2 |
|------------------------------|------------------------------|----------------------------------|-------------------------------------------|-------------------------------|-------------------------------|-------------------------------|
| Northern China               | Low                          | NA                               | --                                        | --                            | --                            | --                            |
|                              | Medium-low                   | Shanxi                           | 49                                        | 5                             | 4                             | 1                             |
|                              | Medium-high                  | Hebei                            | 55                                        | 5                             | 4                             | 2                             |
|                              | High                         | Beijing, Tianjin, Inner Mongolia | 123                                       | 12                            | 13                            | 1                             |
| Northeast China              | Low                          | NA                               | --                                        | --                            | --                            | --                            |
|                              | Medium-low                   | Heilongjiang                     | 77                                        | 7                             | 1                             | 5                             |
|                              | Medium-high                  | Jilin                            | 39                                        | 4                             | 2                             | 1                             |
|                              | High                         | Liaoning                         | 101                                       | 10                            | 2                             | 9                             |
| Eastern China                | Low                          | Anhui, Jiangxi                   | 84                                        | 8                             | 3                             | 5                             |
|                              | Medium-low                   | NA                               | --                                        | --                            | --                            | --                            |
|                              | Medium-high                  | Fujian, Shandong                 | 129                                       | 12                            | 1                             | 12                            |
|                              | High                         | Shanghai, Jiangsu, Zhejiang      | 240                                       | 23                            | 13                            | 11                            |
| Central China                | Low                          | NA                               | --                                        | --                            | --                            | --                            |
|                              | Medium-low                   | Henan, Hunan                     | 134                                       | 13                            | 7                             | 7                             |
|                              | Medium-high                  | Hubei                            | 60                                        | 6                             | 0                             | 5                             |
|                              | High                         | NA                               | --                                        | --                            | --                            | --                            |
| Southern China               | Low                          | Guangxi                          | 50                                        | 5                             | 2                             | 2                             |
|                              | Medium-low                   | Hainan                           | 11                                        | 1                             | 2                             | 0                             |
|                              | Medium-high                  | NA                               | --                                        | --                            | --                            | --                            |
|                              | High                         | Guangdong                        | 105                                       | 10                            | 5                             | 4                             |
| Southwest China              | Low                          | Guizhou, Yunnan, Tibet           | 82                                        | 8                             | 3                             | 2                             |
|                              | Medium-low                   | Sichuan                          | 83                                        | 8                             | 0                             | 5                             |
|                              | Medium-high                  | Chongqing                        | 22                                        | 2                             | 3                             | 0                             |
|                              | High                         | NA                               | --                                        | --                            | --                            | --                            |
| Western China                | Low                          | Gansu                            | 34                                        | 3                             | 2                             | 0                             |
|                              | Medium-low                   | Qinghai, Xinjiang                | 29                                        | 3                             | 5                             | 0                             |
|                              | Medium-high                  | Shaanxi, Ningxia                 | 51                                        | 5                             | 3                             | 3                             |
|                              | High                         | NA                               | --                                        | --                            | --                            | --                            |
| <b>Total</b>                 |                              |                                  | <b>1558</b>                               | <b>150</b>                    | <b>75</b>                     | <b>75</b>                     |

<sup>&</sup>Mainland China includes seven geographical regions: Northern, Northeast, Eastern, Central, Southern, Southwest, and Western China. <sup>\*</sup>GDP per capital is from National Bureau of Statistical, provinces are grouped into quadruplets according to GDP per capital, low:<29608.00 RMB, medium-low: 29608.00-36393.00 RMB, medium-high: 36394.00-54095.00 RMB, high: >54095.00 RMB.

<sup>#</sup>Numbers of hospitals are from China Statistical Yearbook 2013.

**Table S2. List of Hospitals for Phase One**

| Hospitals                                                                                 | Territories     | Provinces    | City      | Investigator          |
|-------------------------------------------------------------------------------------------|-----------------|--------------|-----------|-----------------------|
| Shanxi Cardiovascular Hospital                                                            | Northern China  | Shanxi       | Taiyuan   | Bao Li                |
| Nanjing Drum Tower Hospital, The Affiliated Hospital of Nanjing University Medical School | Eastern China   | Jiangsu      | Nanjing   | Biao Xu, Guangshu Han |
| Hainan General Hospital                                                                   | Southern China  | Hainan       | Haikou    | Bin Li                |
| The Second Hospital of Jilin University                                                   | Northeast China | Jilin        | Changchun | Bin Liu               |
| The 2nd Affiliated Hospital of Harbin Medical University                                  | Northeast China | Heilongjiang | Harbin    | Bo Yu                 |
| The Ninth Hospital Affiliated to Shanghai Jiaotong University School of Medicine          | Eastern China   | Shanghai     | Shanghai  | Changqian Wang        |
| Henan Provincial People's Hospital                                                        | Central China   | Henan        | Zhengzhou | ChuanYu Gao           |
| Shanxi Provincial People's Hospital                                                       | Northern China  | Shanxi       | Taiyuan   | Chunlin Lai           |
| Xinqiao Hospital, Third Military Medical University                                       | Southwest China | Chongqing    | Chongqing | Cui Bin, Lan Huang    |
| China Meitan General Hospital                                                             | Northern China  | Beijing      | Beijing   | Di Wu                 |
| The 309th Hospital of Chinese People's Liberation Army                                    | Northern China  | Beijing      | Beijing   | Fakuan Tang, Jun Xiao |
| Zhongda Hospital, Southeast University                                                    | Eastern China   | Jiangsu      | Nanjing   | Genshan Ma            |
| The First Affiliated Hospital of Liaoning Medical University                              | Northeast China | Liaoning     | Jinzhou   | Guizhou Tao           |
| Xinjiang Uygur Autonomous Region People's Hospital                                        | Northwest China | Xinjiang     | Urumchi   | Guoqing Li            |
| Sir Run Run Shaw Hospital, College of Medicine, Zhejiang University                       | Eastern China   | Zhejiang     | Hangzhou  | Guosheng Fu           |
| Beijing Friendship Hospital, Capital Medical University                                   | Northern China  | Beijing      | Beijing   | Hongwei Li            |
| The First Affiliated Hospital of Bengbu Medical College                                   | Eastern China   | Anhui        | Bengbu    | Honhju Wang           |
| General Hospital of TISCO                                                                 | Northern China  | Shanxi       | Taiyuan   | Huifeng Wang          |

| Hospitals                                                                      | Territories     | Provinces | City      | Investigator   |
|--------------------------------------------------------------------------------|-----------------|-----------|-----------|----------------|
| Dongguan People's Hospital                                                     | Southern China  | Guangdong | Dongguan  | Jianfeng Ye    |
| Panyu Hospital of Chinese Medicine                                             | Southern China  | Guangdong | Guangzhou | Jianhao Li     |
| Peking University First Hospital                                               | Northern China  | Beijing   | Beijing   | Jie Jiang      |
| Sun Yat-sen Memorial Hospital, Sun Yat-sen University                          | Southern China  | Guangdong | Guangzhou | Jingfeng Wang  |
| Guangdong General Hospital                                                     | Southern China  | Guangdong | Guangzhou | Jiyan Chen     |
| Hospital of Xinjiang Production & Construction Corps                           | Northwest China | Xinjiang  | Urumchi   | Junming Liu    |
| The Military General Hospital of Beijing PLA                                   | Northern China  | Beijing   | Beijing   | Junxia Li      |
| The First Affiliated Hospital of Guangxi Medical University                    | Southern China  | Guangxi   | Nanning   | Lang Li        |
| Tongren Hospital Affiliated to Shanghai Jiaotong University School of Medicine | Eastern China   | Shanghai  | Shanghai  | Li Jiang       |
| Binzhou City Center Hospital                                                   | Eastern China   | Shandong  | Binzhou   | Lijun Meng     |
| The First Affiliated Hospital of Zhengzhou University                          | Central China   | Henan     | Zhengzhou | Ling Li        |
| Xijing Hospital                                                                | Northwest China | Shaanxi   | Xi'an     | Ling Tao       |
| The Affiliated Hospital of Guizhou Medical University                          | Southwest China | Guizhou   | Guiyang   | Lirong Wu      |
| First Affiliated Hospital of the People's Liberation Army General Hospital     | Northern China  | Beijing   | Beijing   | Miao Tian      |
| The Second People's Hospital of Yunnan Province                                | Southwest China | Yunnan    | Kunming   | Minghua Han    |
| Haikou People's Hospital                                                       | Southern China  | Hainan    | Haikou    | Moshui Chen    |
| Gansu Provincial Hospital                                                      | Northwest China | Gansu     | Lanzhou   | Ping Xie       |
| The First Affiliated Hospital of Henan University of Science and Technology    | Central China   | Henan     | Luoyang   | Pingshuan Dong |
| Chenzhou First People's Hospital                                               | Central China   | Hunan     | Chenzhou  | Qiaoqing Zhong |
| People's Hospital of Qinghai Province                                          | Northwest China | Qinghai   | Xining    | Rong Chang     |

| Hospitals                                                     | Territories     | Provinces      | City         | Investigator              |
|---------------------------------------------------------------|-----------------|----------------|--------------|---------------------------|
| Affiliated Hospital of Ningxia Medical University             | Northwest China | Ningxia        | Yinchuan     | Shaobin Jia               |
| Beijing Anzhen Hospital, Capital Medical University           | Northern China  | Beijing        | Beijing      | Shaoping Nie, Xiaohui Liu |
| North Jiangsu People's Hospital                               | Eastern China   | Jiangsu        | Yangzhou     | Shenghu He                |
| Shanghai Sixth People's Hospital                              | Eastern China   | Shanghai       | Shanghai     | Shixin Ma                 |
| The First Hospital of Handan                                  | Northern China  | Hebei          | Handan       | Shuanli Xin               |
| Huai'an First People's Hospital                               | Eastern China   | Jiangsu        | Huai'an      | Shuren Ma                 |
| The First Affiliated Hospital of Chongqing Medical University | Southwest China | Chongqing      | Chongqing    | Suxin Luo                 |
| Navy General Hospital                                         | Northern China  | Beijing        | Beijing      | Tianchang Li              |
| Zhejiang Provincial Hospital of TCM                           | Eastern China   | Zhejiang       | Hangzhou     | Wei Mao                   |
| The Third Xiangya Hospital of Central South University        | Central China   | Hunan          | Changsha     | Weihong Jiang             |
| Affiliated Hospital of Qinghai University                     | Northwest China | Qinghai        | Xining       | Weijun Liu                |
| Teda International Cardiovascular Hospital                    | Northern China  | Tianjin        | Tianjin      | Wenhua Lin                |
| The Second Hospital of Hebei Medical University               | Northern China  | Hebei          | Shijiazhuang | Xianghua Fu               |
| Changhai Hospital of Shanghai                                 | Eastern China   | Shanghai       | Shanghai     | Xianxian Zhao             |
| The Second Affiliated Hospital to Nanchang University         | Eastern China   | Jiangxi        | Nanchang     | Xiaoshu Cheng             |
| Hebei General Hospital                                        | Northern China  | Hebei          | Shijiazhuang | Xiaoyong Qi               |
| Inner Mongolia People's Hospital                              | Northern China  | Inner Mongolia | Hohhot       | Xingsheng Zhao            |
| The General Hospital of Shenyang Military Region              | Northeast China | Liaoning       | Shenyang     | Yaling Han                |
| The First Hospital of Jilin University                        | Northeast China | Jilin          | Changchun    | Yang Zheng                |
| Tianjin Chest Hospital                                        | Northern China  | Tianjin        | Tianjin      | Yin Liu                   |
| Hunan Provincial People's Hospital                            | Central China   | Hunan          | Changsha     | Ying Guo                  |

| Hospitals                                                  | Territories     | Provinces      | City         | Investigator  |
|------------------------------------------------------------|-----------------|----------------|--------------|---------------|
| People's Hospital of Yuxi City                             | Southwest China | Yunnan         | Yuxi         | Yinglu Hao    |
| The People's Hospital of Guangxi Zhuang Autonomous Region  | Southern China  | Guangxi        | Nanning      | Yingzhong Lin |
| The First Teaching Hospital of Xinjiang Medical University | Northwest China | Xinjiang       | Urumchi      | Yitong Ma     |
| Baogang Hospital                                           | Northern China  | Inner Mongolia | Baotou       | Yongdong Li   |
| Tianjin Medical University General Hospital                | Northern China  | Tianjin        | Tianjin      | Yuemin Sun    |
| The Second Affiliated Hospital of Zhengzhou University     | Central China   | Henan          | Zhengzhou    | Yulan Zhao    |
| Nanfang Hospital of Southern Medical University            | Southern China  | Guangdong      | Guangzhou    | Yuqing Hou    |
| The First Affiliated Hospital to Nanchang University       | Eastern China   | Jiangxi        | Nanchang     | Zeqi Zheng    |
| The First Affiliated Hospital of Lanzhou University        | Northwest China | Gansu          | Lanzhou      | Zheng Zhang   |
| The Third Hospital of Shijiazhuang                         | Northern China  | Hebei          | Shijiazhuang | Zhenguo Ji    |
| Wuxi People's Hospital                                     | Eastern China   | Jiangsu        | Wuxi         | Zhenyu Yang   |
| Jiangsu Province Hospital                                  | Eastern China   | Jiangsu        | Nanjing      | Zhijian Yang  |
| The Second Hospital of Shanxi Medical University           | Northern China  | Shanxi         | Taiyuan      | Zhiming Yang  |
| The Affiliated Hospital of Xuzhou Medical College          | Eastern China   | Jiangsu        | Xuzhou       | Zhirong Wang  |
| Southwest Hospital, Third Military Medical University      | Southwest China | Chongqing      | Chongqing    | Zhiyuan Song  |
| The First Affiliated Hospital of Xi'an Jiaotong University | Northwest China | Shaanxi        | Xi'an        | Zuyi Yuan     |

**Table S3. List of Hospitals for Phase Two**

| Hospitals                                                        | Territories     | Provinces    | City       | Investigator   |
|------------------------------------------------------------------|-----------------|--------------|------------|----------------|
| Yangzhou First People's Hospital                                 | Eastern China   | Jiangsu      | Yangzhou   | Aihua Li       |
| Hospital 463 of Chinese People's Liberation Army                 | Northeast China | Liaoning     | Shenyang   | Bosong Yang    |
| The Central Hospital of Mianyang                                 | Northwest China | Sichuan      | Mianyang   | Caidong Luo    |
| Liaocheng People's Hospital                                      | Eastern China   | Shandong     | Liaocheng  | Chunyan Zhang  |
| Yancheng Third People's Hospital                                 | Eastern China   | Jiangsu      | Yancheng   | Chunyang Wu    |
| The Second Xiangya Hospital of Central South University          | Central China   | Hunan        | Changsha   | Daoquan Peng   |
| The Central Hospital of Panzhihua                                | Northwest China | Sichuan      | Panzhihua  | Dawen Xu       |
| The First Hospital of Qiqihaer City                              | Northeast China | Heilongjiang | Qiqihaer   | Gang Xu        |
| The Third the People's Hospital of Bengbu                        | Eastern China   | Anhui        | Bengbu     | Gengsheng Sang |
| The First Hospital of Jiamusi                                    | Northeast China | Heilongjiang | Jiamusi    | Guixia Zhang   |
| Zhoushan People's Hospital                                       | Eastern China   | Zhejiang     | Zhoushan   | Guoxiong Chen  |
| Dalian Municipal Central Hospital                                | Northeast China | Liaoning     | Dalian     | Hailong Lin    |
| Renmin Hospital of Wuhan University                              | Central China   | Hubei        | Wuhan      | Hong Jiang     |
| Ningxia People's Hospital                                        | Northwest China | Ningxia      | Yinchuan   | Hong Luan      |
| The First People's Hospital of Yunnan Province (Kunhua Hospital) | Northwest China | Yunnan       | Kunming    | Hong Zhang     |
| The Central Hospital of Zhoukou                                  | Central China   | Henan        | Zhoukou    | Hualing Liu    |
| Anyang District Hospital                                         | Central China   | Henan        | Anyang     | Hui Liu        |
| Sichuan Provincial People's Hospital                             | Northwest China | Sichuan      | Chengdu    | Jianhong Tao   |
| Mudanjiang Cardiovascular Disease Hospital                       | Northeast China | Heilongjiang | Mudanjiang | Jianwen Liu    |
| Yichang Central Hospital                                         | Central China   | Hubei        | Yichang    | Jiawang Ding   |
| Qilu Hospital of Shandong                                        | Eastern China   | Shandong     | Jinan      | Jifu Li        |

| Hospitals                                                                            | Territories     | Provinces    | City      | Investigator            |
|--------------------------------------------------------------------------------------|-----------------|--------------|-----------|-------------------------|
| University                                                                           |                 |              |           |                         |
| Affiliated Hospital of Jiangsu University                                            | Eastern China   | Jiangsu      | Zhenjiang | Jinchuan Yan            |
| The First People's Hospital of Nanning City                                          | Southern China  | Guangxi      | Nanning   | Jinru Wei               |
| The First Affiliated Hospital of Fujian Medical University                           | Eastern China   | Fujian       | Fuzhou    | Jinzi Su                |
| Chengdu Third People's Hospital                                                      | Northwest China | Sichuan      | Chengdu   | Jiong Tang              |
| Yantai hospital                                                                      | Eastern China   | Shandong     | Yantai    | Juexin Fan              |
| Qingdao Municipal Hospital                                                           | Eastern China   | Shandong     | Qingdao   | Jun Guan                |
| Zhongshan Hospital Affiliated to Fudan University                                    | Eastern China   | Shanghai     | Shanghai  | Junbo Ge                |
| Longyan First Hospital                                                               | Eastern China   | Fujian       | Longyan   | Kaihong Chen            |
| Affiliated Hospital of Guangdong Medical College                                     | Southern China  | Guangdong    | Guangzhou | Keng Wu                 |
| Jiangxi Provincial People's Hospital                                                 | Eastern China   | Jiangxi      | Nanchang  | Lang Ji                 |
| Anhui Provincial Hospital                                                            | Eastern China   | Anhui        | Hefei     | Likun Ma                |
| Xiangtan City Central Hospital                                                       | Central China   | Hunan        | Xiangtan  | Lilong Tang             |
| The First Hospital of Haerbin City                                                   | Northeast China | Heilongjiang | Harbin    | Lin Wei                 |
| Central Hospital Affiliated to Shenyang Medical College                              | Northeast China | Liaoning     | Shenyang  | Man Zhang, Kaiming Chen |
| The Central Hospital of Wuhan                                                        | Central China   | Hubei        | Wuhan     | Manhua Chen             |
| Hangzhou First People's Hospital                                                     | Eastern China   | Zhejiang     | Hangzhou  | Ningfu Wang             |
| The Central Hospital of Xuzhou                                                       | Eastern China   | Jiangsu      | Xuzhou    | Peiying Zhang           |
| The Second hospital of Dalian Medical University                                     | Northeast China | Liaoning     | Dalian    | Peng Qu                 |
| The First Affiliated Hospital of Liaoning University of Traditional Chinese Medicine | Northeast China | Liaoning     | Shenyang  | Ping Hou                |
| Beijing Tsinghua Changgung Hospital                                                  | Northern China  | Beijing      | Beijing   | Ping Zhang              |
| Guizhou Provincial People's Hospital                                                 | Northwest China | Guizhou      | Guiyang   | Qiang Wu                |



| Hospitals                                                   | Territories     | Provinces | City      | Investigator   |
|-------------------------------------------------------------|-----------------|-----------|-----------|----------------|
| The First Affiliated Hospital of Xiamen University          | Eastern China   | Fujian    | Xiamen    | Qiang Xie      |
| Quanzhou First Hospital                                     | Eastern China   | Fujian    | Quanzhou  | Rong Lin       |
| Wuzhou People's Hospital                                    | Southern China  | Guangxi   | Wuzhou    | Shaowu Ye      |
| The Central Hospital of Jilin                               | Northeast China | Jilin     | Changchun | Shuangbin Li   |
| Xiangya Hospital Central South University                   | Central China   | Hunan     | Changsha  | Tianlun Yang   |
| Guangzhou Red Cross Hospital                                | Southern China  | Guangdong | Guangzhou | Tongguo Wu     |
| The First Affiliated Hospital of Guangzhou Medical College  | Southern China  | Guangdong | Guangzhou | Wei Wang       |
| The First Affiliated Hospital of Wenzhou Medical University | Eastern China   | Zhejiang  | Wenzhou   | Weijian Huang  |
| The Second Affiliated Hospital of Soochow University        | Eastern China   | Jiangsu   | Suzhou    | Weiting Xu     |
| Wuhan Asia Heart Hospital                                   | Central China   | Hubei     | Wuhan     | Xi Su          |
| The First Affiliated Hospital of Soochow University         | Eastern China   | Jiangsu   | Suzhou    | Xiangjun Yang  |
| Affiliated Hospital of Yan'an University                    | Northwest China | Shaanxi   | Yan'an    | Xiaochuan Ma   |
| The First People's Hospital of Jining                       | Eastern China   | Shandong  | Jining    | Xiaofei Sun    |
| The Central Hospital of Taiyuan                             | Northern China  | Shanxi    | Taiyuan   | Xiaoping Chen  |
| West China Hospital of Sichuan University                   | Northwest China | Sichuan   | Chengdu   | Xiaoping Chen  |
| The Third Affiliated Hospital of Guangzhou Medical College  | Southern China  | Guangdong | Guangzhou | Ximing Chen    |
| The First Affiliated Hospital of Wannan Medical College     | Eastern China   | Anhui     | Wuhu      | Xingsheng Tang |
| Tangdu Hospital of The Fourth Military Medical University   | Northwest China | Shaanxi   | Xi'an     | Xue Li         |
| Shanghai East Hospital Affiliated to Tongji University      | Eastern China   | Shanghai  | Shanghai  | Xuebo Liu      |
| Xiamen Cardiovascular Disease Hospital                      | Eastern China   | Fujian    | Xiamen    | Yan Wang       |

| Hospitals                                                  | Territories     | Provinces    | City     | Investigator |
|------------------------------------------------------------|-----------------|--------------|----------|--------------|
| Zhongnan hospital of Wuhan University                      | Central China   | Hubei        | Wuhan    | Yanggan Wang |
| Fujian Provincial Hospital                                 | Eastern China   | Fujian       | Fuzhou   | Yansong Guo  |
| The First Affiliated hospital of Dalian Medical University | Northeast China | Liaoning     | Dalian   | Yanzong Yang |
| The First People's Hospital of Changde                     | Central China   | Hunan        | Changde  | Yi Huang     |
| The First Affiliated Hospital of China Medical University  | Northeast China | Liaoning     | Shenyang | Yingxian Sun |
| The Fourth Affiliated Hospital of China Medical University | Northeast China | Liaoning     | Shenyang | Yuanzhe Jin  |
| Cangzhou Central Hospital                                  | Northern China  | Hebei        | Cangzhou | Zesheng Xu   |
| The Central Hospital of Shaoyang                           | Central China   | Hunan        | Shaoyang | Zewei Ouyang |
| The People's Hospital of Liaoning Province                 | Northeast China | Liaoning     | Shenyang | Zhanquan Li  |
| The First Affiliated Hospital of Jiamusi University        | Northeast China | Heilongjiang | Jiamusi  | Zhaofa He    |
| Tangshan Gongren Hospital                                  | Northern China  | Hebei        | Tangshan | Zheng Ji     |
| Huaibei Miners General Hospital                            | Eastern China   | Anhui        | Huaibei  | Zhenqi Su    |
| Linyi People's Hospital                                    | Eastern China   | Shandong     | Linyi    | Zhihong Ou   |

**Table S4. Case Report Form of CCC-AF**

**Improving Care for Cardiovascular Disease in China :**  
**A collaborative project of AHA and CSC**  
**Atrial Firbrillation-CRF**

**A. Demographics**

|                                                                                                                                                                                                                                  |  |                                                                                                                                                                                                                                                  |  |                                                  |  |
|----------------------------------------------------------------------------------------------------------------------------------------------------------------------------------------------------------------------------------|--|--------------------------------------------------------------------------------------------------------------------------------------------------------------------------------------------------------------------------------------------------|--|--------------------------------------------------|--|
| 0 Name: _____                                                                                                                                                                                                                    |  | 1 Sex : <input type="radio"/> Male <input type="radio"/> Female                                                                                                                                                                                  |  | 2 Date of Birth: _____                           |  |
| 3 Medical Record ID: _____                                                                                                                                                                                                       |  | 4 Personal ID: _____ <input type="radio"/> Unknown                                                                                                                                                                                               |  | 5 Other ID: _____                                |  |
| 6 Tel.: _____                                                                                                                                                                                                                    |  | 7 Relationship of Contact Person with Patient: _____                                                                                                                                                                                             |  | 8 Name of Contact Person: _____                  |  |
| 9 Tel. of the contact person: _____                                                                                                                                                                                              |  | 10 Ethnic Group: <input type="radio"/> Han <input type="radio"/> Manchu <input type="radio"/> Zhuang <input type="radio"/> Hui <input type="radio"/> Mongol <input type="radio"/> Uyghur <input type="radio"/> Kazak <input type="radio"/> Other |  |                                                  |  |
| 11 Address: _____ Province _____ City _____ District _____ Street _____ No. _____ <input type="radio"/> Unknown                                                                                                                  |  |                                                                                                                                                                                                                                                  |  | 12 Zip code: _____ <input type="radio"/> Unknown |  |
| 13 Education: <input type="radio"/> Primary school or below <input type="radio"/> Middle school <input type="radio"/> High school <input type="radio"/> University/college undergraduate                                         |  | 14 <input type="radio"/> Master's degree or above <input type="radio"/> Unknown                                                                                                                                                                  |  |                                                  |  |
| 15 Occupation: <input type="radio"/> Managerial, administrative or official <input type="radio"/> Professional and technical <input type="radio"/> Service <input type="radio"/> Agriculture <input type="radio"/> Manufacturing |  | 16 <input type="radio"/> Retired <input type="radio"/> Unemployed <input type="radio"/> Others                                                                                                                                                   |  |                                                  |  |
| 17 Marriage Status : <input type="radio"/> Single <input type="radio"/> Married <input type="radio"/> Divorced <input type="radio"/> Widowed <input type="radio"/> Other                                                         |  |                                                                                                                                                                                                                                                  |  |                                                  |  |
| 18 Medical Insurance: <input type="radio"/> Urban employees-basic medical insurance <input type="radio"/> Urban residents - basic medical insurance                                                                              |  | 19 <input type="radio"/> New rural cooperative medical insurance <input type="radio"/> Commercial medical insurance <input type="radio"/> Full government-paying                                                                                 |  |                                                  |  |
| 20 <input type="radio"/> Self-paying <input type="radio"/> Other medical insurance <input type="radio"/> Other                                                                                                                   |  |                                                                                                                                                                                                                                                  |  |                                                  |  |

**B. Arrival and Admission Information**

|                                                                                                                                                                                                    |  |                                                                                      |  |                            |  |
|----------------------------------------------------------------------------------------------------------------------------------------------------------------------------------------------------|--|--------------------------------------------------------------------------------------|--|----------------------------|--|
| 21 Department: <input type="radio"/> Cardiology <input type="radio"/> Internal medicine <input type="radio"/> Other: _____                                                                         |  | 22 Ward Number: _____                                                                |  | 23 Doctor in Charge: _____ |  |
| 24 Arrival Date and Time: ____/____/____ : ____                                                                                                                                                    |  | 25 <input type="radio"/> MM/DD/YYYY only <input type="radio"/> Unknown               |  |                            |  |
| 26 Admit Date: ____/____/____                                                                                                                                                                      |  | 27 Intra-hospital transportation: <input type="radio"/> No <input type="radio"/> Yes |  |                            |  |
| 28 Point of Origin for Admission or Visit: <input type="radio"/> Clinic <input type="radio"/> Emergency room <input type="radio"/> Transferred from another hospital <input type="radio"/> Unknown |  |                                                                                      |  |                            |  |

**C. Medical History**

|                                                                                                                                                                                                                                                   |                                                                                |                                                                                                                |                                                                                                 |
|---------------------------------------------------------------------------------------------------------------------------------------------------------------------------------------------------------------------------------------------------|--------------------------------------------------------------------------------|----------------------------------------------------------------------------------------------------------------|-------------------------------------------------------------------------------------------------|
| 29<br>30<br>31<br>32<br>33<br>34<br>35<br>36<br>37<br>38<br>39<br>40<br>41<br>42<br>43<br>44<br>45<br>46<br>47<br>48<br>49<br>50<br>51<br>52<br>53<br>54<br>55<br>56<br>57<br>58<br>59<br>60<br><b>Medical History</b><br>(Select all that apply) | <input type="checkbox"/> None                                                  | <input type="checkbox"/> Heart failure                                                                         | <input type="checkbox"/> Upper gastrointestinal hemorrhage                                      |
|                                                                                                                                                                                                                                                   | <input type="checkbox"/> Smoker                                                | <input type="checkbox"/> Family history of AF                                                                  | <input type="checkbox"/> Gastrointestinal                                                       |
|                                                                                                                                                                                                                                                   | <input type="checkbox"/> Alcohol use                                           | <input type="checkbox"/> Cardiac transplantation                                                               | <input type="checkbox"/> Other                                                                  |
|                                                                                                                                                                                                                                                   | <input type="checkbox"/> Hypertension history                                  | <input type="checkbox"/> Cardiomyopathy                                                                        | <input type="checkbox"/> Obstructive sleep apnea                                                |
|                                                                                                                                                                                                                                                   | <input type="checkbox"/> Uncontrolled, SBP > 160 mmHg                          | <input type="checkbox"/> Ischemic                                                                              | <input type="radio"/> CPAP                                                                      |
|                                                                                                                                                                                                                                                   | <input type="checkbox"/> Diabetes                                              | <input type="checkbox"/> Non-Ischemic                                                                          | <input type="checkbox"/> COPD                                                                   |
|                                                                                                                                                                                                                                                   | <input type="checkbox"/> Coronary artery disease                               | <input type="checkbox"/> Rheumatic heart disease                                                               | <input type="checkbox"/> Renal Disease                                                          |
|                                                                                                                                                                                                                                                   | <input type="checkbox"/> Prior MI                                              | <input type="checkbox"/> Mechanical prosthetic heart valve                                                     | <input type="checkbox"/> Dialysis                                                               |
|                                                                                                                                                                                                                                                   | <input type="checkbox"/> Prior PCI                                             | <input type="checkbox"/> Mitral stenosis                                                                       | <input type="checkbox"/> Transplant                                                             |
|                                                                                                                                                                                                                                                   | <input type="checkbox"/> Bare metal stent                                      | <input type="checkbox"/> CVA/TIA                                                                               | <input type="checkbox"/> Cr >2.6 mg/dL or >200, μmol/L                                          |
|                                                                                                                                                                                                                                                   | <input type="checkbox"/> Drug eluting stent                                    | <input type="checkbox"/> Ischemic stroke                                                                       | <input type="checkbox"/> Liver disease (Cirrhosis, Bilirubin >2x Normal, AST/ALT/AP >3x Normal) |
|                                                                                                                                                                                                                                                   | <input type="checkbox"/> CRT-D (cardiac resynchronization therapy w/ICD)       | <input type="checkbox"/> ICH                                                                                   | <input type="checkbox"/> Thyroid Disease                                                        |
|                                                                                                                                                                                                                                                   | <input type="checkbox"/> CRT-P (cardiac resynchronization therapy-pacing only) | <input type="checkbox"/> TIA                                                                                   | <input type="checkbox"/> Hyperthyroidism                                                        |
|                                                                                                                                                                                                                                                   | <input type="checkbox"/> Pacemaker                                             | <input type="checkbox"/> Cognitive impairment                                                                  | <input type="checkbox"/> Hypothyroidism                                                         |
|                                                                                                                                                                                                                                                   | <input type="checkbox"/> Sinus node dysfunction/ sick sinus syndrome           | <input type="checkbox"/> Depression                                                                            | <input type="checkbox"/> Anemia                                                                 |
| <input type="checkbox"/> LAA occlusion device                                                                                                                                                                                                     | <input type="checkbox"/> Peripheral arterial disease                           | <input type="checkbox"/> Cancer                                                                                |                                                                                                 |
|                                                                                                                                                                                                                                                   | <input type="checkbox"/> Deep vein thrombosis                                  | <input type="checkbox"/> Prior major bleeding or predisposition to bleeding (bleeding diathesis, anemia, etc.) |                                                                                                 |
|                                                                                                                                                                                                                                                   | <input type="checkbox"/> Pulmonary embolism                                    |                                                                                                                |                                                                                                 |



1  
2  
3  
4  
5  
6  
7  
8  
9  
10  
11  
12  
13  
14  
15  
16  
17  
18  
19  
20  
21  
22  
23  
24  
25  
26  
27  
28  
29  
30  
31  
32  
33  
34  
35  
36  
37  
38  
39  
40  
41  
42  
43  
44  
45  
46  
47  
48  
49  
50  
51  
52  
53  
54  
55  
56  
57  
58  
59  
60

**F. Exam/ Labs at Admission**

|                                                                |                                                                                                                                                                                                                                                                                                                                                                                                                                                                                                                        |                                                                                                                                                       |                                                                                                                                                     |
|----------------------------------------------------------------|------------------------------------------------------------------------------------------------------------------------------------------------------------------------------------------------------------------------------------------------------------------------------------------------------------------------------------------------------------------------------------------------------------------------------------------------------------------------------------------------------------------------|-------------------------------------------------------------------------------------------------------------------------------------------------------|-----------------------------------------------------------------------------------------------------------------------------------------------------|
| Presentation Symptoms Related to AF<br>(Select all that apply) | <input type="checkbox"/> No reported symptoms<br><input type="checkbox"/> Syncope<br><input type="checkbox"/> Fatigue                                                                                                                                                                                                                                                                                                                                                                                                  | <input type="checkbox"/> Chestpain/tightness/discomfort<br><input type="checkbox"/> Weakness<br><input type="checkbox"/> Palpitations dyspnea at rest | <input type="checkbox"/> Exercise intolerance<br><input type="checkbox"/> Dyspnea at exertion<br><input type="checkbox"/> Lightheadedness/dizziness |
| Classification of AF-related Symptoms (EHRA score)             | <input type="radio"/> EHRA I No symptoms<br><input type="radio"/> EHRA II Mild symptoms; normal daily activity not affected<br><input type="radio"/> EHRA III Severe symptoms; normal daily activity affected<br><input type="radio"/> EHRA IV Disabling symptoms; normal daily activity discontinued                                                                                                                                                                                                                  |                                                                                                                                                       |                                                                                                                                                     |
| Initial Vital Signs                                            | Height _____ cm <input type="checkbox"/> Unknown                                                                                                                                                                                                                                                                                                                                                                                                                                                                       | Weight _____ kg <input type="checkbox"/> Unknown                                                                                                      |                                                                                                                                                     |
|                                                                | Heart Rate _____ bpm <input type="checkbox"/> Unknown                                                                                                                                                                                                                                                                                                                                                                                                                                                                  | BP _____/_____ mmHg (SBP/DBP) <input type="checkbox"/> Unknown                                                                                        |                                                                                                                                                     |
| Initial Presenting Rhythm(s)<br>(Select all that apply)        | <input type="checkbox"/> Atrial fibrillation<br><input type="checkbox"/> Atrial flutter                                                                                                                                                                                                                                                                                                                                                                                                                                | <input type="checkbox"/> Sinus rhythm<br><input type="checkbox"/> Atrial tachycardia                                                                  | <input type="checkbox"/> Paced<br><input type="checkbox"/> Other                                                                                    |
| If Paced, underlying Atrial Rhythm                             | <input type="radio"/> Sinus Rhythm <input type="radio"/> Atrial fib/flutter <input type="radio"/> Sinus arrest <input type="radio"/> Not available                                                                                                                                                                                                                                                                                                                                                                     |                                                                                                                                                       |                                                                                                                                                     |
| If Paced, Pacing Type                                          | <input type="radio"/> Atrial pacing <input type="radio"/> Ventricular pacing <input type="radio"/> Atrial pacing                                                                                                                                                                                                                                                                                                                                                                                                       |                                                                                                                                                       |                                                                                                                                                     |
| Automated ECG                                                  | <input type="radio"/> No <input type="radio"/> Yes                                                                                                                                                                                                                                                                                                                                                                                                                                                                     |                                                                                                                                                       |                                                                                                                                                     |
| Initial EKG Findings                                           | Resting Heart Rate (bpm) _____ <input type="checkbox"/> Not Available                                                                                                                                                                                                                                                                                                                                                                                                                                                  | QTc (ms) _____ <input type="checkbox"/> Not Available                                                                                                 |                                                                                                                                                     |
|                                                                | QRS duration (ms) _____ <input type="checkbox"/> Not Available                                                                                                                                                                                                                                                                                                                                                                                                                                                         | PR interval(ms) _____ <input type="checkbox"/> Not Available                                                                                          |                                                                                                                                                     |
| Echocardiography Result                                        | LVEF _____% <input type="checkbox"/> Not available<br>Obtained: <input type="radio"/> This Admission <input type="radio"/> W/in the last year <input type="radio"/> > 1 year ago<br>Left ventricular end-diastolic diameter (LVEDD): _____ mm <input type="checkbox"/> Not available<br>Left ventricular end-systolic diameter(LVESD): _____ mm <input type="checkbox"/> Not available<br>Thrombus: <input type="radio"/> No <input type="radio"/> Yes<br>Atrium Size: _____ mm <input type="checkbox"/> Not available |                                                                                                                                                       |                                                                                                                                                     |
| Labs<br>(closest to admission)                                 | Platelet Count _____ g/L <input type="checkbox"/> Not available                                                                                                                                                                                                                                                                                                                                                                                                                                                        | Hematocrit _____% <input type="checkbox"/> Not available                                                                                              |                                                                                                                                                     |
|                                                                | Hemoglobin _____ g/L <input type="checkbox"/> Not available                                                                                                                                                                                                                                                                                                                                                                                                                                                            | INR _____ <input type="checkbox"/> Not available                                                                                                      |                                                                                                                                                     |
|                                                                | SCr _____ mg/dL <input type="radio"/> μmol/L <input type="checkbox"/> Not available                                                                                                                                                                                                                                                                                                                                                                                                                                    | BUN _____ mg/dL <input type="radio"/> μmol/L <input type="checkbox"/> Not available                                                                   |                                                                                                                                                     |
|                                                                | K _____ mEq/L <input type="radio"/> mmol/L <input type="radio"/> mg/dL <input type="checkbox"/> Not available                                                                                                                                                                                                                                                                                                                                                                                                          | Mg _____ mg/dL <input type="radio"/> mmol/L <input type="checkbox"/> Not available                                                                    |                                                                                                                                                     |
|                                                                | TSH _____ mIU/L <input type="checkbox"/> Not available                                                                                                                                                                                                                                                                                                                                                                                                                                                                 | BNP _____ pg/mL <input type="radio"/> pmol/L <input type="radio"/> ng/L <input type="checkbox"/> Not available                                        |                                                                                                                                                     |
|                                                                | NT-BNP _____ (pg/mL) <input type="checkbox"/> Not available                                                                                                                                                                                                                                                                                                                                                                                                                                                            |                                                                                                                                                       |                                                                                                                                                     |

**G. In-Hospital Care**

|                                        |                                                                                                                                                                                                                                                                                                                                                                                                                                                                             |                                                                                                                                                                                                                                                                                                                                                                                                                                                                                                                                                    |
|----------------------------------------|-----------------------------------------------------------------------------------------------------------------------------------------------------------------------------------------------------------------------------------------------------------------------------------------------------------------------------------------------------------------------------------------------------------------------------------------------------------------------------|----------------------------------------------------------------------------------------------------------------------------------------------------------------------------------------------------------------------------------------------------------------------------------------------------------------------------------------------------------------------------------------------------------------------------------------------------------------------------------------------------------------------------------------------------|
| Procedures during this hospitalization | <input type="checkbox"/> No procedures<br><input type="checkbox"/> A-Fib ablation<br><input type="checkbox"/> A-Flutter ablation<br><i>If A-Fib or A-Flutter ablation selected above:</i><br><input type="radio"/> Cryoablation<br><input type="radio"/> Radio frequency ablation<br><input type="checkbox"/> Cardioversion (check all that apply below)<br><input type="checkbox"/> Chemical<br><input type="checkbox"/> Electrical<br><input type="checkbox"/> TEE guided | <input type="checkbox"/> CRT-D (cardiac resynchronization therapy w/ICD)<br><input type="checkbox"/> CRT-P (cardiac resynchronization therapy-pacing only)<br><input type="checkbox"/> ICD only<br><input type="checkbox"/> LAA occlusion device<br><input type="checkbox"/> Mechanical prosthetic heart valve<br><input type="checkbox"/> Pacemaker<br><input type="checkbox"/> PCI/Cardiac catheterization<br><input type="checkbox"/> Bare metal stent<br><input type="checkbox"/> Drug eluting stent<br><input type="checkbox"/> Surgical MAZE |
|----------------------------------------|-----------------------------------------------------------------------------------------------------------------------------------------------------------------------------------------------------------------------------------------------------------------------------------------------------------------------------------------------------------------------------------------------------------------------------------------------------------------------------|----------------------------------------------------------------------------------------------------------------------------------------------------------------------------------------------------------------------------------------------------------------------------------------------------------------------------------------------------------------------------------------------------------------------------------------------------------------------------------------------------------------------------------------------------|

1  
2  
3  
4  
5  
6  
7  
8  
9  
10  
11  
12  
13  
14  
15  
16  
17  
18  
19  
20  
21  
22  
23  
24  
25  
26  
27  
28  
29  
30  
31  
32  
33  
34  
35  
36  
37  
38  
39  
40  
41  
42  
43  
44  
45  
46  
47  
48  
49  
50  
51  
52  
53  
54  
55  
56  
57  
58  
59  
60

|                                                                         |                                                                                                                                                                                                                                                                                                                                                    |                                                                                                                                                                                                                                                                                                                                                                                |                                                                                                                                                                                                                                                                                                                             |
|-------------------------------------------------------------------------|----------------------------------------------------------------------------------------------------------------------------------------------------------------------------------------------------------------------------------------------------------------------------------------------------------------------------------------------------|--------------------------------------------------------------------------------------------------------------------------------------------------------------------------------------------------------------------------------------------------------------------------------------------------------------------------------------------------------------------------------|-----------------------------------------------------------------------------------------------------------------------------------------------------------------------------------------------------------------------------------------------------------------------------------------------------------------------------|
| Oral Medications during hospitalization<br><i>Select all that apply</i> | <input type="checkbox"/> None<br><input type="checkbox"/> Antiarrhythmic<br><input type="checkbox"/> Amiodarone<br><input type="checkbox"/> Dofetilide<br><input type="checkbox"/> Dronedaron<br><input type="checkbox"/> Flecainide<br><input type="checkbox"/> Propafenone<br><input type="checkbox"/> Sotalol<br><input type="checkbox"/> Other | <input type="checkbox"/> Antiplatelet agent (not aspirin)<br><input type="checkbox"/> Aggrenox (Dipyridamole)<br><input type="checkbox"/> Brilinta (Ticagrelor)<br><input type="checkbox"/> Clopidogrel<br><input type="checkbox"/> Prasugrel (Effient)<br><input type="checkbox"/> Ticlid (Ticlopidine)<br><input type="checkbox"/> Other<br><input type="checkbox"/> Aspirin | <input type="checkbox"/> Anticoagulant<br><input type="checkbox"/> Warfarin<br><input type="checkbox"/> Dabigatran<br><input type="checkbox"/> Apixiban<br><input type="checkbox"/> Rivaroxiban<br><input type="checkbox"/> Ca channel blocker<br><input type="checkbox"/> Beta Blocker<br><input type="checkbox"/> Digoxin |
|-------------------------------------------------------------------------|----------------------------------------------------------------------------------------------------------------------------------------------------------------------------------------------------------------------------------------------------------------------------------------------------------------------------------------------------|--------------------------------------------------------------------------------------------------------------------------------------------------------------------------------------------------------------------------------------------------------------------------------------------------------------------------------------------------------------------------------|-----------------------------------------------------------------------------------------------------------------------------------------------------------------------------------------------------------------------------------------------------------------------------------------------------------------------------|

|                                        |                                                                                                                                                             |
|----------------------------------------|-------------------------------------------------------------------------------------------------------------------------------------------------------------|
| Parenteral In-Hospital Anticoagulation | <input type="radio"/> None <input type="radio"/> Unfractionated Heparin iv. <input type="radio"/> LMW Heparin <input type="radio"/> Other iv. Anticoagulant |
|----------------------------------------|-------------------------------------------------------------------------------------------------------------------------------------------------------------|

|                                                |                                                                 |
|------------------------------------------------|-----------------------------------------------------------------|
| CHADS2 reported?(in medical record)            | <input type="radio"/> No <input type="radio"/> Yes, Score _____ |
| If yes, total reported score in medical record |                                                                 |

**H. Discharge Information**

|                                           |                                          |
|-------------------------------------------|------------------------------------------|
| Discharge Date/Time ____/____/____ : ____ | <input type="checkbox"/> MM/DD/YYYY only |
|-------------------------------------------|------------------------------------------|

|                                       |                                                                                                                                                         |
|---------------------------------------|---------------------------------------------------------------------------------------------------------------------------------------------------------|
| Vital Signs<br>(closest to discharge) | BP-Supine _____/_____ mmHg (systolic/diastolic) <input type="checkbox"/> Not documented<br>Heart Rate _____ bpm <input type="checkbox"/> Not documented |
|---------------------------------------|---------------------------------------------------------------------------------------------------------------------------------------------------------|

|                                               |                                                                                                                                                                                                                                         |
|-----------------------------------------------|-----------------------------------------------------------------------------------------------------------------------------------------------------------------------------------------------------------------------------------------|
| Discharge Rhythm(s)<br>(closest to discharge) | <input type="checkbox"/> Atrial Fibrillation <input type="checkbox"/> Sinus Rhythm <input type="checkbox"/> Paced<br><input type="checkbox"/> Atrial Flutter <input type="checkbox"/> Atrial Tachycardia <input type="checkbox"/> Other |
|-----------------------------------------------|-----------------------------------------------------------------------------------------------------------------------------------------------------------------------------------------------------------------------------------------|

|                                      |                                                                                                                                                                                                                                       |
|--------------------------------------|---------------------------------------------------------------------------------------------------------------------------------------------------------------------------------------------------------------------------------------|
| EKG findings (closest to discharge): | Resting Heart Rate (bpm) <input type="checkbox"/> Not Available   QTC (ms) <input type="checkbox"/> Not Available<br>QRS duration(ms) <input type="checkbox"/> Not Available   PR interval(ms) <input type="checkbox"/> Not Available |
|--------------------------------------|---------------------------------------------------------------------------------------------------------------------------------------------------------------------------------------------------------------------------------------|

|                              |                                                                                                                                                      |
|------------------------------|------------------------------------------------------------------------------------------------------------------------------------------------------|
| Discharge EKG QRS Morphology | <input type="radio"/> Normal <input type="radio"/> RBBB <input type="radio"/> LBBB <input type="radio"/> NS-TVCD <input type="radio"/> Not Available |
|------------------------------|------------------------------------------------------------------------------------------------------------------------------------------------------|

|                                |                                                                                                                                                                                                                     |
|--------------------------------|---------------------------------------------------------------------------------------------------------------------------------------------------------------------------------------------------------------------|
| Labs<br>(closest to discharge) | Platelet Count _____ g/L <input type="checkbox"/> Not Available   INR _____ <input type="checkbox"/> Not Available<br>SCr _____ mg/dL <input type="checkbox"/> Not Available <input type="checkbox"/> Not Available |
|--------------------------------|---------------------------------------------------------------------------------------------------------------------------------------------------------------------------------------------------------------------|

**I. Discharge Medication**

|                         |                                                                                                                                                                                                                                                                                    |
|-------------------------|------------------------------------------------------------------------------------------------------------------------------------------------------------------------------------------------------------------------------------------------------------------------------------|
| Anticoagulation Therapy | Prescribed? <input type="radio"/> No <input type="radio"/> Yes<br>If yes,<br>Medication: _____ Dosage: _____ mg Frequency: _____ times/day<br>Medication: _____ Dosage: _____ mg Frequency: _____ times/day<br>Contraindicated? <input type="radio"/> No <input type="radio"/> Yes |
|-------------------------|------------------------------------------------------------------------------------------------------------------------------------------------------------------------------------------------------------------------------------------------------------------------------------|

|  |                                                                                                                                                                                                                                                                                                                                                                                                                                                                                                                                                                                                                                                                                                                                                                                                                                                                                                                                            |
|--|--------------------------------------------------------------------------------------------------------------------------------------------------------------------------------------------------------------------------------------------------------------------------------------------------------------------------------------------------------------------------------------------------------------------------------------------------------------------------------------------------------------------------------------------------------------------------------------------------------------------------------------------------------------------------------------------------------------------------------------------------------------------------------------------------------------------------------------------------------------------------------------------------------------------------------------------|
|  | <input type="checkbox"/> Are there any relative or absolute contraindications to oral anticoagulant therapy? (Check all that apply) <ul style="list-style-type: none"> <li><input type="checkbox"/> Allergy</li> <li><input type="checkbox"/> Occupational risk</li> <li><input type="checkbox"/> Prior intracranial hemorrhage</li> <li><input type="checkbox"/> Bleeding Event</li> <li><input type="checkbox"/> Frequent falls/frailty</li> <li><input type="checkbox"/> Physician preference</li> <li><input type="checkbox"/> Recent operation therapy</li> <li><input type="checkbox"/> Unable to adhere/monitor</li> <li><input type="checkbox"/> High bleeding risk</li> <li><input type="checkbox"/> Comorbid illness (e.g. renal/liver)</li> <li><input type="checkbox"/> Need for dual antiplatelet</li> <li><input type="checkbox"/> Patient refusal/preference</li> <li><input type="checkbox"/> Current pregnancy</li> </ul> |
|--|--------------------------------------------------------------------------------------------------------------------------------------------------------------------------------------------------------------------------------------------------------------------------------------------------------------------------------------------------------------------------------------------------------------------------------------------------------------------------------------------------------------------------------------------------------------------------------------------------------------------------------------------------------------------------------------------------------------------------------------------------------------------------------------------------------------------------------------------------------------------------------------------------------------------------------------------|

|         |                                                                                                                                                                                                                   |
|---------|-------------------------------------------------------------------------------------------------------------------------------------------------------------------------------------------------------------------|
| Aspirin | Prescribed? <input type="radio"/> No <input type="radio"/> Yes<br>If yes,<br>Medication: _____ Dosage: _____ mg Frequency: _____ times/day<br>Contraindicated? <input type="radio"/> No <input type="radio"/> Yes |
|---------|-------------------------------------------------------------------------------------------------------------------------------------------------------------------------------------------------------------------|

|                       |                                                                                                                                                                                                             |
|-----------------------|-------------------------------------------------------------------------------------------------------------------------------------------------------------------------------------------------------------|
| Other Antiplatelet(s) | Prescribed? <input type="radio"/> No <input type="radio"/> Yes<br>If yes,<br>Medication: _____ Dosage: _____ mg Frequency: _____ times/day<br>Medication: _____ Dosage: _____ mg Frequency: _____ times/day |
|-----------------------|-------------------------------------------------------------------------------------------------------------------------------------------------------------------------------------------------------------|

1  
2  
3  
4  
5  
6  
7  
8  
9  
10  
11  
12  
13  
14  
15  
16  
17  
18  
19  
20  
21  
22  
23  
24  
25  
26  
27  
28  
29  
30  
31  
32  
33  
34  
35  
36  
37  
38  
39  
40  
41  
42  
43  
44  
45  
46  
47  
48  
49  
50  
51  
52  
53  
54  
55  
56  
57  
58  
59  
60

|                                |                                                                                                                                                                                         |                                                              |
|--------------------------------|-----------------------------------------------------------------------------------------------------------------------------------------------------------------------------------------|--------------------------------------------------------------|
|                                | Contraindicated?                                                                                                                                                                        | <input type="radio"/> No <input type="radio"/> Yes           |
| Beta Blocker                   | Prescribed?                                                                                                                                                                             | <input type="radio"/> No <input type="radio"/> Yes           |
|                                | If yes,                                                                                                                                                                                 | Medication: _____ Dosage: _____mg Frequency: _____ times/day |
|                                | Contraindicated?                                                                                                                                                                        | <input type="radio"/> No <input type="radio"/> Yes           |
| Calcium Channel Blocker        | Prescribed?                                                                                                                                                                             | <input type="radio"/> No <input type="radio"/> Yes           |
|                                | If yes,                                                                                                                                                                                 | Medication: _____ Dosage: _____mg Frequency: _____ times/day |
|                                | Contraindicated?                                                                                                                                                                        | <input type="radio"/> No <input type="radio"/> Yes           |
| Other Antiarrhythmic           | Prescribed?                                                                                                                                                                             | <input type="radio"/> No <input type="radio"/> Yes           |
|                                | If yes,                                                                                                                                                                                 | Medication: _____ Dosage: _____mg Frequency: _____ times/day |
|                                | Were Dofetilide or Sotalol newly initiated or dose increased this hospitalization? <input type="radio"/> No <input type="radio"/> Yes                                                   |                                                              |
|                                | If yes, was a QT interval documented after 5 doses and prior to discharge? <input type="radio"/> No <input type="radio"/> Yes                                                           |                                                              |
| ACEI                           | Prescribed?                                                                                                                                                                             | <input type="radio"/> No <input type="radio"/> Yes           |
|                                | If yes,                                                                                                                                                                                 | Medication: _____ Dosage: _____mg Frequency: _____ times/day |
|                                | Contraindicated?                                                                                                                                                                        | <input type="radio"/> No <input type="radio"/> Yes           |
| ARB                            | Prescribed?                                                                                                                                                                             | <input type="radio"/> No <input type="radio"/> Yes           |
|                                | If yes,                                                                                                                                                                                 | Medication: _____ Dosage: _____mg Frequency: _____ times/day |
|                                | Contraindicated?                                                                                                                                                                        | <input type="radio"/> No <input type="radio"/> Yes           |
| Aldosterone Antagonist         | Prescribed?                                                                                                                                                                             | <input type="radio"/> No <input type="radio"/> Yes           |
|                                | If yes,                                                                                                                                                                                 | Medication: _____ Dosage: _____mg Frequency: _____ times/day |
|                                | Contraindicated?                                                                                                                                                                        | <input type="radio"/> No <input type="radio"/> Yes           |
| Digoxin                        | Prescribed?                                                                                                                                                                             | <input type="radio"/> No <input type="radio"/> Yes           |
|                                | If yes,                                                                                                                                                                                 | Medication: _____ Dosage: _____mg Frequency: _____ times/day |
|                                | Contraindicated?                                                                                                                                                                        | <input type="radio"/> No <input type="radio"/> Yes           |
| Statins Therapy                | Prescribed?                                                                                                                                                                             | <input type="radio"/> No <input type="radio"/> Yes           |
|                                | Contraindicated?                                                                                                                                                                        | <input type="radio"/> No <input type="radio"/> Yes           |
| Hydralazine Nitrate            | Prescribed?                                                                                                                                                                             | <input type="radio"/> No <input type="radio"/> Yes           |
|                                | Contraindicated?                                                                                                                                                                        | <input type="radio"/> No <input type="radio"/> Yes           |
| Other Medications at Discharge | <input type="checkbox"/> Diuretic <input type="radio"/> No <input type="radio"/> Yes <input type="checkbox"/> NSAIDs/COX-2 Inhibitor <input type="radio"/> No <input type="radio"/> Yes |                                                              |

|                                                                                                       |                                                             |                                                     |                                                                                                          |
|-------------------------------------------------------------------------------------------------------|-------------------------------------------------------------|-----------------------------------------------------|----------------------------------------------------------------------------------------------------------|
| <b>4.4. Risk Interventions</b>                                                                        |                                                             |                                                     |                                                                                                          |
| Smoking Cessation Counseling Given                                                                    | <input type="radio"/> No/ Not Documented                    | <input type="radio"/> Yes                           | <input type="radio"/> Not Applicable                                                                     |
| Rhythm Control/Rate Control Strategy Planned/Intended                                                 | <input type="radio"/> Rhythm Control Strategy Planned       | <input type="radio"/> Rate Control Strategy Planned | <input type="radio"/> No Documentation of Strategy                                                       |
| Patient and/or caregiver received education and/or resource materials regarding all of the following: | <input type="checkbox"/> All were addressed (Check all yes) |                                                     |                                                                                                          |
|                                                                                                       | Risk factors Management Follow-up                           | <input type="radio"/> No <input type="radio"/> Yes  | Stroke Risk Medication Adherence When to call provide <input type="radio"/> No <input type="radio"/> Yes |
| Anticoagulation Therapy Education Given                                                               | <input type="radio"/> No                                    | <input type="radio"/> Yes                           |                                                                                                          |

1  
2  
3  
4  
5  
6  
7  
8  
9  
10  
11  
12  
13  
14

|                          |                                                                                                                                                                                                                                                                                                                                                                                                                                                                                                                                                                      |
|--------------------------|----------------------------------------------------------------------------------------------------------------------------------------------------------------------------------------------------------------------------------------------------------------------------------------------------------------------------------------------------------------------------------------------------------------------------------------------------------------------------------------------------------------------------------------------------------------------|
| PT/INR Planned Follow-up | <input type="radio"/> No <input type="radio"/> Yes → Who will be following patients INR? <input type="radio"/> Home INR Monitoring<br><input type="radio"/> Anticoagulation Warfarin Clinic<br><input type="radio"/> Managed by Physician associated with hospital<br><input type="radio"/> Managed by outside physician<br><input type="radio"/> Not documented<br>Date of INR test planned post discharge: ___/___/___ <input type="checkbox"/> Not Documented<br>System Reason for no PT/INR Planned Follow-up <input type="radio"/> No <input type="radio"/> Yes |
|--------------------------|----------------------------------------------------------------------------------------------------------------------------------------------------------------------------------------------------------------------------------------------------------------------------------------------------------------------------------------------------------------------------------------------------------------------------------------------------------------------------------------------------------------------------------------------------------------------|

|                                                                       |                                          |                           |                                      |
|-----------------------------------------------------------------------|------------------------------------------|---------------------------|--------------------------------------|
| Therapeutic Lifestyle Change Diet                                     | <input type="radio"/> No/ Not Documented | <input type="radio"/> Yes | <input type="radio"/> Not Applicable |
| Obesity Weight Management                                             | <input type="radio"/> No/ Not Documented | <input type="radio"/> Yes | <input type="radio"/> Not Applicable |
| Activity Level/Recommendation                                         | <input type="radio"/> No/ Not Documented | <input type="radio"/> Yes | <input type="radio"/> Not Applicable |
| Screening for obstructive sleep apnea (Berlin Questionnaire)          | <input type="radio"/> No/ Not Documented | <input type="radio"/> Yes | <input type="radio"/> Not Applicable |
| Referral for evaluation of obstructive sleep apnea if positive screen | <input type="radio"/> No/ Not Documented | <input type="radio"/> Yes | <input type="radio"/> Not Applicable |
| Discharge medication instruction provided                             | <input type="radio"/> No/ Not Documented | <input type="radio"/> Yes | <input type="radio"/> Not Applicable |

**K. Admin**

Principal Diagnosis: \_\_\_\_\_ Principal Diagnosis Code: \_\_\_\_\_

Other Diagnose 1: \_\_\_\_\_ Other Diagnose Code1: \_\_\_\_\_

Other Diagnose 2: \_\_\_\_\_ Other Diagnose Code2: \_\_\_\_\_

Other Diagnose 3: \_\_\_\_\_ Other Diagnose Code 3: \_\_\_\_\_

Other Diagnose 4: \_\_\_\_\_ Other Diagnose Code 4: \_\_\_\_\_

Other Diagnose 5: \_\_\_\_\_ Other Diagnose Code 5: \_\_\_\_\_

Other Diagnose 6: \_\_\_\_\_ Other Diagnose Code 6: \_\_\_\_\_

Other Diagnose 7: \_\_\_\_\_ Other Diagnose Code 7: \_\_\_\_\_

Principal Procedure: \_\_\_\_\_ Principal Procedure Code: \_\_\_\_\_ Date: \_\_\_/\_\_\_/\_\_\_  Date UTD

Other Procedure 1: \_\_\_\_\_ Other Procedure Code 1: \_\_\_\_\_ Date: \_\_\_/\_\_\_/\_\_\_  Date UTD

Other Procedure 2: \_\_\_\_\_ Other Procedure Code 2: \_\_\_\_\_ Date: \_\_\_/\_\_\_/\_\_\_  Date UTD

Other Procedure 3: \_\_\_\_\_ Other Procedure Code 3: \_\_\_\_\_ Date: \_\_\_/\_\_\_/\_\_\_  Date UTD

Other Procedure 4: \_\_\_\_\_ Other Procedure Code 4: \_\_\_\_\_ Date: \_\_\_/\_\_\_/\_\_\_  Date UTD

During this hospital stay, was the patient enrolled in a clinical trial in which patients with the same condition as the measure set were being studied?  No  Yes

**L. CHADS2 Calculation Tool**

Enabled if "No" is selected for CHADS<sub>2</sub> Reported (in medical record)?

- Prior stroke or TIA
- Age > 75
- Hypertension
- Diabetes
- Congestive Heart Failure

**M. Other Risk Scores**

NOTE: CHADS<sub>2</sub>-VASC is an extension of the CHADS<sub>2</sub> score. It contains additional risk categories and can be used as a complimentary tool in the assessment of thromboembolic risk in atrial fibrillation patients. The AHA/ACC Guidelines support the use of the CHADS<sub>2</sub> score in assessment of thromboembolic risk and



1  
2  
3  
4  
5  
6  
7  
8  
9  
10  
11  
12  
13  
14  
15  
16  
17  
18  
19  
20  
21  
22  
23  
24  
25  
26  
27  
28  
29  
30  
31  
32  
33  
34  
35  
36  
37  
38  
39  
40  
41  
42  
43  
44  
45  
46  
47  
48  
49  
50  
51  
52  
53  
54  
55  
56  
57  
58  
59  
60

Indication for anticoagulation therapy is stratified using the CHADS<sub>2</sub> score.

|                                     |                                                                                                                                                                                                                                                                                                                                                                                                                                                                                  |
|-------------------------------------|----------------------------------------------------------------------------------------------------------------------------------------------------------------------------------------------------------------------------------------------------------------------------------------------------------------------------------------------------------------------------------------------------------------------------------------------------------------------------------|
| <b>CHADS<sub>2</sub>-VASc Score</b> | <input type="checkbox"/> Congestive Heart Failure<br><input type="checkbox"/> Diabetes<br><input type="checkbox"/> Hypertension (blood pressure consistently above 140/90 or treated with hypertension medication)<br><input type="checkbox"/> Prior stroke/TIA/Thromboembolism<br><input type="checkbox"/> Age ≥75<br><input type="checkbox"/> Vascular Disease History (CAD, Prior MI, or PAD)<br><input type="checkbox"/> Age 65-74<br><input type="checkbox"/> Female Gender |
|-------------------------------------|----------------------------------------------------------------------------------------------------------------------------------------------------------------------------------------------------------------------------------------------------------------------------------------------------------------------------------------------------------------------------------------------------------------------------------------------------------------------------------|

Adapted from a methodology used by the American College of Chest Physicians: Lip GY, Niewlatt R, Pisters R, Lane DA, Crijns HJ, et al. Refining clinical risk stratification for predicting stroke and thromboembolism in atrial fibrillation using a novel risk factor-based approach: the euro heart survey on atrial fibrillation. *CHEST* 2010 Feb;137(2):263-72. doi: 10.1378/chest.09-1584. Epub 2009 Sep 17. <http://journal.publications.chestnet.org/article.aspx?articleid=1045174>

**DISCLAIMER: These tools (ATRIA and HAS-BLED) are presented for informational purposes only and not as an endorsement of their use in clinical decision making. Many of the same risk factors for warfarin-related hemorrhage are also risk factors for AF-associated ischemic stroke. The use of these tools as an exclusion for anticoagulation is not part of AHA/ACC guideline-recommended care for patients with AF. Additionally, some of the component elements in the HAS-BLED score, such as Labile INR and Prior Major Bleeding or Pre-Disposition to Bleeding may be difficult to reliably ascertain from the information available in the health record. The HAS- BLED score should be interpreted with this in mind.**

|                         |                                                                                                                                                                                                                                                                                                                                                                                              |
|-------------------------|----------------------------------------------------------------------------------------------------------------------------------------------------------------------------------------------------------------------------------------------------------------------------------------------------------------------------------------------------------------------------------------------|
| <b>ATRIA Risk Score</b> | <input type="checkbox"/> Age ≥ 75 years<br><input type="checkbox"/> Anemia (Defined as Hemoglobin < 13 g/dL in men and < 12 g/dL in women)<br><input type="checkbox"/> History of Hypertension<br><input type="checkbox"/> Severe Renal Disease (defined as a GFR < 30ml/min or on dialysis)<br><input type="checkbox"/> Prior hemorrhage (intracranial, gastrointestinal, other hemorrhage) |
|-------------------------|----------------------------------------------------------------------------------------------------------------------------------------------------------------------------------------------------------------------------------------------------------------------------------------------------------------------------------------------------------------------------------------------|

Adapted from a methodology used by the American College of Cardiology: Fang MC, Go AS, Chang Y, et al. A New Risk Scheme to Predict Warfarin-Associated Hemorrhage: The ATRIA (Anticoagulation and Risk Factors in Atrial Fibrillation) Study. *J Am Coll Cardiol* 2011;58(4):395-401. doi:10.1016/j.jacc.2011.03.031. <http://content.onlinejacc.org/article.aspx?articleid=1146658#Abstract>

|                       |                                                                                                                                                                                                                                                                                                                                                                                                                                                                                                                                                                                                                                                                                                                                                                                                         |
|-----------------------|---------------------------------------------------------------------------------------------------------------------------------------------------------------------------------------------------------------------------------------------------------------------------------------------------------------------------------------------------------------------------------------------------------------------------------------------------------------------------------------------------------------------------------------------------------------------------------------------------------------------------------------------------------------------------------------------------------------------------------------------------------------------------------------------------------|
| <b>HAS-BLED Score</b> | <input type="checkbox"/> Hypertension History (uncontrolled, >160 mmHg systolic)<br><input type="checkbox"/> Renal Disease (Dialysis, transplant, Cr >2.6 mg/dL or >200 μmol/L)<br><input type="checkbox"/> Liver Disease (Chronic Hepatic Disease, including (e.g.) Cirrhosis, Bilirubin >2x Normal, AST/ALT/AP >3x Normal)<br><input type="checkbox"/> Stroke History<br><input type="checkbox"/> Prior Major Bleeding or Predisposition to Bleeding (bleeding diathesis, anemia, etc.)<br><input type="checkbox"/> Labile INR (Unstable/high INRs or time in therapeutic range <60%)<br><input type="checkbox"/> Age > 65<br><input type="checkbox"/> Medication Usage Predisposing to Bleeding (Antiplatelet agents, NSAIDs)<br><input type="checkbox"/> Alcohol Usage History (>20 units per week) |
|-----------------------|---------------------------------------------------------------------------------------------------------------------------------------------------------------------------------------------------------------------------------------------------------------------------------------------------------------------------------------------------------------------------------------------------------------------------------------------------------------------------------------------------------------------------------------------------------------------------------------------------------------------------------------------------------------------------------------------------------------------------------------------------------------------------------------------------------|

Adapted from a methodology used by the American College of Chest Physicians: Pisters R, Lane DA, Nieuwlaat R, de Vos CB, Crijns HM, Lip GH. A novel user-friendly score (Has-bled) to assess 1-year risk of major bleeding in patients with atrial fibrillation: the euro heart survey. *Chest*, 2010;138(5):1093-1100. <http://journal.publications.chestnet.org/article.aspx?articleid=1086288>

**Table S5. Definition of Primary Performance Measures****Primary performance measure 1:****Proportion of patients with nonvalvular atrial fibrillation in whom assessment of thromboembolic risk**

The proportion of patients with nonvalvular atrial fibrillation in whom assessment of thromboembolic risk using CHADS<sub>2</sub> or CHA<sub>2</sub>DS<sub>2</sub>-VASc score have been documented in medical records.

|                                                                                                                                                       |                                                                                                                                                                                                                                                                                                                                                                                                                                                                                                                                                                                                                                                                                                                                                                                                                                                                                                                                           |
|-------------------------------------------------------------------------------------------------------------------------------------------------------|-------------------------------------------------------------------------------------------------------------------------------------------------------------------------------------------------------------------------------------------------------------------------------------------------------------------------------------------------------------------------------------------------------------------------------------------------------------------------------------------------------------------------------------------------------------------------------------------------------------------------------------------------------------------------------------------------------------------------------------------------------------------------------------------------------------------------------------------------------------------------------------------------------------------------------------------|
| <b>Numerator</b>                                                                                                                                      | <p>AF patients reporting CHADS<sub>2</sub> or CHA<sub>2</sub>DS<sub>2</sub>-VASc risk score to assess the thromboembolic risk factors.</p> <p><b>Relevant data elements:</b></p> <p>(CHADS<sub>2</sub>=“Yes” and CHADS<sub>2</sub> score is not NA), or (CHA<sub>2</sub>DS<sub>2</sub>-VASc score=“Yes” and CHA<sub>2</sub>DS<sub>2</sub>-VASc score is not NA)</p>                                                                                                                                                                                                                                                                                                                                                                                                                                                                                                                                                                       |
| <b>Denominator</b>                                                                                                                                    | <p><b>Include:</b></p> <p>Nonvalvular AF patients</p> <p>Relevant data elements:</p> <p>Atrial arrhythmia type=“Nonvalvular atrial fibrillation”</p> <p><b>Exclude:</b></p> <ol style="list-style-type: none"> <li>① Patients with a medical history of mitral stenosis or a mechanical prosthetic heart valve</li> <li>② Patients who are newly diagnosed with mitral stenosis this hospitalization</li> <li>③ Patients who have a mechanic prosthetic heart valve implanted during their hospitalization</li> <li>④ Patients for whom there is a documented contraindication to anticoagulation therapy</li> </ol> <p>Relevant data elements:</p> <ol style="list-style-type: none"> <li>① Medical history of mitral stenosis=“Yes” or mechanic prosthetic heart valve=“Yes”</li> <li>② Mitral stenosis =“Yes”</li> <li>③ Mechanic prosthetic heart valve=“Yes”</li> <li>④ Contraindication to anticoagulation therapy=“Yes”</li> </ol> |
| <b>Evaluation time</b>                                                                                                                                | At discharge                                                                                                                                                                                                                                                                                                                                                                                                                                                                                                                                                                                                                                                                                                                                                                                                                                                                                                                              |
| <b>Data sources</b>                                                                                                                                   | Case records                                                                                                                                                                                                                                                                                                                                                                                                                                                                                                                                                                                                                                                                                                                                                                                                                                                                                                                              |
| <b>Reasons for evaluation</b>                                                                                                                         |                                                                                                                                                                                                                                                                                                                                                                                                                                                                                                                                                                                                                                                                                                                                                                                                                                                                                                                                           |
| The assessment of thromboembolic risk factors according to baseline characters is the foundation to make right decisions for anticoagulation therapy. |                                                                                                                                                                                                                                                                                                                                                                                                                                                                                                                                                                                                                                                                                                                                                                                                                                                                                                                                           |

---

## Guidelines

---

### **AHA/ACC 2014 AF guidelines**

#### *Class I*

In patients with nonvalvular AF, the CHA<sub>2</sub>DS<sub>2</sub>-VASc score is recommended for assessment of stroke risk. (*Level of evidence: B*)

In patients with AF, antithrombotic therapy should be individualized based on shared decision making after discussion of the absolute and RRs of stroke and bleeding, and the patient's values and preferences. (*Level of Evidence: C*)

For patients with atrial flutter, antithrombotic therapy is recommended according to the same risk profile used for AF. (*Level of Evidence: C*)

### **ESC 2010 AF guidelines**

#### *Class I*

The CHADS<sub>2</sub> [cardiac failure, hypertension, age, diabetes, stroke (doubled)] score is recommended as a simple initial (easily remembered) means of assessing stroke risk in non-valvular AF. (*Level of Evidence: A*)

---

## Ways of reporting

---

Percentages and numerator/denominator

---

**Primary performance measure 2 :****Proportion of AF patients with indication prescribed an anticoagulant drug at hospital discharge**

AF patients receiving warfarin, dabigatran, argatroban or rivaroxaban at discharge

**Numerator****Relevant data elements:**

Anticoagulation therapy="Yes", and  
Warfarin="Yes" or dabigatran="Yes" or argatroban="Yes" or rivaroxaban="Yes"

**Include:**

Nonvalvular AF patients with CHA<sub>2</sub>DS<sub>2</sub>-VASc≥2

**Relevant data elements:**

Atrial arrhythmia type="Nonvalvular atrial fibrillation", and  
CHA<sub>2</sub>DS<sub>2</sub>-VASc score ≥2

**Exclude:**

- ① Patients with a medical history of mitral stenosis or a mechanical prosthetic heart valve
- ② Patients who are newly diagnosed with mitral stenosis this hospitalization
- ③ Patients who have a mechanic prosthetic heart valve implanted during their hospitalization
- ④ Patients for whom there is a documented contraindication to anticoagulation therapy
- ⑤ Expire during hospitalization

**Denominator****Relevant data elements:**

- ① Mitral stenosis="Yes" or mechanic prosthetic heart valve="Yes"
- ② Mitral stenosis="Yes"
- ③ Mechanic prosthetic heart valve="Yes"
- ④ Contraindication to anticoagulation therapy="Yes" or any of the following is "Yes": allergy, occupational risk, prior intracranial hemorrhage, bleeding event, frequent falls/frailty, recent operation therapy, unable to adhere/monitor, high bleeding risk, comorbid illness (e.g. renal/liver), patient refusal/preference, or current pregnancy
- ⑤ Expire="Yes"

**Evaluation time** At discharge

**Data sources** Case records

---

### Reasons for evaluation

---

The reasonable anticoagulation therapy can better the quality of life and long-term prognosis of AF patients.

---

### Guidelines

---

#### **AHA/ACC 2014 AF guidelines**

##### *Class I*

For patients with nonvalvular AF with prior stroke, transient ischemic attack (TIA), or a CHA<sub>2</sub>DS<sub>2</sub>-VASC score of 2 or greater, oral anticoagulants are recommended. Options include:

- Warfarin (INR 2.0 to 3.0) (*Level of Evidence: A*)
- Dabigatran, rivaroxaban or apixaban (*Level of Evidence: B*)

For patients with atrial flutter, antithrombotic therapy is recommended according to the same risk profile used for AF. (*Level of Evidence: C*)

##### *Class IIa*

For patients with nonvalvular AF and a CHA<sub>2</sub>DS<sub>2</sub>-VASC score of 0, it is reasonable to omit antithrombotic therapy (81, 82). (*Level of Evidence: B*)

##### *Class IIb*

For patients with nonvalvular AF and a CHA<sub>2</sub>DS<sub>2</sub>-VASC score of 1, no antithrombotic therapy or treatment with an oral anticoagulant or aspirin may be considered. (*Level of Evidence: C*)

#### **ESC 2010 AF guidelines**

##### *Class I*

For the patients with a CHADS<sub>2</sub> score of  $\geq 2$ , chronic oral anticoagulant (OAC) therapy with a vitamin K antagonist (VKA) is recommended in a dose adjusted regimen to achieve an INR range of 2.0–3.0 (target 2.5), unless contraindicated. (*Level of Evidence: A*)

---

### Ways of reporting

---

Percentages and numerator/denominator

---

**Primary performance measure 3 :****Proportion of patients discharged on warfarin who have PT/INR follow-up planned prior to hospital discharge**

The proportion of patients discharged on warfarin who have PT/INR follow-up planned prior to hospital discharge.

|                        |                                                                                                                                                                                                                    |
|------------------------|--------------------------------------------------------------------------------------------------------------------------------------------------------------------------------------------------------------------|
|                        | Patients who have PT/INR follow-up planned prior to hospital discharge                                                                                                                                             |
| <b>Numerator</b>       | <b>Relevant data elements:</b><br>PT/INR follow-up plan="Yes"                                                                                                                                                      |
|                        | <b>Include:</b><br>Patients discharged on warfarin<br><b>Relevant data elements:</b><br>Anticoagulation therapy="Yes", and warfarin="Yes"                                                                          |
| <b>Denominator</b>     | <b>Exclude:</b><br>① System reason for no PT/INR planned follow-up<br>② Expire during hospitalization<br><b>Relevant data elements:</b><br>① System reason for no PT/INR planned follow-up="Yes"<br>② Expire="Yes" |
| <b>Evaluation time</b> | At discharge                                                                                                                                                                                                       |
| <b>Data sources</b>    | Case records                                                                                                                                                                                                       |

**Reasons for evaluation**

Regular anticoagulation therapy, PT/INR planned follow-up and systematic anticoagulation management can lower the risk of thromboembolism and bleeding events.

**Guidelines**

AHA/ACC 2014 AF guidelines

*Class I*

Among patients treated with warfarin, the INR should be determined at least weekly during initiation of antithrombotic therapy and at least monthly when anticoagulation (INR in range) is stable. (*Level of Evidence: A*)

For patients with nonvalvular AF unable to maintain a therapeutic INR level with warfarin, use of a direct thrombin or factor Xa inhibitor (dabigatran, rivaroxaban, or apixaban) is recommended. (*Level of Evidence: C*)

**Ways of reporting**

Percentages and numerator/denominator

**Primary performance measure 4 :**

**Proportion of AF patients with indications receiving ACEI/ARB at discharge**

The proportion of AF patients with indications receiving ACEI/ARB at discharge

The indications refer to: the diagnosis with AMI during this hospitalization; the diagnosis with coronary heart disease during this hospitalization and the comorbidity of hypertension, diabetes mellitus or chronic kidney disease; LVEF<40% according to the case records.

|                  |                                                                 |
|------------------|-----------------------------------------------------------------|
|                  | AF patients receiving ACEI or ARB at discharge                  |
| <b>Numerator</b> | <b>Relevant data elements:</b><br>ACEI = "Yes" , or ARB = "Yes" |

|  |                                                                                                                                                                                                                                                                                                                                                                                                                                                                                                                                                                                                                                                                                                                                                                                                                                                                                                                                                                                                                                                         |
|--|---------------------------------------------------------------------------------------------------------------------------------------------------------------------------------------------------------------------------------------------------------------------------------------------------------------------------------------------------------------------------------------------------------------------------------------------------------------------------------------------------------------------------------------------------------------------------------------------------------------------------------------------------------------------------------------------------------------------------------------------------------------------------------------------------------------------------------------------------------------------------------------------------------------------------------------------------------------------------------------------------------------------------------------------------------|
|  | <p><b>Include:</b></p> <p>AF patients with the following indications:</p> <ul style="list-style-type: none"> <li>① Patients who are newly diagnosed with AMI this hospitalization; or</li> <li>② Patients who are diagnosed with coronary heart disease during their hospitalization and the comorbidity of hypertension, diabetes mellitus or chronic kidney disease; or</li> <li>③ LVEF&lt;40% according to the case records</li> </ul> <p>Relevant data elements:</p> <ul style="list-style-type: none"> <li>① AMI="Yes"; or</li> <li>② Coronary heart disease="Yes", and (a medical history of hypertension="Yes", or diabetes mellitus="Yes", or kidney disease="Yes") ; or</li> <li>③ LVEF&lt; 40%</li> </ul> <p><b>Exclude:</b></p> <ul style="list-style-type: none"> <li>① Contraindication to ACEI and ARB</li> <li>② Expire during hospitalization</li> </ul> <p>Relevant data elements:</p> <ul style="list-style-type: none"> <li>① Contraindication to ACEI="Yes", and Contraindication to ARB = "Yes"</li> <li>② Expire="Yes"</li> </ul> |
|--|---------------------------------------------------------------------------------------------------------------------------------------------------------------------------------------------------------------------------------------------------------------------------------------------------------------------------------------------------------------------------------------------------------------------------------------------------------------------------------------------------------------------------------------------------------------------------------------------------------------------------------------------------------------------------------------------------------------------------------------------------------------------------------------------------------------------------------------------------------------------------------------------------------------------------------------------------------------------------------------------------------------------------------------------------------|

|                        |              |
|------------------------|--------------|
| <b>Evaluation time</b> | At discharge |
|------------------------|--------------|

|                     |              |
|---------------------|--------------|
| <b>Data sources</b> | Case records |
|---------------------|--------------|

**Reasons for evaluation**

ACEI/ARB can lower the recurrence risk of AF.

---

## Guidelines

---

### **AHA/ACC 2014 AF guidelines**

#### *Class IIa*

An ACE inhibitor or angiotensin-receptor blocker (ARB) is reasonable for primary prevention of new-onset AF in patients with HF with reduced LVEF. (*Level of Evidence: B*)

#### *Class IIb*

Therapy with an ACE inhibitor or ARB may be considered for primary prevention of new-onset AF in the setting of hypertension (34, 151). (*Level of Evidence: B*)

#### *Class III: No Benefit*

Therapy with an ACE inhibitor, ARB, or statin is not beneficial for primary prevention of AF in patients without cardiovascular disease. (*Level of Evidence: B*)

### **AHA/ACC 2014 NSTE-ACS guidelines**

#### *CLASS I*

1. ACE inhibitors should be started and continued indefinitely in all patients with LVEF less than 0.40 and in those with hypertension, diabetes mellitus, or stable CKD, unless contraindicated. (*Level of Evidence: A*)
2. ARBs are recommended in patients with HF or MI with LVEF less than 0.40 who are ACE inhibitor intolerant. (*Level of Evidence: A*)
3. Aldosterone blockade is recommended in patients post-MI without significant renal dysfunction (creatinine >2.5 mg/dL in men or >2.0 mg/dL in women) or hyperkalemia ( $K^+$  >5.0 mEq/L) who are receiving therapeutic doses of ACE inhibitor and beta blocker and have a LVEF 0.40 or less, diabetes mellitus, or HF. (*Level of Evidence: A*)

---

## Ways of reporting

---

Percentages and numerator/denominator

---



**Primary performance measure 5:****Proportion of AF patients with indication prescribed a beta blocker at hospital discharge**

The proportion of AF patients with indication prescribed a beta blocker at hospital discharge.

The indication refers to heart failure.

|                  |                                                                                                         |
|------------------|---------------------------------------------------------------------------------------------------------|
| <b>Numerator</b> | AF patients receiving beta blocker at discharge<br><b>Relevant data elements:</b><br>Beta blocker="Yes" |
|------------------|---------------------------------------------------------------------------------------------------------|

|                    |                                                                                                                                                                                                                                                                                                                                                                                        |
|--------------------|----------------------------------------------------------------------------------------------------------------------------------------------------------------------------------------------------------------------------------------------------------------------------------------------------------------------------------------------------------------------------------------|
| <b>Denominator</b> | <p><b>Include:</b></p> <p>AF patients with heart failure</p> <p>Relevant data elements:<br/>Were any of the following first detected on this admission? Heart failure="Yes"</p> <p><b>Exclude:</b></p> <p>① Contraindication to beta blocker<br/>② Expire during hospitalization</p> <p>Relevant data elements:</p> <p>① Contraindication to beta blocker="Yes"<br/>② Expire="Yes"</p> |
|--------------------|----------------------------------------------------------------------------------------------------------------------------------------------------------------------------------------------------------------------------------------------------------------------------------------------------------------------------------------------------------------------------------------|

|                        |              |
|------------------------|--------------|
| <b>Evaluation time</b> | At discharge |
|------------------------|--------------|

|                     |              |
|---------------------|--------------|
| <b>Data sources</b> | Case records |
|---------------------|--------------|

#### Reasons for evaluation

Beta blocker can lower the all-cause mortality and cardiovascular mortality of AF patients.

#### Guidelines

##### ESC 2010 AF guidelines

###### Class I

Blockers are recommended as first-line therapy to control the ventricular rate in patients with heart failure and low LVEF. (*Level of Evidence: A*)

##### AHA/ACC 2014 AF guidelines

###### Class I

Control of resting heart rate using either a beta blocker or a nondihydropyridine calcium channel antagonist is recommended for patients with persistent or permanent AF and compensated HF with preserved EF (HFpEF) (96). (*Level of Evidence: B*)

1  
2  
3  
4  
5  
6  
7  
8  
9  
10  
11  
12  
13  
14  
15  
16  
17  
18  
19  
20  
21  
22  
23  
24  
25  
26  
27  
28  
29  
30  
31  
32  
33  
34  
35  
36  
37  
38  
39  
40  
41  
42  
43  
44  
45  
46  
47  
48  
49  
50  
51  
52  
53  
54  
55  
56  
57  
58  
59  
60

---

In the absence of pre-excitation, intravenous beta blocker administration (or a nondihydropyridine calcium channel antagonist in patients with HFpEF) is recommended to slow the ventricular response to AF in the acute setting, with caution needed in patients with overt congestion, hypotension, or HF with reduced LVEF (180-183). (*Level of Evidence: B*)

---

#### Ways of reporting

---

Percentages and numerator/denominator

---

For peer review only

**Primary performance measure 6 :****Proportion of AF patients with indication prescribed a statin at hospital discharge**

The proportion of AF patients with coronary heart disease, ischemic stroke/TIA, peripheral vascular disease (or diabetes mellitus) prescribed a statin at hospital discharge

|                                                                                                                                                                          |                                                                                                                                                                                                                                                                                                                                                                                                                                                                                                                                                                                                                            |
|--------------------------------------------------------------------------------------------------------------------------------------------------------------------------|----------------------------------------------------------------------------------------------------------------------------------------------------------------------------------------------------------------------------------------------------------------------------------------------------------------------------------------------------------------------------------------------------------------------------------------------------------------------------------------------------------------------------------------------------------------------------------------------------------------------------|
| <b>Numerator</b>                                                                                                                                                         | AF patients receiving statin at discharge<br><b>Relevant data elements:</b><br>Statin="Yes"                                                                                                                                                                                                                                                                                                                                                                                                                                                                                                                                |
| <b>Denominator</b>                                                                                                                                                       | <b>Include:</b><br>AF patients with coronary heart disease, ischemic stroke/TIA, peripheral vascular disease (or diabetes mellitus)<br><b>Relevant data elements:</b><br>In the medical history, coronary heart disease, peripheral vascular disease, ischemic stroke, TIA or diabetes mellitus="Yes" or during this hospitalization, coronary heart disease, diabetes mellitus, peripheral vascular disease, ischemic stroke or TIA="Yes"<br><b>Exclude:</b><br>① Contraindication to statin<br>② Expire during hospitalization<br><b>Relevant data elements:</b><br>① Contraindication to statin="Yes"<br>② Expire="Yes" |
| <b>Evaluation time</b>                                                                                                                                                   | At discharge                                                                                                                                                                                                                                                                                                                                                                                                                                                                                                                                                                                                               |
| <b>Data sources</b>                                                                                                                                                      | Case records                                                                                                                                                                                                                                                                                                                                                                                                                                                                                                                                                                                                               |
| <b>Reasons for evaluation</b>                                                                                                                                            |                                                                                                                                                                                                                                                                                                                                                                                                                                                                                                                                                                                                                            |
| NA                                                                                                                                                                       |                                                                                                                                                                                                                                                                                                                                                                                                                                                                                                                                                                                                                            |
| <b>Guidelines</b>                                                                                                                                                        |                                                                                                                                                                                                                                                                                                                                                                                                                                                                                                                                                                                                                            |
| <b>AHA/ACC 2014 AF guidelines</b>                                                                                                                                        |                                                                                                                                                                                                                                                                                                                                                                                                                                                                                                                                                                                                                            |
| <i>Class IIb</i>                                                                                                                                                         |                                                                                                                                                                                                                                                                                                                                                                                                                                                                                                                                                                                                                            |
| Statin therapy may be reasonable for primary prevention of new-onset AF after coronary artery surgery. ( <i>Level of Evidence: A</i> )                                   |                                                                                                                                                                                                                                                                                                                                                                                                                                                                                                                                                                                                                            |
| <i>Class III: No Benefit</i>                                                                                                                                             |                                                                                                                                                                                                                                                                                                                                                                                                                                                                                                                                                                                                                            |
| Therapy with an ACE inhibitor, ARB, or statin is not beneficial for primary prevention of AF in patients without cardiovascular disease. ( <i>Level of Evidence: B</i> ) |                                                                                                                                                                                                                                                                                                                                                                                                                                                                                                                                                                                                                            |
| <b>ACC F/ AHA 2013 STEMI guidelines</b>                                                                                                                                  |                                                                                                                                                                                                                                                                                                                                                                                                                                                                                                                                                                                                                            |
| Class I                                                                                                                                                                  |                                                                                                                                                                                                                                                                                                                                                                                                                                                                                                                                                                                                                            |
| High-intensity statin therapy should be initiated or continued in all patients with STEMI and no                                                                         |                                                                                                                                                                                                                                                                                                                                                                                                                                                                                                                                                                                                                            |

1  
2  
3  
4  
5  
6  
7  
8  
9  
10  
11  
12  
13  
14  
15  
16  
17  
18  
19  
20  
21  
22  
23  
24  
25  
26  
27  
28  
29  
30  
31  
32  
33  
34  
35  
36  
37  
38  
39  
40  
41  
42  
43  
44  
45  
46  
47  
48  
49  
50  
51  
52  
53  
54  
55  
56  
57  
58  
59  
60

---

contraindications to its use. (Level of Evidence: B)

**AHA/ACC 2014 NSTEMI- guidelines**

Class I

High-intensity statin therapy should be initiated or continued in all patients with NSTEMI-ACS and no contraindications to its use. (Level of Evidence: A)

---

**Ways of reporting**

---

Percentages and numerator/denominator

---

For peer review only

**Table S6. Definition of Secondary Performance Measures****Secondary performance measure 1 :****Proportion of nonvalvular AF patients who had a CHADS<sub>2</sub> score reported**

The proportion of nonvalvular AF patients who had a CHADS<sub>2</sub> score reported to assess the risk of thromboembolism

|                                                                                                                                                                                                                                         |                                                                                                                                                                                                                                                                                                                                                                                                                                                                                                                                                                                                                                                                                                                                                                                                                     |
|-----------------------------------------------------------------------------------------------------------------------------------------------------------------------------------------------------------------------------------------|---------------------------------------------------------------------------------------------------------------------------------------------------------------------------------------------------------------------------------------------------------------------------------------------------------------------------------------------------------------------------------------------------------------------------------------------------------------------------------------------------------------------------------------------------------------------------------------------------------------------------------------------------------------------------------------------------------------------------------------------------------------------------------------------------------------------|
| <b>Numerator</b>                                                                                                                                                                                                                        | The nonvalvular AF patients who had a CHADS <sub>2</sub> score reported<br><b>Relevant data elements:</b><br>CHADS <sub>2</sub> =“Yes” and CHADS <sub>2</sub> score is not NA                                                                                                                                                                                                                                                                                                                                                                                                                                                                                                                                                                                                                                       |
| <b>Denominator</b>                                                                                                                                                                                                                      | <p><b>Include:</b></p> <p>Nonvalvular AF patients</p> <p>Relevant data elements:</p> <p>Atrial arrhythmia type=“Nonvalvular atrial fibrillation”</p> <p><b>Exclude:</b></p> <p>① Patients with a medical history of mitral stenosis or a mechanical prosthetic heart valve</p> <p>② Patients who are newly diagnosed with mitral stenosis this hospitalization</p> <p>③ Patients who have a mechanic prosthetic heart valve implanted during their hospitalization</p> <p>④ Patients for whom there is a documented contraindication to anticoagulation therapy</p> <p>Relevant data elements:</p> <p>① Mitral stenosis=“Yes” or mechanic prosthetic heart valve=“Yes”</p> <p>② Mitral stenosis=“Yes”</p> <p>③ Mechanic prosthetic heart valve=“Yes”</p> <p>④ Contraindication to anticoagulation therapy=“Yes”</p> |
| <b>Evaluation time</b>                                                                                                                                                                                                                  | At discharge                                                                                                                                                                                                                                                                                                                                                                                                                                                                                                                                                                                                                                                                                                                                                                                                        |
| <b>Data sources</b>                                                                                                                                                                                                                     | Case records                                                                                                                                                                                                                                                                                                                                                                                                                                                                                                                                                                                                                                                                                                                                                                                                        |
| <b>Reasons for evaluation</b>                                                                                                                                                                                                           |                                                                                                                                                                                                                                                                                                                                                                                                                                                                                                                                                                                                                                                                                                                                                                                                                     |
| The assessment of thromboembolic risk factors according to baseline characters is the foundation to make right decisions for anticoagulation therapy.                                                                                   |                                                                                                                                                                                                                                                                                                                                                                                                                                                                                                                                                                                                                                                                                                                                                                                                                     |
| <b>Guidelines</b>                                                                                                                                                                                                                       |                                                                                                                                                                                                                                                                                                                                                                                                                                                                                                                                                                                                                                                                                                                                                                                                                     |
| <b>ESC 2010 AF guidelines</b>                                                                                                                                                                                                           |                                                                                                                                                                                                                                                                                                                                                                                                                                                                                                                                                                                                                                                                                                                                                                                                                     |
| <i>Class I</i>                                                                                                                                                                                                                          |                                                                                                                                                                                                                                                                                                                                                                                                                                                                                                                                                                                                                                                                                                                                                                                                                     |
| The CHADS <sub>2</sub> [cardiac failure, hypertension, age, diabetes, stroke (doubled)] score is recommended as a simple initial (easily remembered) means of assessing stroke risk in non-valvular AF. ( <i>Level of Evidence: A</i> ) |                                                                                                                                                                                                                                                                                                                                                                                                                                                                                                                                                                                                                                                                                                                                                                                                                     |

1  
2  
3  
4  
5  
6  
7  
8  
9  
10  
11  
12  
13  
14  
15  
16  
17  
18  
19  
20  
21  
22  
23  
24  
25  
26  
27  
28  
29  
30  
31  
32  
33  
34  
35  
36  
37  
38  
39  
40  
41  
42  
43  
44  
45  
46  
47  
48  
49  
50  
51  
52  
53  
54  
55  
56  
57  
58  
59  
60

---

**Ways of reporting**

---

Percentages and numerator/denominator

---

For peer review only

**Secondary performance measure 2 :****Proportion of nonvalvular AF patients who had a CHA<sub>2</sub>DS<sub>2</sub>-VASc score reported**

The proportion of nonvalvular AF patients who had a CHA<sub>2</sub>DS<sub>2</sub>-VASc score reported to assess the risk of thromboembolism

|                                                                                                                                                                                                                                                 |                                                                                                                                                                                                                                                                                                                                                                                                                                                                                                                                                                                                                                                                                                                                                                             |
|-------------------------------------------------------------------------------------------------------------------------------------------------------------------------------------------------------------------------------------------------|-----------------------------------------------------------------------------------------------------------------------------------------------------------------------------------------------------------------------------------------------------------------------------------------------------------------------------------------------------------------------------------------------------------------------------------------------------------------------------------------------------------------------------------------------------------------------------------------------------------------------------------------------------------------------------------------------------------------------------------------------------------------------------|
| <b>Numerator</b>                                                                                                                                                                                                                                | The nonvalvular AF patients who had a CHA <sub>2</sub> DS <sub>2</sub> -VASc score reported<br><b>Relevant data elements:</b><br>CHA <sub>2</sub> DS <sub>2</sub> -VASc score="Yes", and CHA <sub>2</sub> DS <sub>2</sub> -VASc score is not NA                                                                                                                                                                                                                                                                                                                                                                                                                                                                                                                             |
| <b>Denominator</b>                                                                                                                                                                                                                              | <b>Include:</b><br>Nonvalvular AF patients<br>Relevant data elements:<br>Atrial arrhythmia type="Nonvalvular atrial fibrillation"<br><b>Exclude:</b><br>① Patients with a medical history of mitral stenosis or a mechanical prosthetic heart valve<br>② Patients who are newly diagnosed with mitral stenosis this hospitalization<br>③ Patients who have a mechanic prosthetic heart valve implanted during their hospitalization<br>④ Patients for whom there is a documented contraindication to anticoagulation therapy<br>Relevant data elements:<br>① Medical history of mitral stenosis="Yes" or mechanic prosthetic heart valve="Yes"<br>② Mitral stenosis="Yes"<br>③ Mechanic prosthetic heart valve="Yes"<br>④ Contraindication to anticoagulation therapy="Yes" |
| <b>Evaluation time</b>                                                                                                                                                                                                                          | At discharge                                                                                                                                                                                                                                                                                                                                                                                                                                                                                                                                                                                                                                                                                                                                                                |
| <b>Data sources</b>                                                                                                                                                                                                                             | Case records                                                                                                                                                                                                                                                                                                                                                                                                                                                                                                                                                                                                                                                                                                                                                                |
| <b>Reasons for evaluation</b>                                                                                                                                                                                                                   |                                                                                                                                                                                                                                                                                                                                                                                                                                                                                                                                                                                                                                                                                                                                                                             |
| The assessment of thromboembolic risk factors according to baseline characters is the foundation to make right decisions for anticoagulation therapy.                                                                                           |                                                                                                                                                                                                                                                                                                                                                                                                                                                                                                                                                                                                                                                                                                                                                                             |
| <b>Guidelines</b>                                                                                                                                                                                                                               |                                                                                                                                                                                                                                                                                                                                                                                                                                                                                                                                                                                                                                                                                                                                                                             |
| <b>AHA/ACC 2014 AF guidelines</b>                                                                                                                                                                                                               |                                                                                                                                                                                                                                                                                                                                                                                                                                                                                                                                                                                                                                                                                                                                                                             |
| <i>Class I</i>                                                                                                                                                                                                                                  |                                                                                                                                                                                                                                                                                                                                                                                                                                                                                                                                                                                                                                                                                                                                                                             |
| In patients with nonvalvular AF, the CHA <sub>2</sub> DS <sub>2</sub> -VASc score is recommended for assessment of stroke risk. ( <i>Level of evidence: B</i> )                                                                                 |                                                                                                                                                                                                                                                                                                                                                                                                                                                                                                                                                                                                                                                                                                                                                                             |
| In patients with AF, antithrombotic therapy should be individualized based on shared decision making after discussion of the absolute and RRs of stroke and bleeding, and the patient's values and preferences. ( <i>Level of Evidence: C</i> ) |                                                                                                                                                                                                                                                                                                                                                                                                                                                                                                                                                                                                                                                                                                                                                                             |

1  
2  
3 For patients with atrial flutter, antithrombotic therapy is recommended according to the same  
4 risk profile used for AF. (*Level of Evidence: C*)  
5

6 **Ways of reporting**  
7

8 Percentages and numerator/denominator  
9  
10  
11  
12  
13  
14  
15  
16  
17  
18  
19  
20  
21  
22  
23  
24  
25  
26  
27  
28  
29  
30  
31  
32  
33  
34  
35  
36  
37  
38  
39  
40  
41  
42  
43  
44  
45  
46  
47  
48  
49  
50  
51  
52  
53  
54  
55  
56  
57  
58  
59  
60

For peer review only



**Secondary performance measure 3 :****Proportion of AF patients who have a documented resting heart rate of <80 bpm closest to hospital discharge**

The proportion of AF patients who have a documented resting heart rate of <80 bpm closest to hospital discharge

**Numerator** AF patients who have a documented resting heart rate of <80 bpm closest to hospital discharge  
**Relevant data elements:**  
 Resting heart rate(bpm) <80

**Denominator**  
**Include:**  
 Nonvalvular AF patients  
 Relevant data elements:  
 Atrial arrhythmia type =“Nonvalvular atrial fibrillation”  
**Exclude:**  
 ① Data missing of resting heart rate closest to hospital discharge  
 ② Expire during hospitalization  
 Relevant data elements:  
 ① Resting heart rate(bpm) is NA  
 ② Expire=“Yes”

**Evaluation time** At discharge

**Data sources** Case records

**Reasons for evaluation**

Rate control can better cardiac function and lower the risk of thromboembolism.

**Guidelines****AHA/ACC 2014 AF guidelines***Class IIa*

A heart rate control (resting heart rate <80 bpm) strategy is reasonable for symptomatic management of AF. (*Level of Evidence: B*)

*Class IIb*

A lenient rate-control strategy (resting heart rate <110 bpm) may be reasonable as long as patients remain asymptomatic and LV systolic function is preserved. (*Level of Evidence: B*)

**Ways of reporting**

Percentages and numerator/denominator

**Secondary performance measure 4 :****Proportion of providing anticoagulation therapy education**

The proportion of AF patients who receive anticoagulation drugs at discharge that receiving anticoagulation therapy education during the hospitalization

The anticoagulation therapy education refers to receiving education about anticoagulation therapy or education materials: the effect of anticoagulation drugs, the meaning of TNR planned follow-up and the side effect of anticoagulation drugs.

|                                                                                                                                                                                                                                                        |                                                                                                                                                                                                                                                          |
|--------------------------------------------------------------------------------------------------------------------------------------------------------------------------------------------------------------------------------------------------------|----------------------------------------------------------------------------------------------------------------------------------------------------------------------------------------------------------------------------------------------------------|
| <b>Numerator</b>                                                                                                                                                                                                                                       | AF patients that receiving anticoagulation therapy education<br><b>Relevant data elements:</b><br>Anticoagulation therapy education="Yes"                                                                                                                |
| <b>Denominator</b>                                                                                                                                                                                                                                     | <b>Include:</b><br>Patients that receiving anticoagulation therapy at discharge<br><b>Relevant data elements:</b><br>Anticoagulation therapy="Yes"<br><b>Exclude:</b><br>Expire during hospitalization<br><b>Relevant data elements:</b><br>Expire="Yes" |
| <b>Evaluation time</b>                                                                                                                                                                                                                                 | At discharge                                                                                                                                                                                                                                             |
| <b>Data sources</b>                                                                                                                                                                                                                                    | Case records                                                                                                                                                                                                                                             |
| <b>Reasons for evaluation</b>                                                                                                                                                                                                                          |                                                                                                                                                                                                                                                          |
| Regular anticoagulation therapy, PT/INR planned follow-up and systematic anticoagulation management can lower the risk of thromboembolism and bleeding events. The anticoagulation therapy education is helpful to patients' compliance and prognosis. |                                                                                                                                                                                                                                                          |
| <b>Guidelines</b>                                                                                                                                                                                                                                      |                                                                                                                                                                                                                                                          |
| NA                                                                                                                                                                                                                                                     |                                                                                                                                                                                                                                                          |
| <b>Ways of reporting</b>                                                                                                                                                                                                                               |                                                                                                                                                                                                                                                          |
| Percentages and numerator/denominator                                                                                                                                                                                                                  |                                                                                                                                                                                                                                                          |

**Secondary performance measure 5 :****Proportion of AF patients that receiving conventional medical education**

The proportion of AF patients that receiving the following conventional medical education: risk factors, risk of stroke, management, compliance of drugs, follow-up and when to seek medical help

AF patients that receiving three or more of the following medical education during hospitalization: risk factors, stroke risk, management, medication adherence, follow-up and when to call provide.

**Numerator****Relevant data elements:**

Three or more of risk factors, management, follow-up, stroke risk, medication adherence and when to call provide are "Yes"

**Denominator****Include:**

AF patients

**Exclude:**

Expire during hospitalization

**Relevant data elements:**

Expire="Yes"

**Evaluation time**

At discharge

**Data sources**

Case records

**Reasons for evaluation**

The medical education during hospitalization about risk factors, stroke risk, management, medication adherence, follow-up and when to call provide is helpful to patients' compliance and prognosis.

**Guidelines**

NA

**Ways of reporting**

Percentages and numerator/denominator

**Secondary performance measure 6:****Proportion of AF patients with indication prescribed aldosterone antagonist at discharge**

The proportion of AF patients with indication prescribed aldosterone antagonist at discharge.

The indications refer to: the patient was diagnosed with AMI during this hospitalization with LVEF<40% or heart failure or diabetes mellitus; OR, the heart failure patients with LVEF<35%.

|                                                                                               |                                                                                                                                                                                                                                                                                                                                                                                                                                                                                                                                                                                                                                                                                                                                                                                                                                                                |
|-----------------------------------------------------------------------------------------------|----------------------------------------------------------------------------------------------------------------------------------------------------------------------------------------------------------------------------------------------------------------------------------------------------------------------------------------------------------------------------------------------------------------------------------------------------------------------------------------------------------------------------------------------------------------------------------------------------------------------------------------------------------------------------------------------------------------------------------------------------------------------------------------------------------------------------------------------------------------|
|                                                                                               | AF patients prescribed aldosterone antagonist                                                                                                                                                                                                                                                                                                                                                                                                                                                                                                                                                                                                                                                                                                                                                                                                                  |
| <b>Numerator</b>                                                                              | <p><b>Relevant data elements:</b></p> <p>Aldosterone antagonist = "Yes"</p>                                                                                                                                                                                                                                                                                                                                                                                                                                                                                                                                                                                                                                                                                                                                                                                    |
|                                                                                               | <p><b>Included:</b></p> <p>① The patient was diagnosed with AMI during this hospitalization with LVEF&lt;40% or heart failure or diabetes mellitus; or</p> <p>② The heart failure patients with LVEF&lt;35%.</p> <p>Relevant data elements:</p> <p>① AMI="Yes", and ( LVEF &lt; 40%, or a medical history of heart failure="Yes" or a medical history of diabetes mellitus="Yes", or heart failure="Yes" or diabetes mellitus="Yes" ) ; or</p> <p>② LVEF&lt; 35%, and ( a medical history of heart failure="Yes" or heart failure="Yes" )</p> <p><b>Excluded population:</b></p> <p>① Contraindication to aldosterone antagonist</p> <p>② Expire during hospitalization</p> <p>③ With chronic kidney disease</p> <p>Relevant data elements:</p> <p>① Contraindication to aldosterone antagonist= "Yes"</p> <p>② Expire="Yes"</p> <p>③ Kidney disease="Yes"</p> |
| <b>Denominator</b>                                                                            |                                                                                                                                                                                                                                                                                                                                                                                                                                                                                                                                                                                                                                                                                                                                                                                                                                                                |
| <b>Evaluation time</b>                                                                        | At discharge                                                                                                                                                                                                                                                                                                                                                                                                                                                                                                                                                                                                                                                                                                                                                                                                                                                   |
| <b>Data sources</b>                                                                           | Case records                                                                                                                                                                                                                                                                                                                                                                                                                                                                                                                                                                                                                                                                                                                                                                                                                                                   |
| <b>Reasons for evaluation</b>                                                                 |                                                                                                                                                                                                                                                                                                                                                                                                                                                                                                                                                                                                                                                                                                                                                                                                                                                                |
| NA                                                                                            |                                                                                                                                                                                                                                                                                                                                                                                                                                                                                                                                                                                                                                                                                                                                                                                                                                                                |
| <b>Guidelines</b>                                                                             |                                                                                                                                                                                                                                                                                                                                                                                                                                                                                                                                                                                                                                                                                                                                                                                                                                                                |
| <b>ACC F/ AHA 2013 STEMI guidelines</b>                                                       |                                                                                                                                                                                                                                                                                                                                                                                                                                                                                                                                                                                                                                                                                                                                                                                                                                                                |
| <i>Class I</i>                                                                                |                                                                                                                                                                                                                                                                                                                                                                                                                                                                                                                                                                                                                                                                                                                                                                                                                                                                |
| An aldosterone antagonist should be given to patients with STEMI and no contraindications who |                                                                                                                                                                                                                                                                                                                                                                                                                                                                                                                                                                                                                                                                                                                                                                                                                                                                |

1  
2  
3 are already receiving an ACE inhibitor and beta blocker and who have an EF less than or equal to  
4 0.40 and either symptomatic HF or diabetes mellitus. (*Level of Evidence: B*)

5  
6 **AHA/ACC 2014 NSTEMI-ACS guidelines**

7 *CLASS I*

8  
9 Aldosterone blockade is recommended in patients post-MI without significant renal dysfunction  
10 (creatinine >2.5 mg/dL in men or >2.0 mg/dL in women) or hyperkalemia ( $K^+$  >5.0 mEq/L) who  
11 are receiving therapeutic doses of ACE inhibitor and beta blocker and have a LVEF 0.40 or less,  
12 diabetes mellitus, or HF. (*Level of Evidence: A*)  
13

14  
15 **Ways of reporting**

16 Percentages and numerator/denominator  
17  
18  
19  
20  
21  
22  
23  
24  
25  
26  
27  
28  
29  
30  
31  
32  
33  
34  
35  
36  
37  
38  
39  
40  
41  
42  
43  
44  
45  
46  
47  
48  
49  
50  
51  
52  
53  
54  
55  
56  
57  
58  
59  
60

For peer review only

**Secondary performance measure 7 :****Proportion valvular AF patients prescribed warfarin at hospital discharge**

The proportion valvular AF patients prescribed warfarin at hospital discharge

|                                                                                                                                                                       |                                                                                                                                                                                                                                                                                                                                                                                                 |
|-----------------------------------------------------------------------------------------------------------------------------------------------------------------------|-------------------------------------------------------------------------------------------------------------------------------------------------------------------------------------------------------------------------------------------------------------------------------------------------------------------------------------------------------------------------------------------------|
|                                                                                                                                                                       | The valvular AF patients prescribed warfarin at hospital discharge                                                                                                                                                                                                                                                                                                                              |
| <b>Numerator</b>                                                                                                                                                      | <p><b>Relevant data elements:</b></p> <p>Anticoagulation therapy="Yes", and warfarin="Yes"</p>                                                                                                                                                                                                                                                                                                  |
|                                                                                                                                                                       | <p><b>Include:</b></p> <p>Valvular AF patients</p> <p><b>Relevant data elements:</b></p> <p>Atrial arrhythmia type="valvular atrial fibrillation"</p> <p><b>Exclude:</b></p> <p>① Contraindication to anticoagulation therapy</p> <p>② Expire during hospitalization</p> <p><b>Relevant data elements:</b></p> <p>① Contraindication to anticoagulation therapy="Yes"</p> <p>② Expire="Yes"</p> |
| <b>Denominator</b>                                                                                                                                                    |                                                                                                                                                                                                                                                                                                                                                                                                 |
| <b>Evaluation time</b>                                                                                                                                                | At discharge                                                                                                                                                                                                                                                                                                                                                                                    |
| <b>Data sources</b>                                                                                                                                                   | Case records                                                                                                                                                                                                                                                                                                                                                                                    |
| <b>Reasons for evaluation</b>                                                                                                                                         |                                                                                                                                                                                                                                                                                                                                                                                                 |
| NA                                                                                                                                                                    |                                                                                                                                                                                                                                                                                                                                                                                                 |
| <b>Guidelines</b>                                                                                                                                                     |                                                                                                                                                                                                                                                                                                                                                                                                 |
| <b>ESC 2010 AF guidelines</b>                                                                                                                                         |                                                                                                                                                                                                                                                                                                                                                                                                 |
| <i>Class I</i>                                                                                                                                                        |                                                                                                                                                                                                                                                                                                                                                                                                 |
| Oral anticoagulant therapy (INR 2.0–3.0) is indicated in patients with mitral stenosis and AF (paroxysmal, persistent, or permanent). ( <i>Level of Evidence: C</i> ) |                                                                                                                                                                                                                                                                                                                                                                                                 |
| Oral anticoagulant therapy (INR 2.0–3.0) is recommended in patients with AF and clinically significant mitral regurgitation. ( <i>Level of Evidence: C</i> )          |                                                                                                                                                                                                                                                                                                                                                                                                 |
| <b>Ways of reporting</b>                                                                                                                                              |                                                                                                                                                                                                                                                                                                                                                                                                 |
| Percentages and numerator/denominator                                                                                                                                 |                                                                                                                                                                                                                                                                                                                                                                                                 |

**Secondary performance measure 8 :  
Proportion of AF patients who are given smoking cessation advice or counseling**

The proportion of AF patients with a history of smoking who are given smoking cessation advice or counseling

The history of smoking refers to that the patients smoked one year before hospitalization.

|                                       |                                                                                                                                                                                                                                                                                                                                                  |
|---------------------------------------|--------------------------------------------------------------------------------------------------------------------------------------------------------------------------------------------------------------------------------------------------------------------------------------------------------------------------------------------------|
| <b>Numerator</b>                      | <p>The patients with a history of smoking who are given smoking cessation advice or counseling</p> <p><b>Relevant data elements:</b></p> <p>In the smoking cessation advice or counseling, distribution of publicity materials="Yes", or making smoking cessation plans with patients/families="Yes", or prescription of anti-tobacco remedy</p> |
| <b>Denominator</b>                    | <p><b>Include:</b></p> <p>Patients with a history of smoking</p> <p>Relevant data elements:</p> <p>Smoking="Yes"</p> <p><b>Exclude:</b></p> <p>Expire during hospitalization</p> <p>Relevant data elements:</p> <p>Expire="Yes"</p>                                                                                                              |
| <b>Evaluation time</b>                | At discharge                                                                                                                                                                                                                                                                                                                                     |
| <b>Data sources</b>                   | Case records                                                                                                                                                                                                                                                                                                                                     |
| <b>Reasons for evaluation</b>         |                                                                                                                                                                                                                                                                                                                                                  |
| NA                                    |                                                                                                                                                                                                                                                                                                                                                  |
| <b>Guidelines</b>                     |                                                                                                                                                                                                                                                                                                                                                  |
| NA                                    |                                                                                                                                                                                                                                                                                                                                                  |
| <b>Ways of reporting</b>              |                                                                                                                                                                                                                                                                                                                                                  |
| Percentages and numerator/denominator |                                                                                                                                                                                                                                                                                                                                                  |

Figure S1. Organizational Framework and Governance of the CCC-AF Program

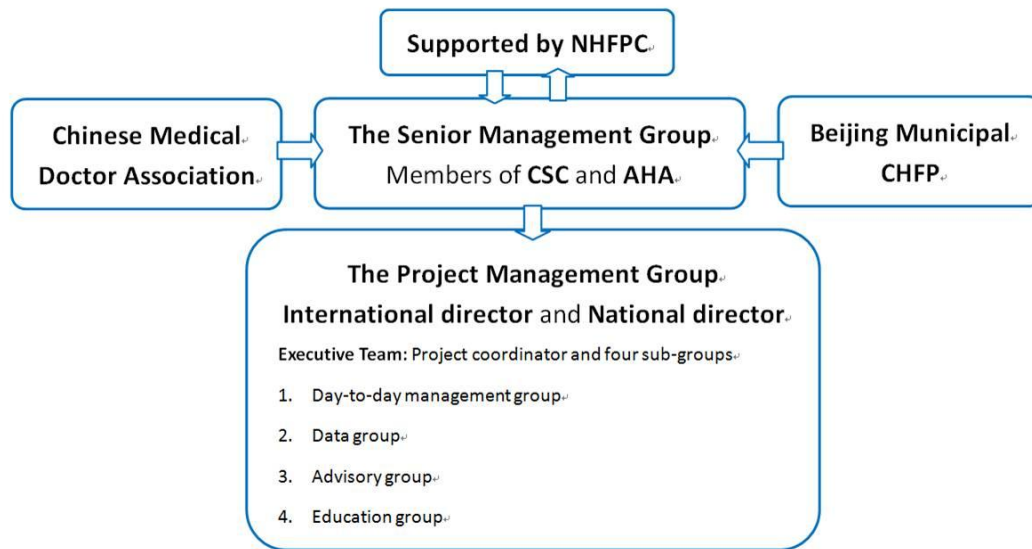

NHFPC, National Health and Family Planning Commission of the People's Republic of China;

CHFP, Commission of Health and Family Planning; CSC, Chinese Society of Cardiology; AHA,

American Heart Association
